# Supplementary material for: A one-pot synthesis of 3-trifluoromethyl-2-isoxazolines from trifluoromethyl aldoxime
Source: PubMed Central journal article supplement (PMC3869255; doi:10.3762/bjoc.9.275), 2013-11-07
Supplement: Beilstein_J_Org_Chem-09-2387-s001.pdf [file Beilstein_J_Org_Chem-09-2387-s001.pdf]

## Supporting Information

for

### **A one-pot synthesis of 3-trifluoromethyl-2-isoxazolines from trifluoromethyl aldoxime**

Raoni S. B. Gonçalves, Michael Dos Santos, Guillaume Bernadat, Danièle Bonnet-Delpon and Benoit Crousse\*

Address: BioCIS CNRS, Faculté de Pharmacie, Labex-LERMIT, Univ Paris Sud, 5 rue J.B. Clément, 92290 Châtenay-Malabry, France

Email: Benoit Crousse\* - Benoit.crousse@u-psud.fr

\* Corresponding author

**General methods, synthetic procedure, spectroscopic data, <sup>1</sup>H NMR, <sup>13</sup>C NMR and <sup>19</sup>F NMR of compounds of 2, 1a–j, 1l–n, 7a, 7b, 6 and computational results**

#### **Content**

1. Characteristics for compounds **2, 1a-1j, 1l-1n, 7a, 7b, 6**
2. <sup>1</sup>H, <sup>13</sup>C and <sup>19</sup>F NMR spectra of **2, 1a-1j, 1l-1n, 7a, 7b** and <sup>19</sup>F NMR of **6**
3. Computational results

## General information

Commercial reagents were purchased from suppliers and used as received. CH<sub>2</sub>Cl<sub>2</sub> was distilled under nitrogen from CaH<sub>2</sub> prior to use. Flash chromatography was performed on commercial 40–63 μm silica gel. Thin layer chromatography was performed on precoated aluminium sheets (0.2 mm). The compounds were visualized under a 254 nm UV light. <sup>1</sup>H NMR spectra, <sup>19</sup>F NMR spectra and <sup>13</sup>C NMR spectra were recorded on apparatus at respectively 200 MHz <sup>1</sup>H, 235.6 MHz <sup>19</sup>F, 75 MHz <sup>13</sup>C or 400 MHz <sup>1</sup>H, 376.2 MHz <sup>19</sup>F, 100.5 MHz <sup>13</sup>C. Chemical shift values (δ) are reported in ppm downfield from Me<sub>4</sub>Si (δ 0.0 ppm), CFC<sub>3</sub> or CDCl<sub>3</sub> as internal standard (δ 77.0 ppm). Data are reported as follows: chemical shift (δ ppm), multiplicity (s = singlet, d = doublet, t = triplet, q = quartet, m = multiplet), integration, coupling constant (Hz). NMR peak assignments have been made on the basis of HMQC, HMBC, and 1H,1H COSY spectra. Infrared (FT-IR) spectra were performed with neat films.

### 1. Characteristics for compounds **2**, **1a–j**, **1l–n**, **7a**, **7b**, **6**

#### General Procedure for the Synthesis **2,2,2-trifluoroacetaldehyde oxime 2** :

2,2,2-trifluoroethane-1,1-diol (22.5 g, 0.194 mol, 1 eq.) was add to an aqueous solution of hydroxylamine (30%) (7.68 g, 0.232 mol, 1.2 eq.). The reaction stirred for 24 h under argon atmosphere. The crude product was purified by a fractional distillation. <sup>1</sup>H NMR (300 MHz, CDCl<sub>3</sub>) δ 8.7 (s, 1H), 7.5 (q, *J* = 4.1 Hz, 1H), 2.2 (s, ½ H<sub>2</sub>O). <sup>13</sup>C NMR (75 MHz, CDCl<sub>3</sub>) δ 139.7 (q, *J* = 37.5 Hz), 119.7 (q, *J* = 270.0 Hz). <sup>19</sup>F NMR (188 MHz, CDCl<sub>3</sub>) δ -65.50 (d, *J* = 4.2 Hz).

#### General Procedure for the Synthesis Isoxazoles **1**:

At a solution of DIB (2.0 mmol) and olefin (1.0 mmol) in dichloromethane (2 mL) the 2,2,2-trifluoroacetaldehyde oxime **2** (1.0 mmol) in dichloromethane (1 mL) was added slowly at 0°C. The media was warmed at room temperature and upon consumption of starting olefin (TLC, and <sup>19</sup>F NMR of the crude). The mixture was concentrated in vacuo and the residue was purified by flash column chromatography (5% ethyl acetate/cyclohexane).

**Synthesis of 5-benzyl-3-(trifluoromethyl)-4,5-dihydroisoxazole 1a**: colorless oil, 174 mg, 76%; <sup>1</sup>H NMR (300 MHz, CDCl<sub>3</sub>) δ 7.54-7.12 (m, 5H), 5.13 (ddd, *J* = 14.4, 10.8, 6.6 Hz, 1H), 3.28-3.07 (m, 2H), 2.91 (ddd, *J* = 11.2, 9.2, 4.0 Hz, 2H). <sup>13</sup>C NMR (75 MHz, CDCl<sub>3</sub>) δ 148.64 (q, *J* = 37.3 Hz), 135.4, 129.3, 128.7, 127.1, 119.6 (q, *J* = 271.2 Hz), 84.0, 40.5, 36.3. <sup>19</sup>F (188 MHz, CDCl<sub>3</sub>) δ -67.01 (s). IR (ν,cm<sup>-1</sup>): 1625. Anal. Calcd for C<sub>11</sub>H<sub>10</sub>F<sub>3</sub>NO: C, 57.64; H, 4.40; N, 6.11. Found : C, 57.65; H, 4.51; N, 5.99.

**Synthesis of benzyl (3-(trifluoromethyl)-4,5-dihydroisoxazol-5-yl)methylcarbamate 1b**: oil, 272 mg, 90%; <sup>1</sup>H NMR (300 MHz, CDCl<sub>3</sub>) δ 7.39-7.29 (m, 5H), 5.11 (s, 2H), 5.01-4.92 (m, 1H), 3.49-3.41 (m, 2H) 3.22 (dd, *J* = 11.4, 17.4 Hz, 1H), 2.99 (dd, *J* = 7.8, 17.7 Hz, 1H). <sup>13</sup>C NMR (75 MHz, CDCl<sub>3</sub>) δ 156.8, 149.2 (q, *J* = 38.0 Hz), 136.1, 128.5, 128.3, 128.0, 119.7 (q, *J* = 282.0 Hz), 82.3, 67.2, 43.6, 34.5. <sup>19</sup>F (188

MHz, CDCl<sub>3</sub>)  $\delta$  -66.92 (s). Anal. Calcd for C<sub>13</sub>H<sub>13</sub>F<sub>3</sub>N<sub>2</sub>O<sub>3</sub>: C, 51.66; H, 4.43 ; N, 9.27 . Found : C, 52.01 ; H, 4.56 ; N, 9.34.

**Synthesis of tert-butyl (3-(trifluoromethyl)-4,5-dihydroisoxazol-5-yl)methylcarbamate 1c:** white solid, 243 mg, 91%, mp 67-70°C; <sup>1</sup>H NMR (300 MHz, CDCl<sub>3</sub>)  $\delta$  4.98 (ddd, *J* = 11.5, 8.0, 4.1 Hz, 1H), 4.87 (s, 1H), 3.44 (m, 2H), 3.24 (dd, *J* = 17.6, 11.1 Hz, 1H), 3.05 (dd, *J* = 17.6, 7.8 Hz, 1H), 1.46 (s, 9H). <sup>13</sup>C NMR (75 MHz, CDCl<sub>3</sub>)  $\delta$  156.3, 149.2 (q, *J* = 36.8 Hz), 119.5 (q, *J* = 271.2 Hz), 82.5, 79.9, 43.1, 34.3, 28.1. <sup>19</sup>F (188 MHz, CDCl<sub>3</sub>)  $\delta$  -67.02 (s). IR (v,cm<sup>-1</sup>): 1725; 1643. Anal. Calcd for C<sub>10</sub>H<sub>15</sub>F<sub>3</sub>N<sub>2</sub>O<sub>3</sub>: C, 44.78 ; H, 5.64 ; N, 10.44 . Found : C, 44.70 ; H, 5.62 ; N, 10.57.

**Synthesis of ethyl 9-(3-(trifluoromethyl)-4,5-dihydroisoxazol-5-yl)nonanoate 1d:** white solid, 206 mg, 64%, mp 30-32°C; <sup>1</sup>H NMR (300 MHz, CDCl<sub>3</sub>)  $\delta$  4.82 (m, 1H), 4.11 (q, *J* = 7.1 Hz, 2H), 3.20 (dd, *J* = 17.1, 10.8 Hz, 1H), 2.77 (dd, *J* = 17.1, 8.5 Hz, 1H), 2.28 (t, *J* = 7.5 Hz, 2H), 1.79-1.56 (m, 4H), 1.30 (s, 10H), 1.24 (t, *J* = 7.1 Hz, 3H). <sup>13</sup>C NMR (75 MHz, CDCl<sub>3</sub>)  $\delta$  173.8, 148.5 (q, *J* = 37.1 Hz), 119.8 (q, *J* = 270.8 Hz), 83.9, 60.1, 36.9, 34.8, 34.3, 29.2, 29.1, 29.05, 29.0, 25.0, 24.9, 14.2. <sup>19</sup>F (188 MHz, CDCl<sub>3</sub>)  $\delta$  -67.18 (s). IR (v,cm<sup>-1</sup>): 2914, 1725, 1661. Anal. Calcd for C<sub>15</sub>H<sub>24</sub>F<sub>3</sub>NO<sub>3</sub>: C, 55.72; H, 7.48; N, 4.33. Found : C, 55.69; H, 7.53; N, 4.41.

**Synthesis of 9-(3-(trifluoromethyl)-4,5-dihydroisoxazol-5-yl)-nonanoic acid 1e:** white solid, 150 mg, 51%, mp 57-60°C; <sup>1</sup>H NMR (200 MHz, CDCl<sub>3</sub>)  $\delta$  9.8 (large s, 1H), 4.8 (m, 1H), 3.2 (dd, *J* = 6.4, 1.3 Hz, 1H), 2.78 (dd, *J* = 16.5, 7.8 Hz, 1H), 2.3 (t, *J* = 7.4 Hz, 2H), 1.82-1.5 (m, 4H), 1.47-1.16 (m, 10H). <sup>13</sup>C NMR (75 MHz, CDCl<sub>3</sub>)  $\delta$  180.0, 148.8 (q, *J* = 37.3 Hz), 119.8 (q, *J* = 274.8 Hz), 83.9, 36.9, 34.8, 33.9, 29.1, 29.0, 28.9, 25.0, 24.6. <sup>19</sup>F (188 MHz, CDCl<sub>3</sub>)  $\delta$  -66.97 (s). IR (v,cm<sup>-1</sup>): 2851, 1711, 1623. Anal. Calcd for C<sub>13</sub>H<sub>20</sub>F<sub>3</sub>NO<sub>3</sub>: C, 52.88 ; H, 6.83 ; N, 4.74 . Found : C, 52.75 ; H, 6.94 ; N, 4.85.

**Synthesis of 5-(4-bromophenyl)-3-(trifluoromethyl)-4,5-dihydroisoxazole 1f:** colorless oil, 164 mg, 56%; <sup>1</sup>H NMR (300 MHz, CDCl<sub>3</sub>)  $\delta$  7.56 (d, *J* = 8.3 Hz, 2H), 7.22 (d, *J* = 8.3 Hz, 2H), 5.8 (dd, *J* = 11.4, 8.8 Hz, 1H), 3.63 (ddq, *J* = 17.5, 11.5, 1.3 Hz, 1H), 3.14 (ddq, *J* = 17.5, 8.8, 1.3 Hz, 1H). <sup>13</sup>C NMR (75 MHz, CDCl<sub>3</sub>)  $\delta$  148.4 (q, *J* = 37.4 Hz), 137.8, 132.2, 127.4, 123.0, 119.5 (q, *J* = 271.3 Hz), 84.0, 39.9. <sup>19</sup>F (188 MHz, CDCl<sub>3</sub>)  $\delta$  -66.69 (s). IR (v,cm<sup>-1</sup>): 1629. Anal. Calcd for C<sub>10</sub>H<sub>7</sub>F<sub>3</sub>NOBr: C, 40.84 ; H, 2.40 ; N, 4.76 . Found : C, 40.86 ; H, 2.49 ; N, 4.82.

**Synthesis of 3-(trifluoromethyl)-5-((trimethylsilyl)methyl)-4,5-dihydroisoxazole 1g:** yellowish oil, 184 mg, 82%; <sup>1</sup>H NMR (300 MHz, CDCl<sub>3</sub>)  $\delta$  4.87 (m, 1H), 3.2 (ddq, *J* = 17.0, 10.3, 1.3 Hz, 1H), 2.7 (ddq, *J* = 17.0, 9.5, 1.3 Hz, 1H), 1.28 (dd, *J* = 14.2, 6.3 Hz, 1H), 1.05 (dd, *J* = 14.2, 8.5 Hz, 1H), 0.09 (s, 9H). <sup>13</sup>C NMR (75 MHz, CDCl<sub>3</sub>)  $\delta$  149.7 (q, *J* = 37.2 Hz), 121.0 (q, *J* = 275.1 Hz), 83.1, 39.3, 24.3, 0.2. <sup>19</sup>F (188 MHz, CDCl<sub>3</sub>)  $\delta$  -67.06 (s). IR (cm<sup>-1</sup>): 1664. Anal. Calcd for C<sub>8</sub>H<sub>14</sub>F<sub>3</sub>NOSi: C, 42.65 ; H, 6.26 ; N, 6.22 . Found : C, 42.71 ; H, 6.18 ; N, 6.25.

**Synthesis of 3-(trifluoromethyl)-3a, 4, 5, 6, 7, 8, 9,9a-octahydrocycloocta[d]isoxazole 1h:** colorless oil, 163 mg, 74%; <sup>1</sup>H NMR (300 MHz, CDCl<sub>3</sub>)  $\delta$  4.7 (m, 1H), 3.2 (m, 1H), 2.1-1.9 (m, 2H), 1.7-1.1 (m, 10H). <sup>13</sup>C NMR (75 MHz, CDCl<sub>3</sub>)  $\delta$  153.2 (q, *J* = 34.3 Hz), 122.2 (q, *J* = 272.3 Hz), 88.0, 48.4, 29.4,

25.7, 25.5, 25.2, 25.0, 23.3.  $^{19}\text{F}$  (188 MHz,  $\text{CDCl}_3$ )  $\delta$  -63.71 (s). IR ( $\nu, \text{cm}^{-1}$ ): 2936, 1629. Anal. Calcd for  $\text{C}_{10}\text{H}_{14}\text{F}_3\text{NO}$ : C, 54.29 ; H, 6.38 ; N, 6.33 . Found : C, 54.33 ; H, 6.45 ; N, 6.42.

**Synthesis of methyl-3-(trifluoromethyl)-4,5-dihydroisoxazole-5-carboxylate 1i:** colourless oil, 47 mg, 24%;  $^1\text{H}$  NMR (300 MHz,  $\text{CDCl}_3$ )  $\delta$  5.3 (dd,  $J = 11.4, 7.9$  Hz, 1H), 3.85 (s, 3H), 3.5 (m, 2H).  $^{13}\text{C}$  NMR (75 MHz,  $\text{CDCl}_3$ )  $\delta$  168.7, 148.6 (q,  $J = 37.5$  Hz), 119.2 (q,  $J = 270.2$  Hz), 79.6, 53.2, 35.9.  $^{19}\text{F}$  (188 MHz,  $\text{CDCl}_3$ )  $\delta$  -66.51 (s). IR ( $\nu, \text{cm}^{-1}$ ): 1730, 1664. Anal. Calcd for  $\text{C}_6\text{H}_6\text{F}_3\text{NO}_3$ : C, 36.56 ; H, 3.07 ; N, 7.11 . Found : C, 36.52 ; H, 3.12 ; N, 7.20.

**Synthesis of 5-(bromomethyl)-3-(trifluoromethyl)-4,5-dihydroisoxazole 1j:** Yellowish oil, 46 mg, 20%;  $^1\text{H}$  NMR (200 MHz,  $\text{CDCl}_3$ )  $\delta$  5.1 (m, 1H), 3.56 (dd,  $J = 10.8, 4.1$  Hz, 1H), 3.45 (dd,  $J = 10.8, 7.2$  Hz, 1H), 3.31 (ddq,  $J = 17.7, 10.8, 1.4$  Hz, 1H), 3.20 (ddq,  $J = 17.7, 7.2, 1.4$  Hz, 1H).  $^{13}\text{C}$  NMR (75 MHz,  $\text{CDCl}_3$ )  $\delta$  148.4 q,  $J = 37.3$  Hz), 119.3 (q,  $J = 269.7$  Hz), 81.5, 36.5, 32.0.  $^{19}\text{F}$  (188 MHz,  $\text{CDCl}_3$ )  $\delta$  -66.82 (s). IR ( $\nu, \text{cm}^{-1}$ ): 1660. Anal. Calcd for  $\text{C}_5\text{H}_5\text{F}_3\text{NOBr}$ : C, 25.89 ; H, 2.17 ; N, 6.04 . Found : C, 25.95 ; H, 2.22 ; N, 6.21.

**Synthesis of 5-phenyl-3-(trifluoromethyl)isoxazole 1l [1]:** Yellow solid, 113mg, 53%, mp 40-43°C;  $^1\text{H}$  NMR (300 MHz,  $\text{CDCl}_3$ )  $\delta$  7.82 (m, 2H), 7.5 (m, 3H), 6.74 (s, 1H).  $^{13}\text{C}$  NMR (75 MHz,  $\text{CDCl}_3$ )  $\delta$  172.4, 156.0 (q,  $J = 38.5$  Hz), 131.2, 129.2, 128.6, 126.0, 119.7 (q,  $J = 271.7$  Hz), 96.7.  $^{19}\text{F}$  (188 MHz,  $\text{CDCl}_3$ )  $\delta$  -63.65 (s). IR ( $\nu, \text{cm}^{-1}$ ): 1661. Anal. Calcd for  $\text{C}_{10}\text{H}_6\text{F}_3\text{NO}$ : C, 56.35 ; H, 2.84 ; N, 6.57 . Found : C, 56.44 ; H, 2.91 ; N, 6.60.

**Synthesis of 3-(trifluoromethyl)-5-(trimethylsilyl)isoxazole 1m :** colorless oil, 90mg, 50%;  $^1\text{H}$  NMR (300 MHz,  $\text{CDCl}_3$ )  $\delta$  6.65 (s, 1H), 0.4 (s, 9H).  $^{13}\text{C}$  NMR (75 MHz,  $\text{CDCl}_3$ )  $\delta$  181.7, 154.0 (q,  $J = 37.8$  Hz), 120.3 (q,  $J = 270.8$  Hz), 109.6, -2.2. IR ( $\nu, \text{cm}^{-1}$ ): 1668.  $^{19}\text{F}$  (188 MHz,  $\text{CDCl}_3$ )  $\delta$  -62.66 (s). Anal. Calcd for  $\text{C}_7\text{H}_{10}\text{F}_3\text{NO}$ : C, 40.18 ; H, 4.82 ; N, 6.69 . Found : C, 40.22 ; H, 4.91 ; N, 6.73.

#### General Procedure for the synthesis of amino alcohols:

**Synthesis of 4-amino-5,5,5-trifluoro-1-phenylpentan-2-ol 7a:**  $\text{NiCl}_2 \cdot 6\text{H}_2\text{O}$  (0.620 g, 2.62 mmol, 3 eq.) and 5-benzyl-3-(trifluoromethyl)-4,5-dihydroisoxazole (300 mg, 1.31 mmol, 1 eq.) were dissolved in 3:1 mixture of MeOH/ THF at -42°C. After 10 min of stirring,  $\text{NaBH}_4$  (0.495g, 2.618 mmol, 10 eq.) was upon with the reaction, the mixture immediately turned black. After 3 days The mixture was concentrated in vacuo and the residue was purified by flash column chromatography (DCM/MeOH); white solid, 154 mg, 50%, mp 88-90°C;  $^1\text{H}$  NMR (400 MHz,  $\text{CDCl}_3$ )  $\delta$  *Syn*: 7.34-7.21 (m, 5H), 4.1 (m, 1H), 3.36 (m, 1H), 2.87 (dd,  $J = 4.0, 12.0$  Hz, 1H), 2.74 (dd,  $J = 8.0, 12.0$  Hz, 1H), 1.88 (m, 1H), 1.46 (m, 1H). *Anti*: 7.3-7.2 (m, 5H), 4.184.15 (m, 1H), 3.55 (m, 1H), 2.81 (d,  $J = 8.0$  Hz, 2H), 1.80 (1H, m), 1.62 (1H, m),  $^{13}\text{C}$  NMR (100 MHz,  $\text{CDCl}_3$ )  $\delta$  129.6, (129.5), 128.8 (128.6), 126.8 (126.6), 72.9, 68.8, 54.5 (q,  $J = 30.0$  Hz) (50.6 (q,  $J = 29.4$  Hz), 44.3 (44.1), 35.1 (34.2),  $\text{CF}_3$  n.o. .  $^{19}\text{F}$  (188 MHz,  $\text{CDCl}_3$ )  $\delta$  -77.2 (d,  $J = 7.4$  Hz), -77.9 (d,  $J = 7.1$  Hz). Anal. Calcd for  $\text{C}_{11}\text{H}_{14}\text{F}_3\text{NO}$ : C, 56.65 ; H, 6.05 ; N, 6.01 . Found : C, 56.71 ; H, 6.12 ; N, 5.95.

**Synthesis of benzyl 4-amino-5,5,5-trifluoro-2-hydroxypentylcarbamate 7b:** 207 mg, 52%,;  $^1\text{H}$  NMR (400 MHz, MeOD)  $\delta$  7.35-7.29 (m, 12H), 5.08 (s, 4.5H), 3.92-3.86 (m, 1.6H), 3.45-3.42 (m, 1.6H), 3.23-

3.05 (m, 4.4H), 1.85 (dt,  $J = 4.0, 8.0$  Hz, 1H), 1.69-1.63 (m, 1H), 1.56-1.44 (m, 2.7H),  $^{13}\text{C}$  NMR (100 MHz, MeOD)  $\delta$  159.1, 138.4, 129.4, 129.0, 128.8, 128.4 (q,  $J = 280.7$  Hz), 127.8 (q,  $J = 280.7$  Hz), 70.6, 67.5, 67.4, 53.5 (q,  $J = 29.2$  Hz), 51.4 (q,  $J = 29.1$  Hz), 48.1, 47.7, 35.4, 34.6.  $^{19}\text{F}$  (188 MHz,  $\text{CDCl}_3$ )  $\delta$  -80.52 (d,  $J = 7.5$  Hz) 59%, -80.36 (d,  $J = 7.9$  Hz) 41%. Anal. Calcd for  $\text{C}_{13}\text{H}_{17}\text{F}_3\text{N}_2\text{O}_3$ : C, 50.98 ; H, 5.59 ; N, 9.15 . Found : C, 51.05 ; H, 5.63 ; N, 9.22.

2.  $^1\text{H}$ ,  $^{13}\text{C}$  and  $^{19}\text{F}$  NMR spectra of **2**, **1a–1j**, **1l–1n**, **7a**, **7b** and  $^{19}\text{F}$  NMR of **6**

2,2,2-trifluoroacetaldehyde oxime (**2**)

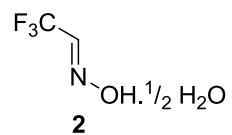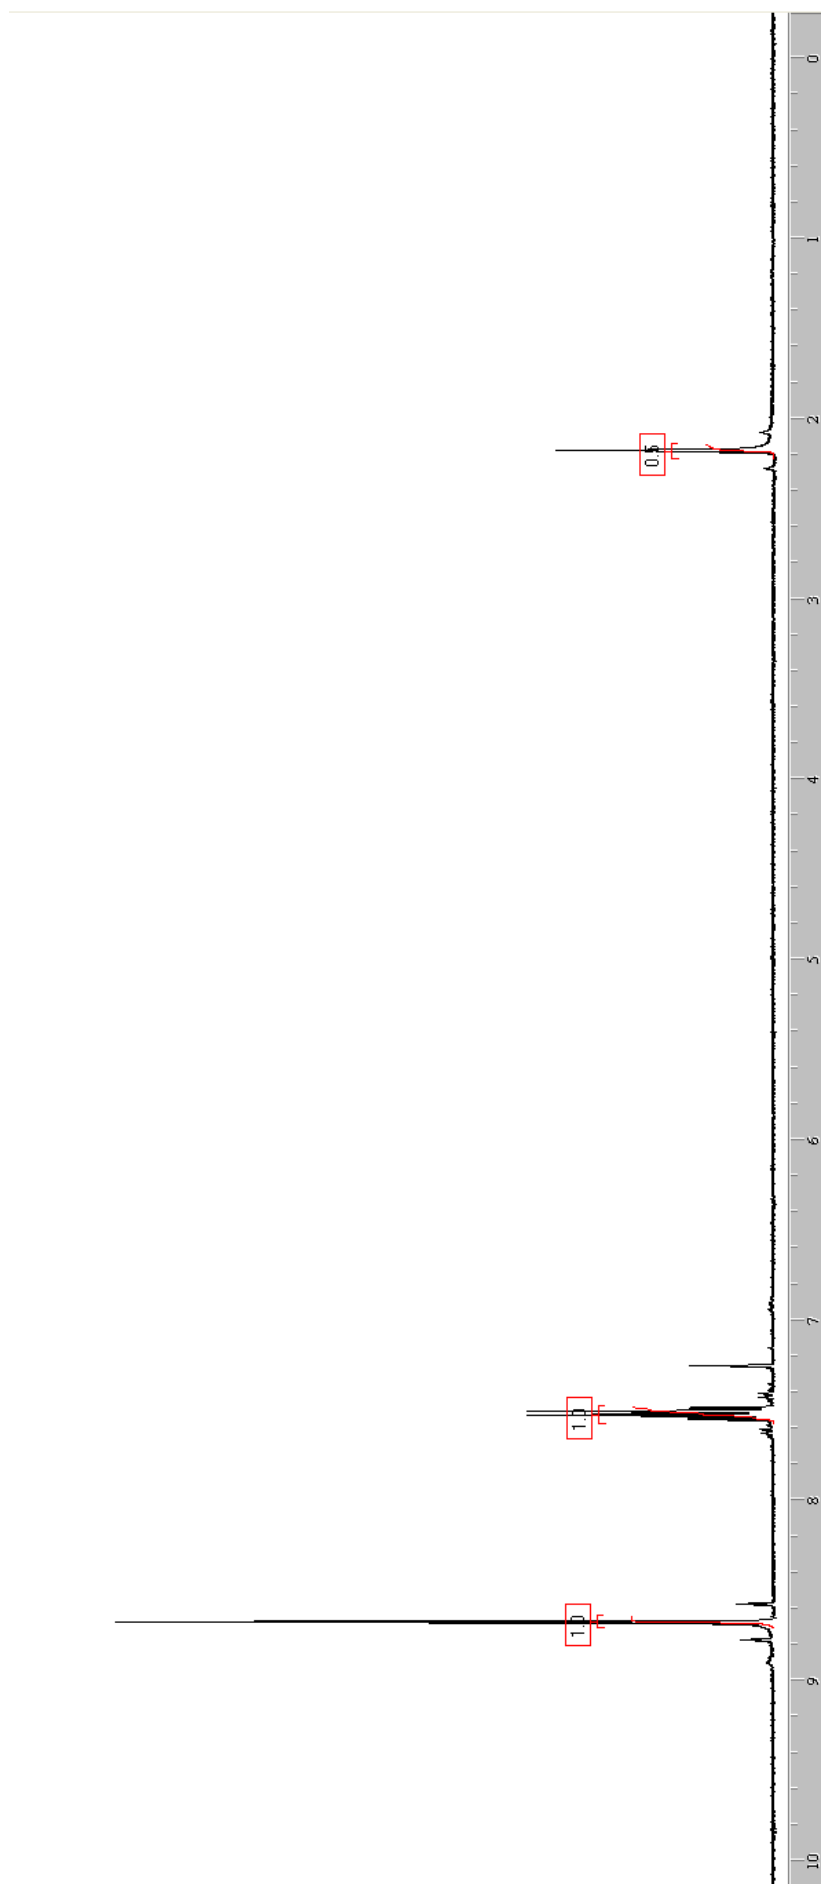

75

ALDOXIME  
CARBONE CDCI3 D:\ fluor 47

140.22  
139.72  
139.22  
138.72  
137.38  
124.88  
121.30  
117.72  
114.14  
77.19  
76.77  
76.34

NAME 2013-03-29  
 EXENO 51  
 PROCNO 1  
 Date\_ 20130321  
 Time\_ 17:56  
 INSTRUM spect  
 FROBHD 5 mm DUL 13C-1  
 T1AFROC 25230  
 TD 65230  
 SOLVENT CDCl3  
 NS 128  
 GRH 17985.611 Hz  
 FIDRES 0.274439 Hz  
 AQ 1.8219508 sec  
 RM 21.806 usec  
 DE 6.50 usec  
 TE 300.0 K  
 D1 0.000000 sec  
 D11 0.03000000 sec  
 TD0 1  
 ===== CHANNEL f1 =====  
 NUC1 13C  
 P1 6.00 usec  
 PL1 0.00 dB  
 SF01 75.47760505 MHz  
 ===== CHANNEL f2 =====  
 CPDPRG2 waltz16  
 NUCC 100.1H  
 P12 100.00 usec  
 PL2 0.00 dB  
 PL12 23.41 dB  
 PL13 20.50 dB  
 SF02 300.13705000 MHz  
 SI 32768  
 SF 75.4677490 MHz  
 EM  
 ZS 3.00 Hz  
 GB 0  
 EC 1.40

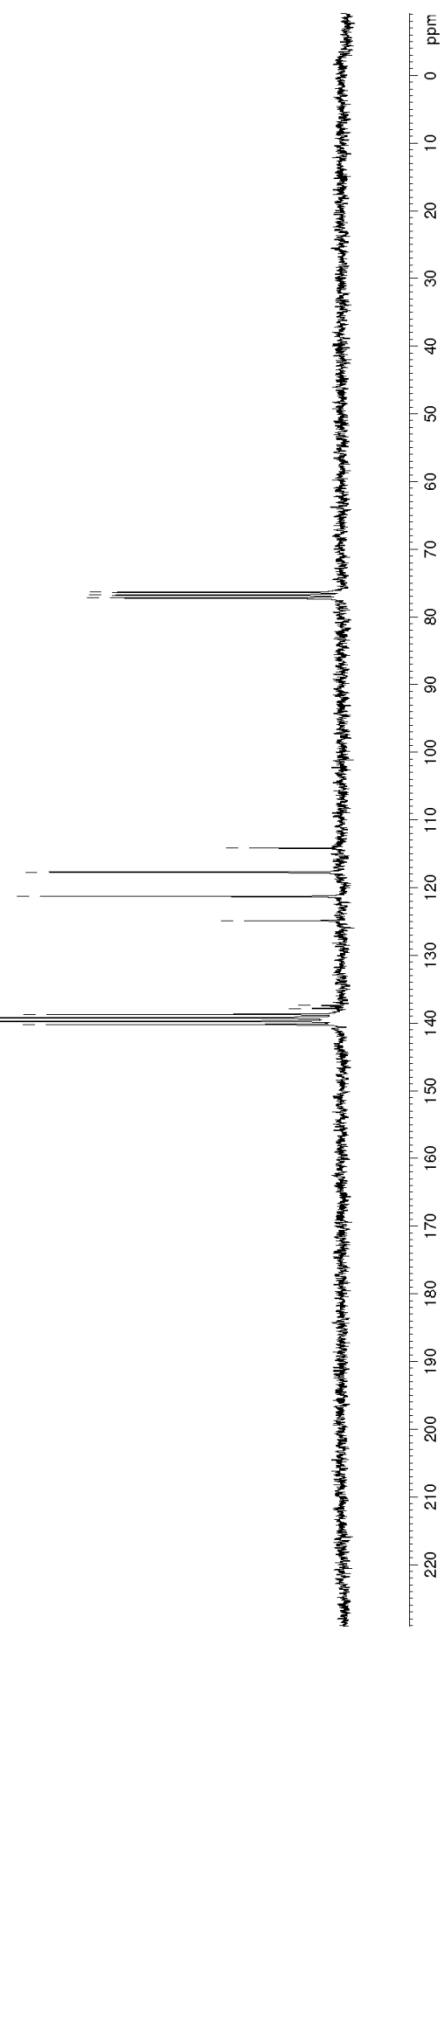

NAME 2013-03-29  
 EXPNO 51  
 PROCNO 1  
 Date\_ 20130329  
 Time 17.56  
 INSTRUM spect  
 PROBDW 5 mm BBL 13C-1  
 PULPROG zgpg30  
 TD 65536  
 SOLVENT CDCl3  
 NS 128  
 DS ..... 4

**ALDOXIME**  
**CARBONE CDC13 D:\ fluor 47**

75

77.19  
76.77  
76.34

140.22  
139.72  
139.22  
138.72  
137.86  
137.38  
124.88  
121.30  
117.72  
114.14

67.386  
67.361

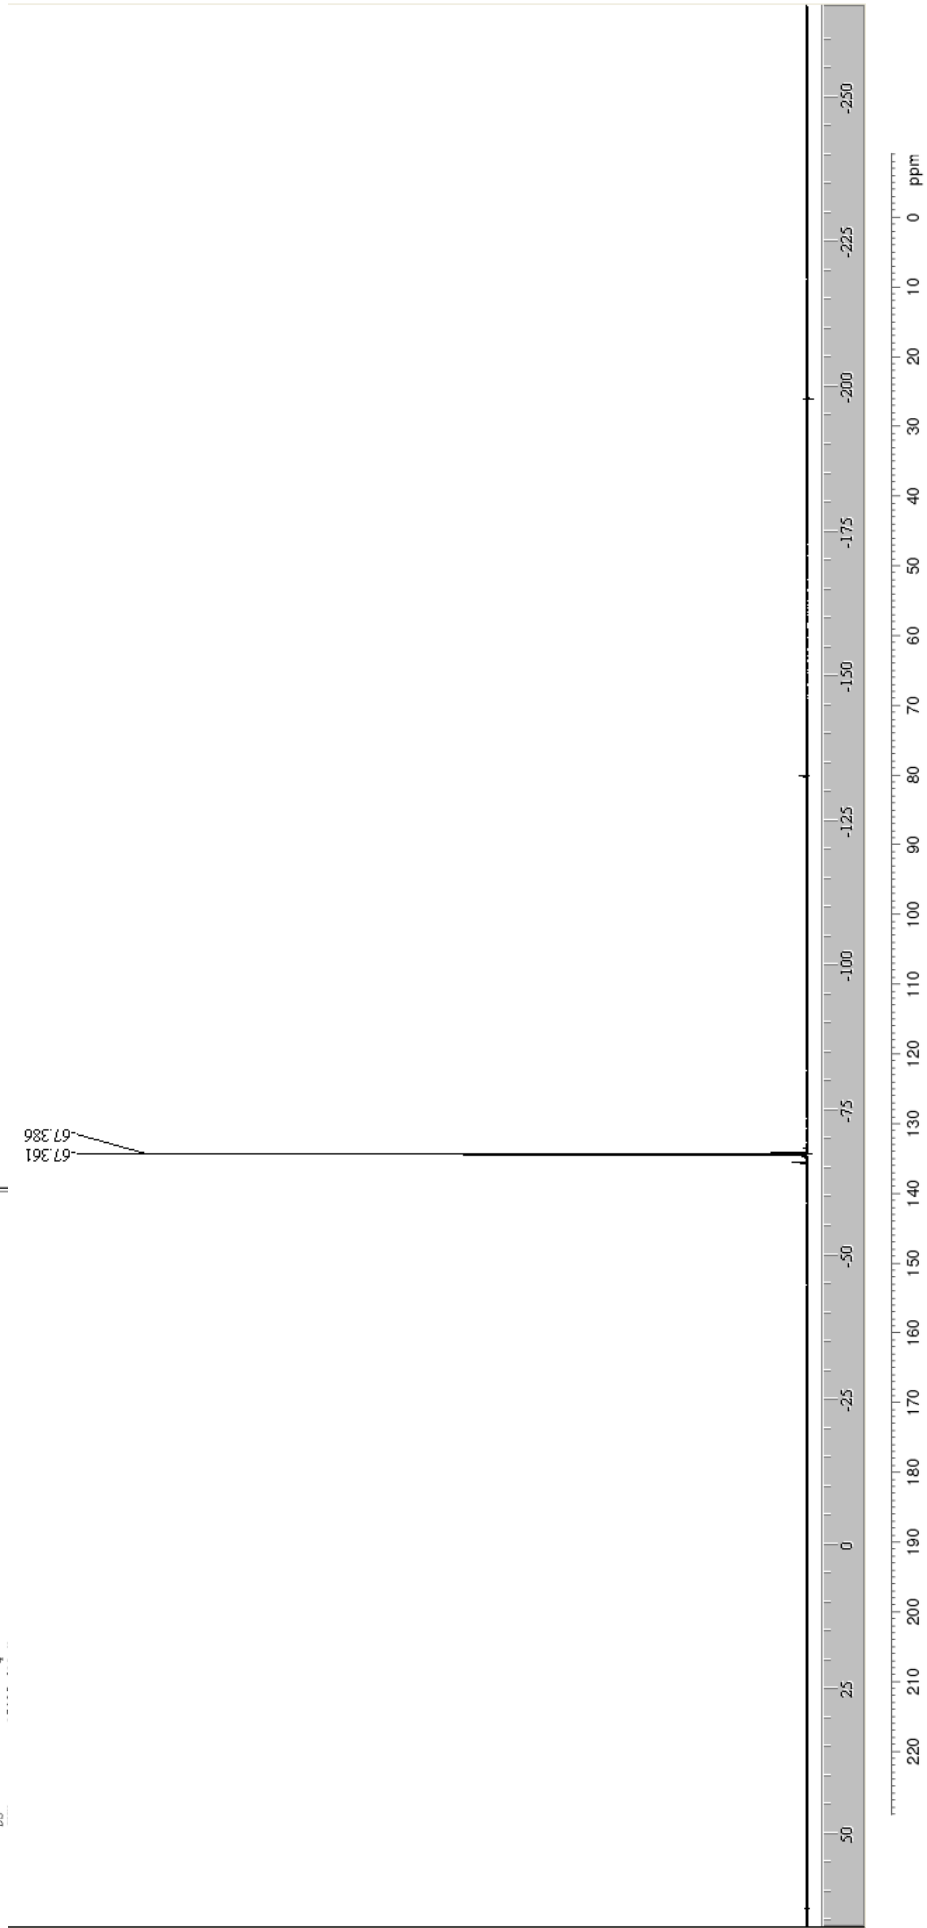



$^{19}\text{F}$ - $^{19}\text{F}$  NOESY

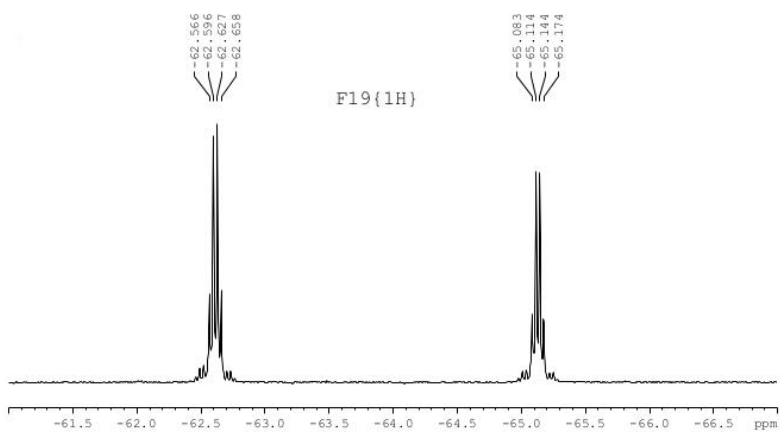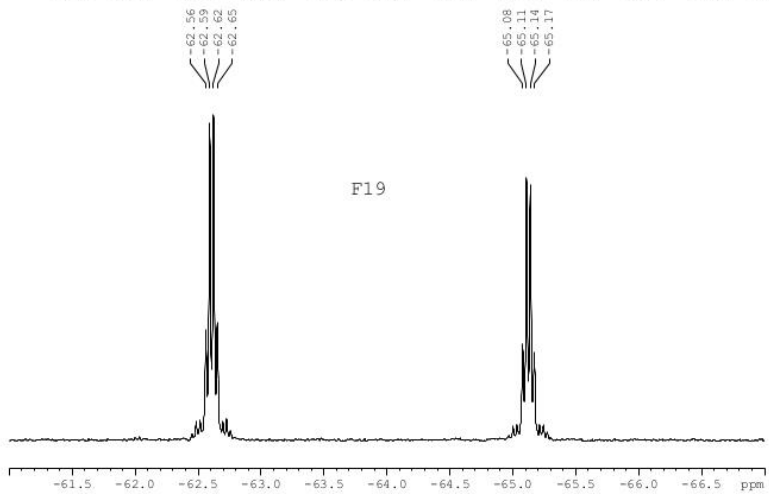

$^{19}\text{F}$ - $^{19}\text{F}$  COSY

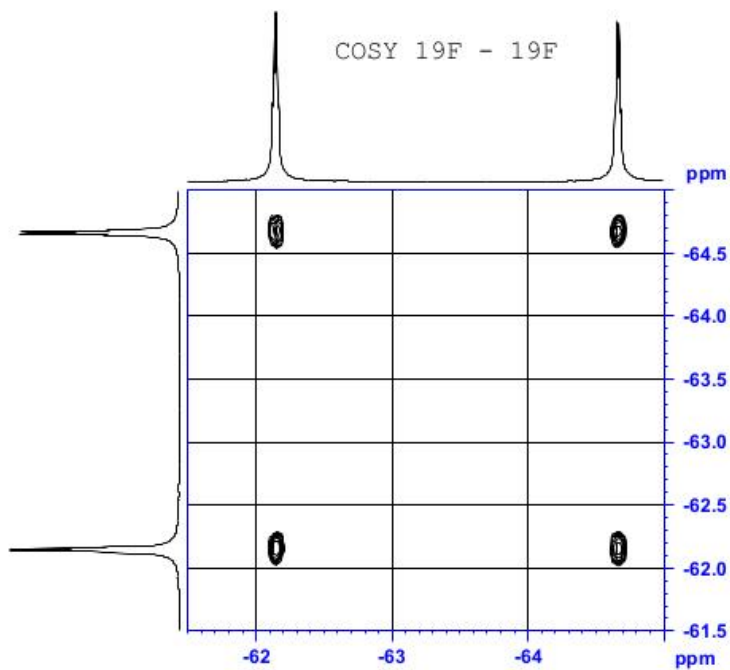

5-Benzyl-3-(trifluoromethyl)-4,5-dihydroisoxazole (**1a**)

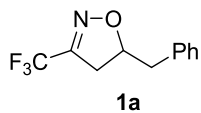

KL\_ALLYBEZEN  
Proton.4 CDCI3 D:\\ fluor 54

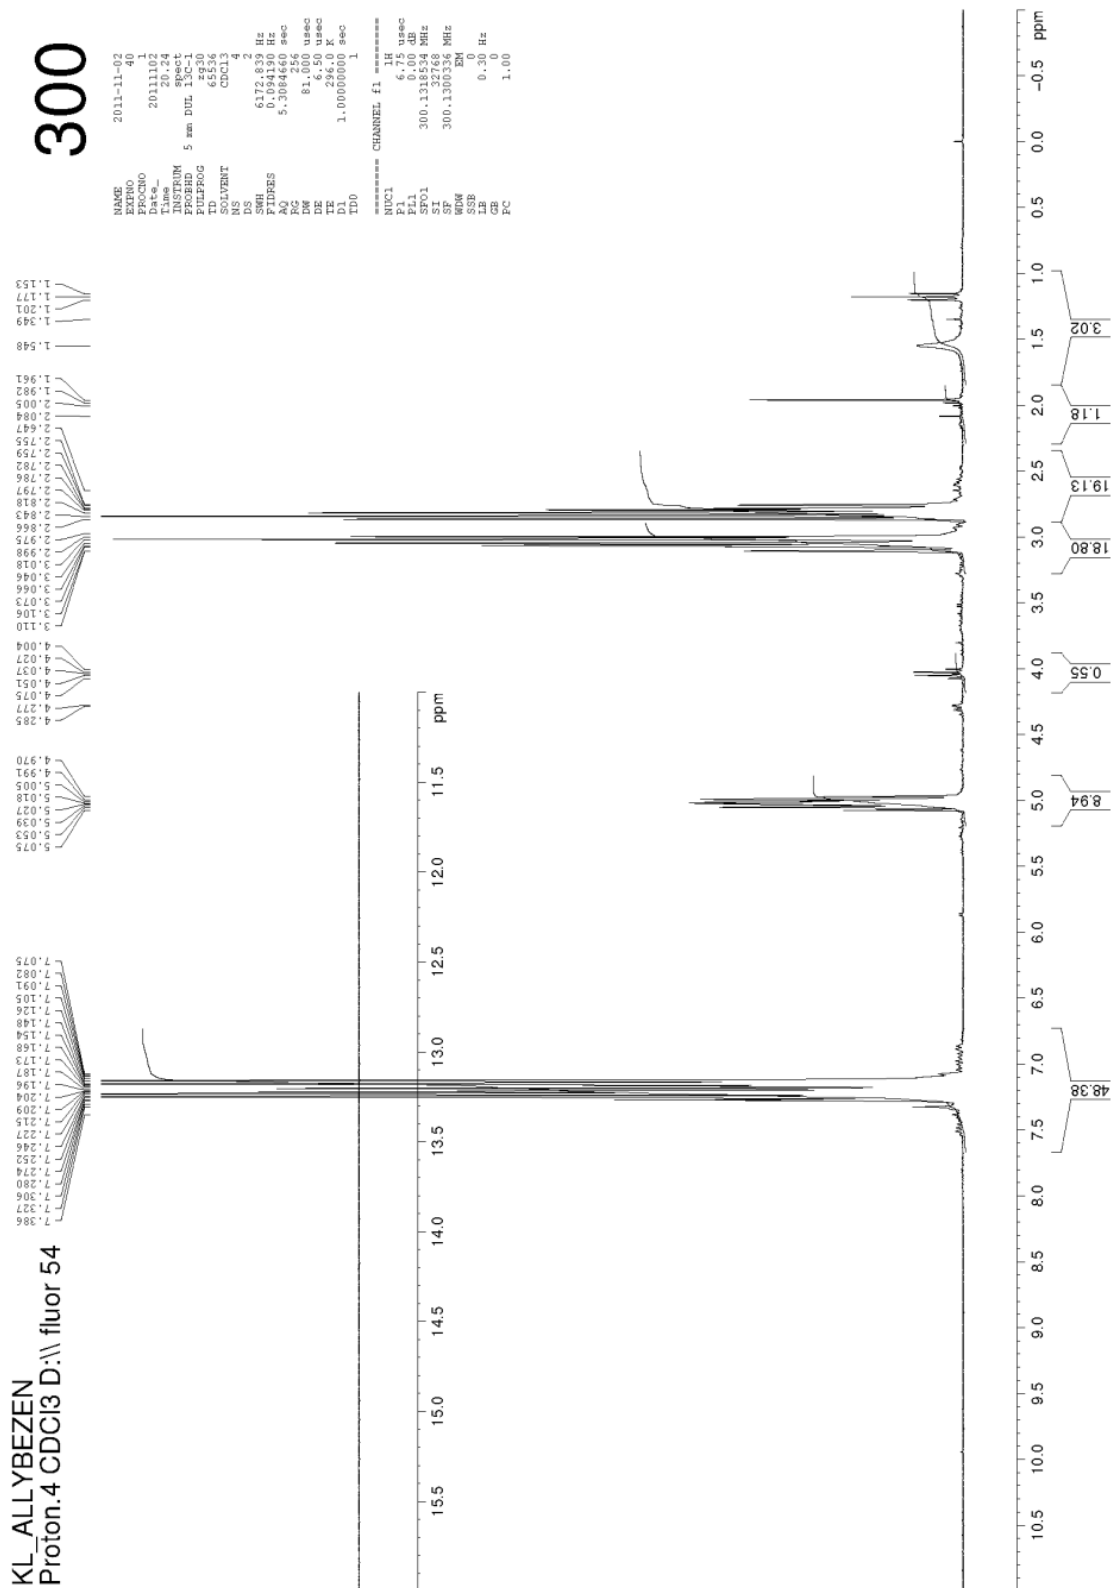

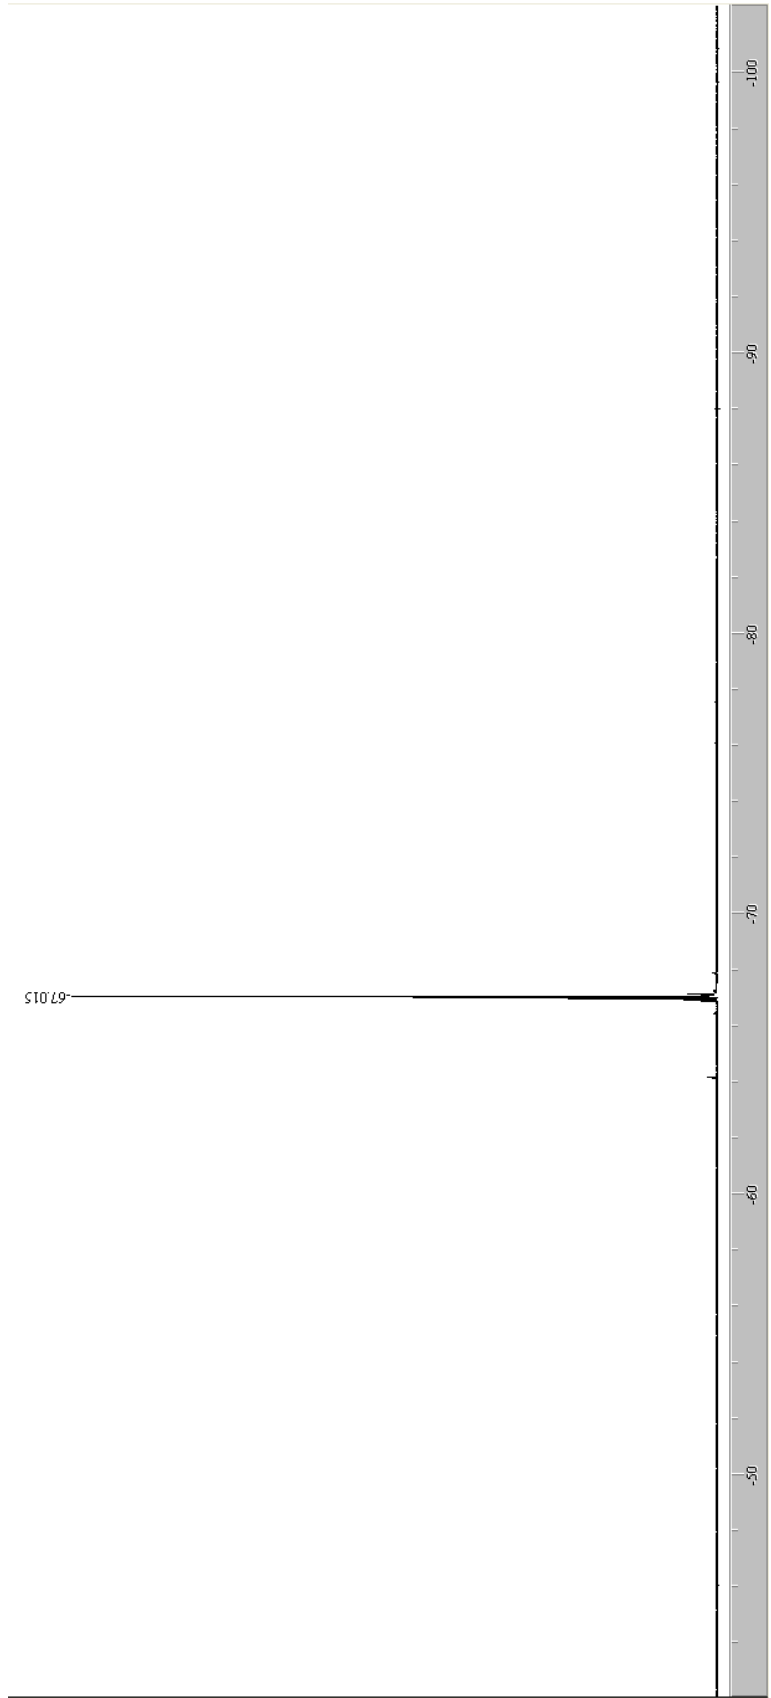

NAME 2011-11-02  
 EXPNO 41  
 Date\_ 20111102  
 Time 20.34  
 PROCNM 1D  
 PULPROG zgpg30  
 ID 65536  
 SOLVENT CDCl3  
 NS 128  
 DS 4  
 SWH 1798.613 Hz  
 FIDRES 0.274433 Hz  
 AQ 1.8219508 sec  
 RG 299.00  
 DC 299.00 usec  
 DE 6.50 usec  
 TE 286.3 K  
 D1 0.0300000 sec  
 TD0 1

**KL ALLYBEZEN**  
**CARBONE CDC13 D:\ fluor 54**

===== CHANNEL f1 =====  
 NUCL1 13C  
 P1 6.00 usec  
 PL1 0.00 dB  
 SFO1 75.4766505 MHz  
 ===== CHANNEL f2 =====  
 CEPRP22 wait13  
 NUCL2 1H  
 FCPD2 100.00 usec  
 PL12 3.00 dB  
 PL13 20.50 dB  
 SFO2 300.1312005 MHz  
 SF 75.4677490 MHz  
 WDW EM  
 SSF 3.00 Hz  
 LB 0  
 GB 0  
 FC 1.40

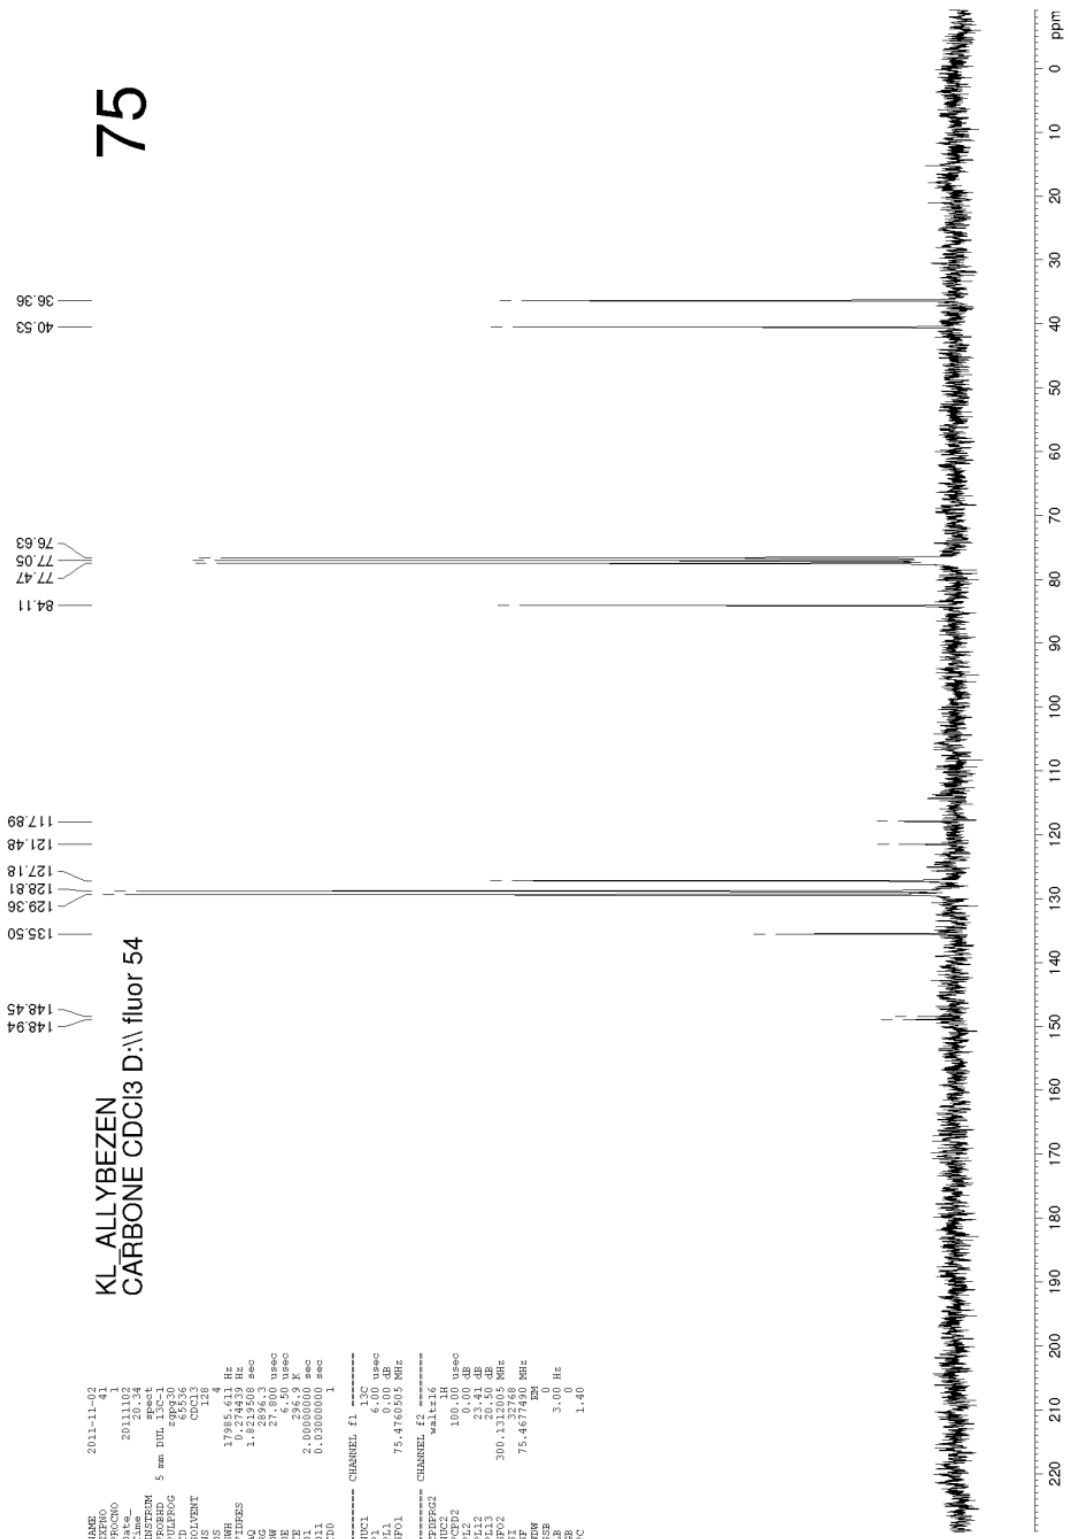

75

Benzyl (3-(trifluoromethyl)-4,5-dihydroisoxazol-5-yl)methylcarbamate (**1b**)

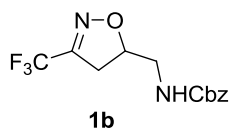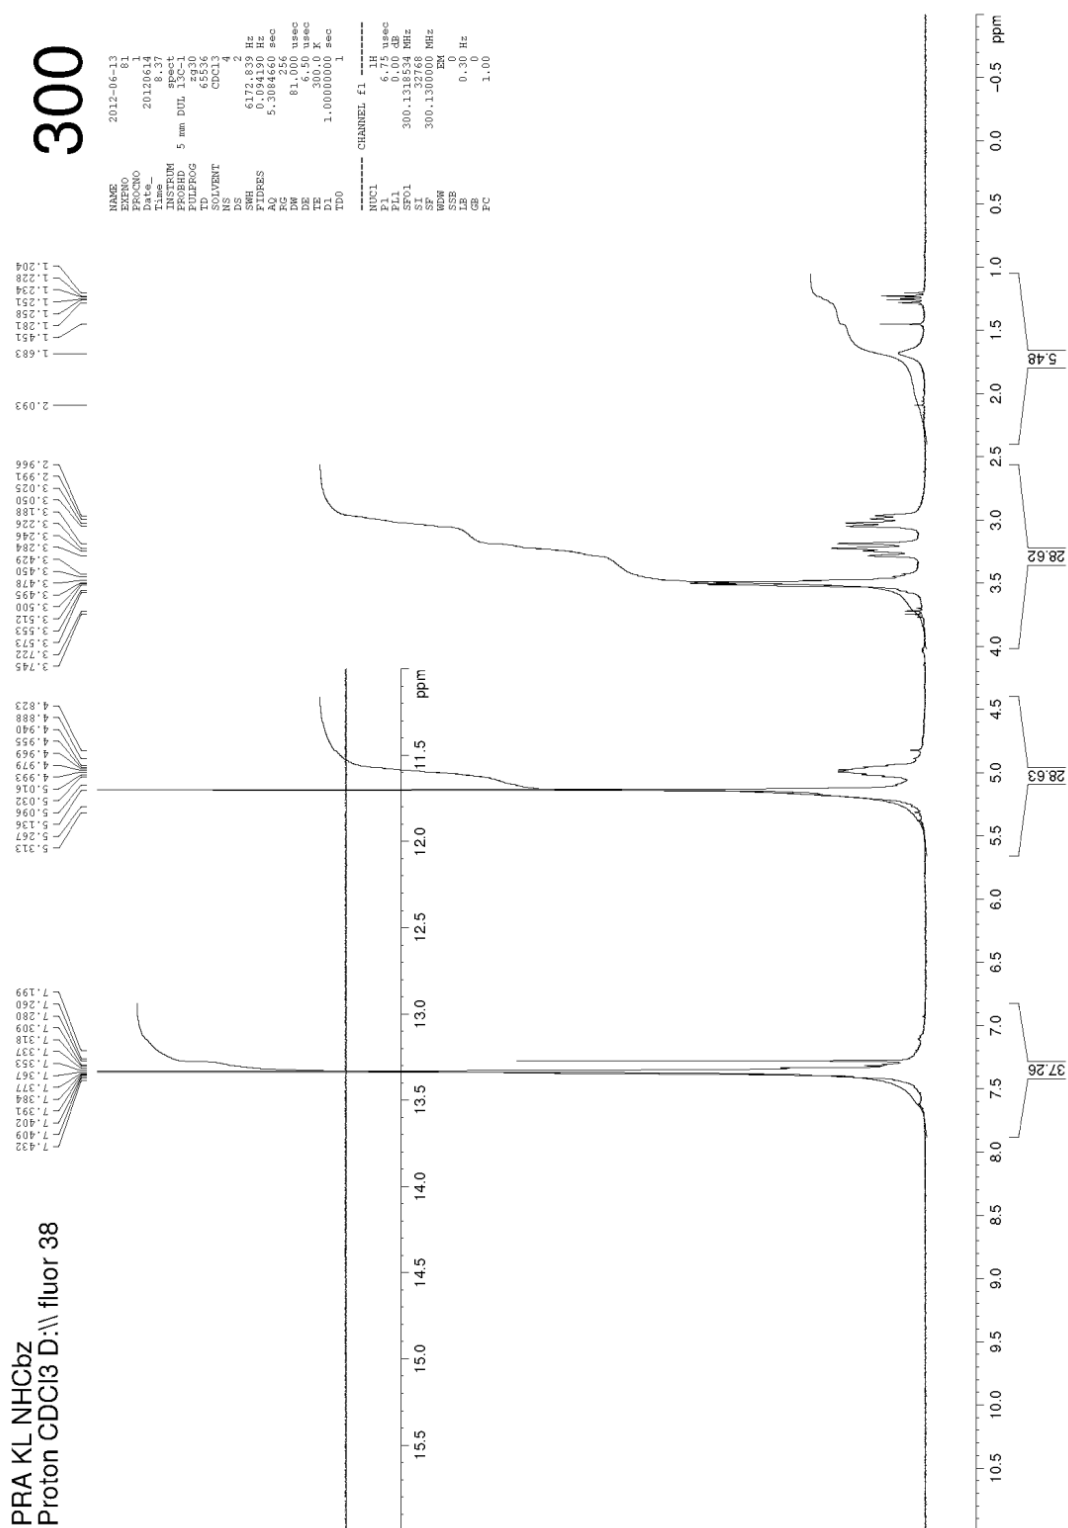

75

PRA KL NHCbz  
CARBONE CDCI3 D:\ fluor 38

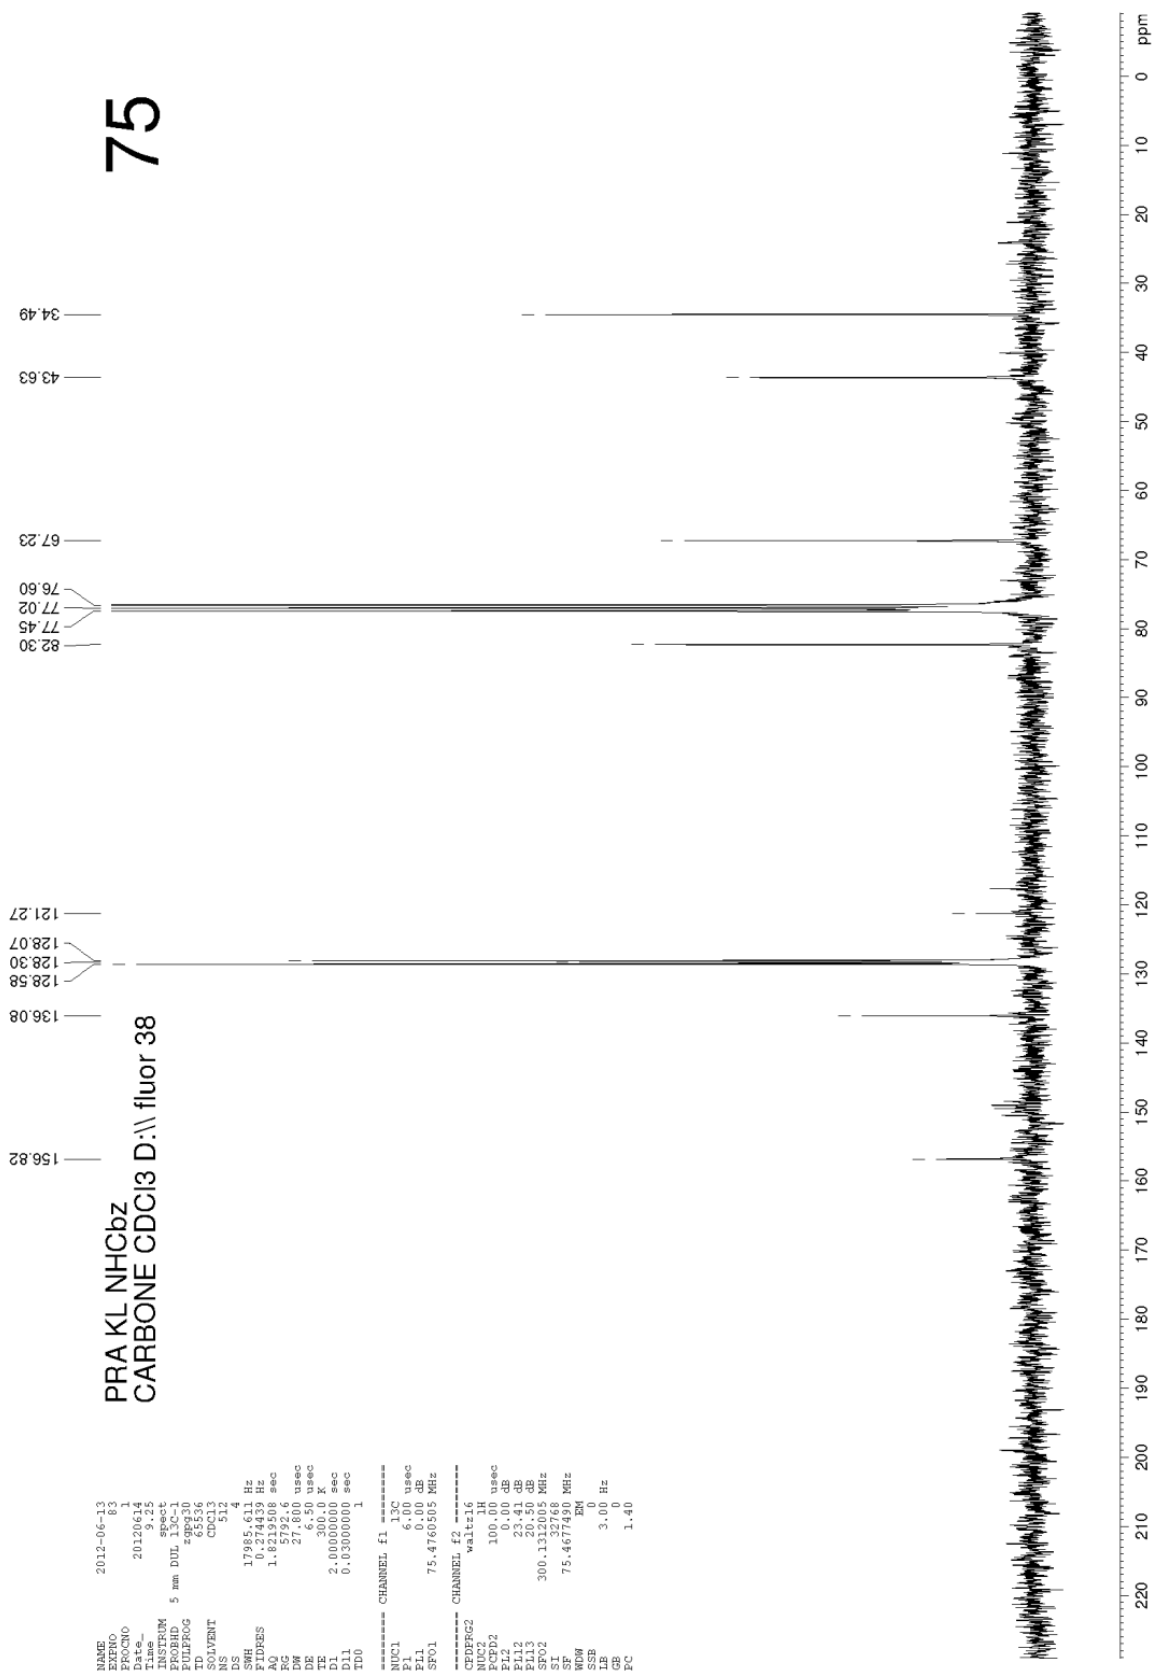

```
2012-06-13
NAME
PROCNO 81
Date_ 20120614
Time 9.25
INSTRM spect
PULPROG zgpg30
ID 65536
SOLVENT CDCl3
DS 314
SMH 17985.611 Hz
FIDRES 0.274439 Hz
AQ 1.862906 sec
RG 512
DM 27.800 usec
DE 6.50 usec
TE 300.0 K
D11 0.0300000 sec
D10 0.0300000 sec
TD0 1
===== CHANNEL f1 =====
NUC1 13C
P1 6.00 usec
PL1 0.00 dB
SF01 75.4760505 MHz
===== CHANNEL f2 =====
CFDPFG2 waltz16
NUC2 1H
P2 100.00 usec
PL2 0.00 dB
PL12 23.41 dB
PL13 20.50 dB
ST02 300.132268 MHz
SF 75.4677490 MHz
WDW EM
SSB 0
GB 0
PC 1.40
```

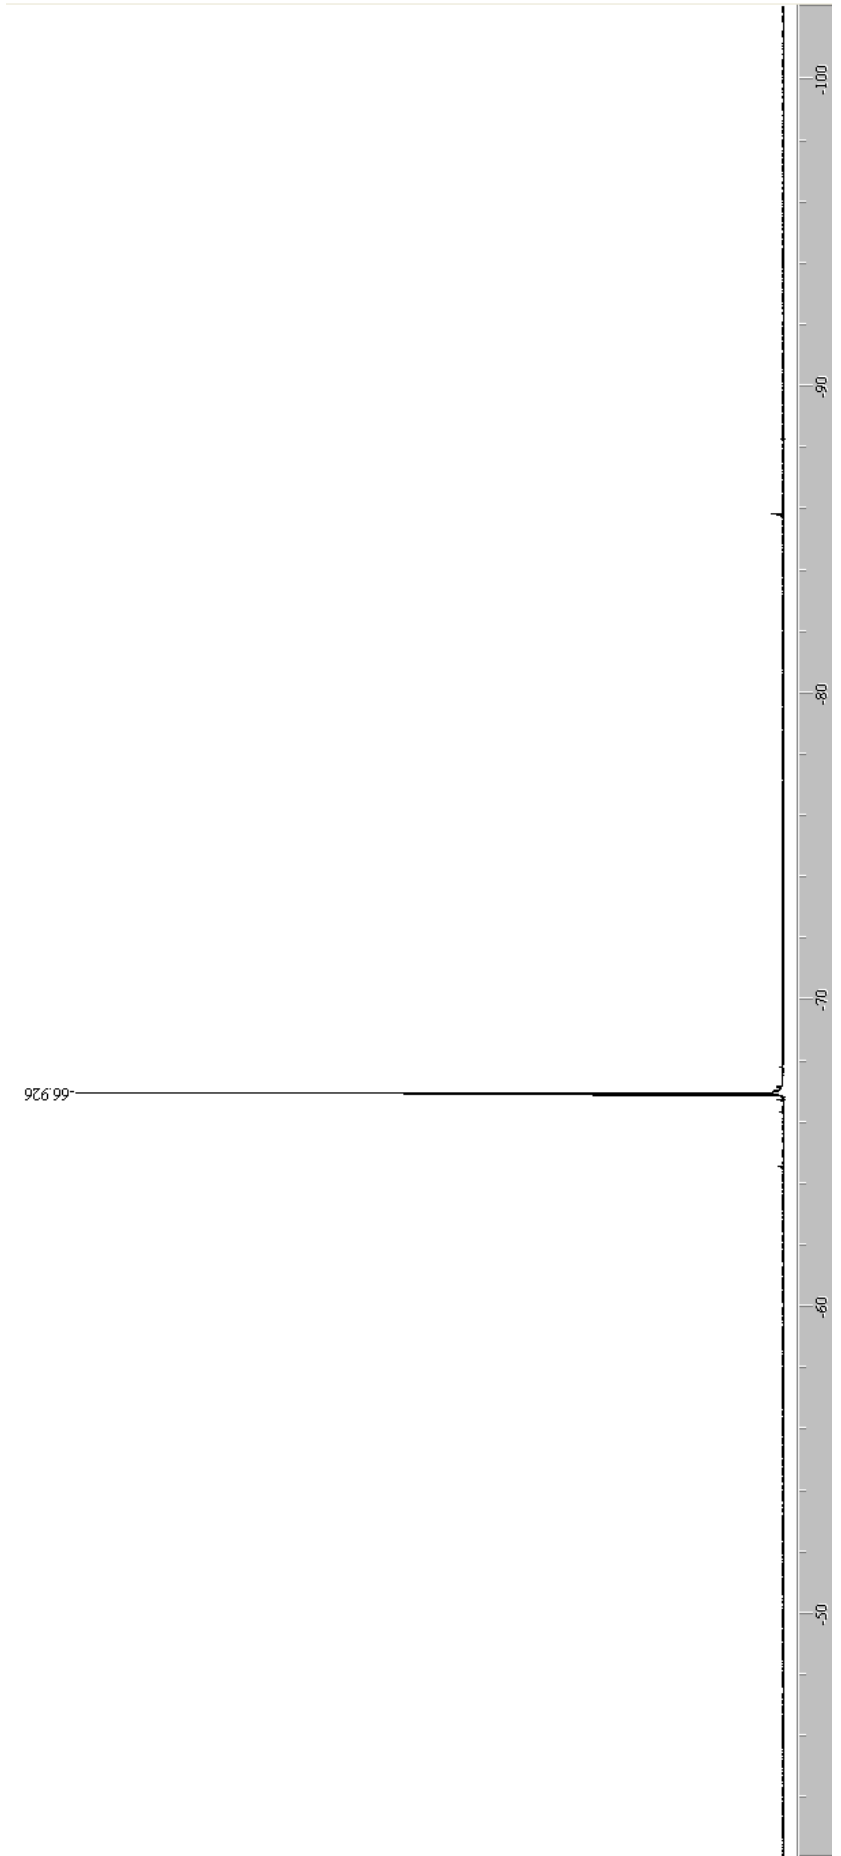

*tert*-Butyl (3-(trifluoromethyl)-4,5-dihydroisoxazol-5-yl)methylcarbamate (**1c**)

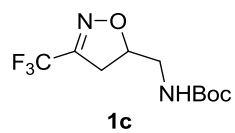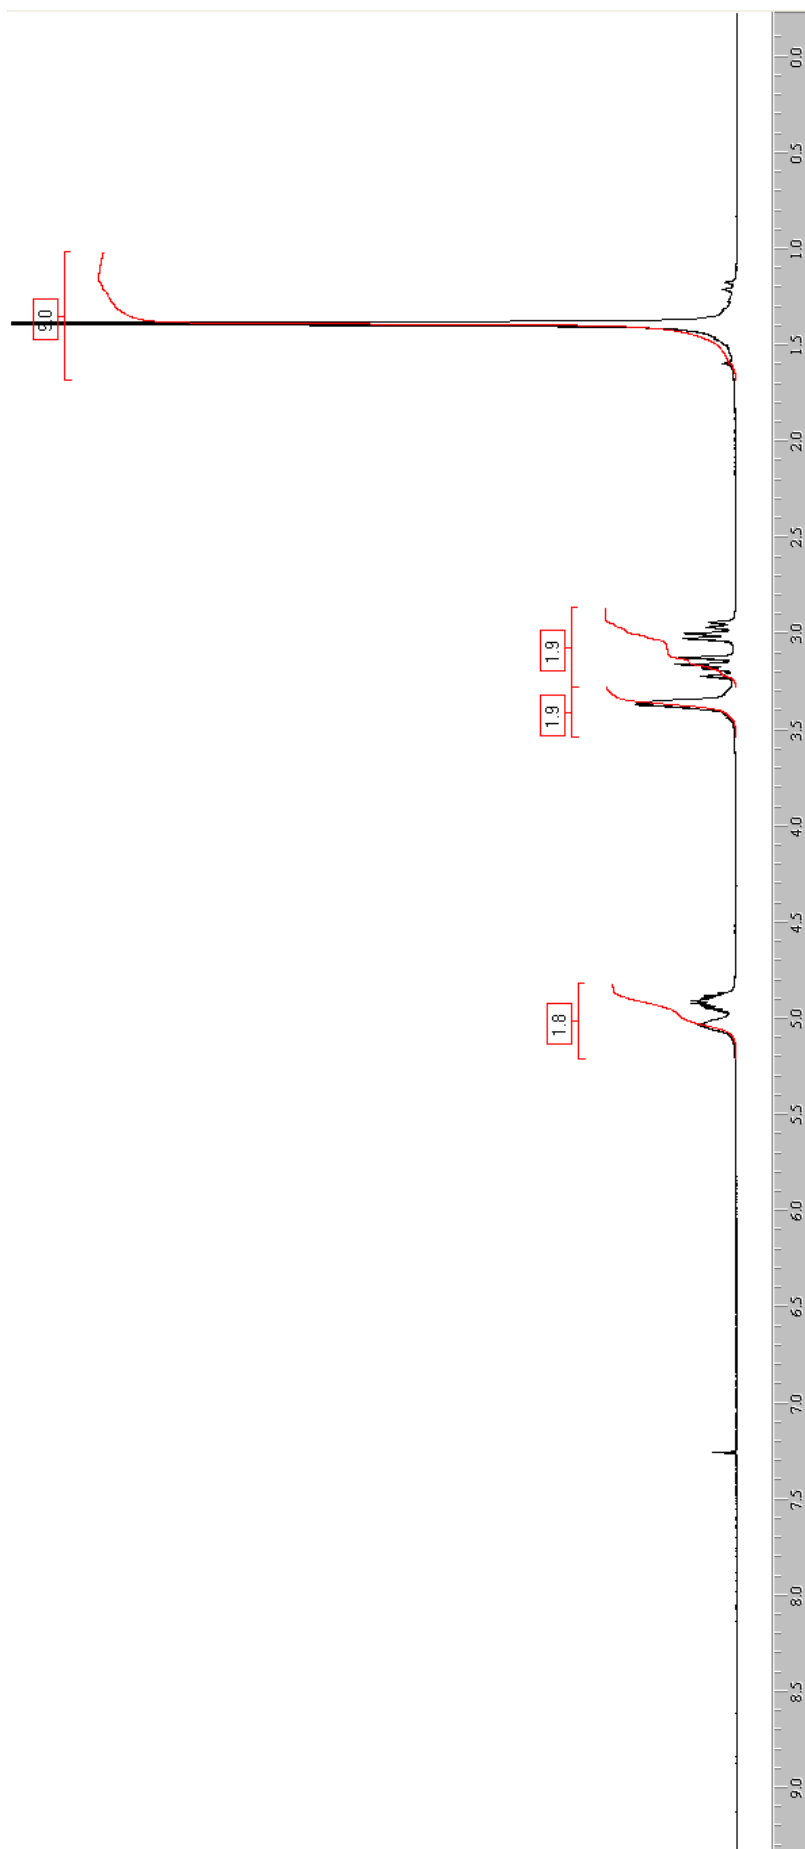



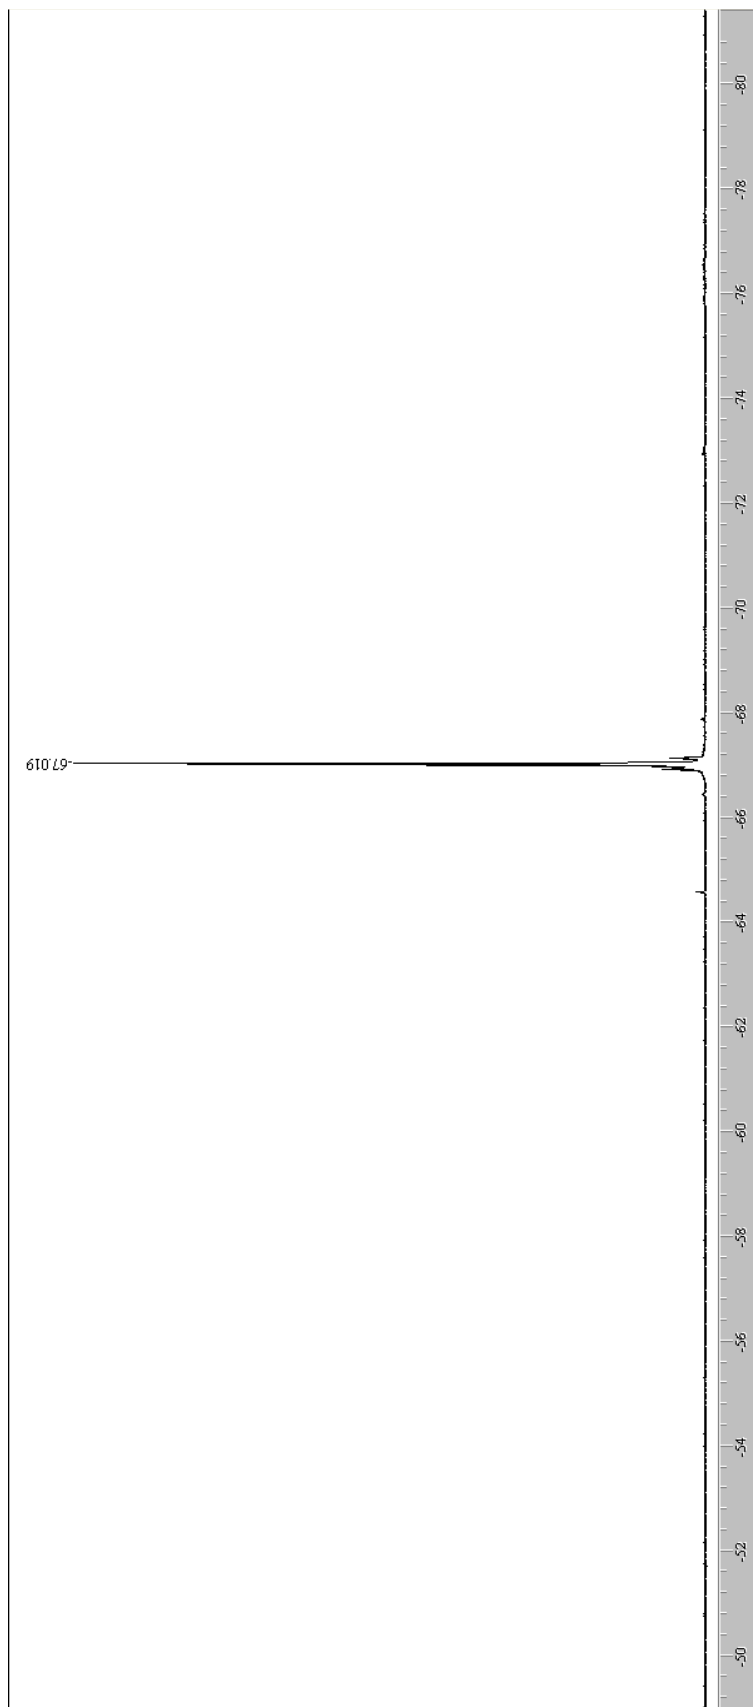

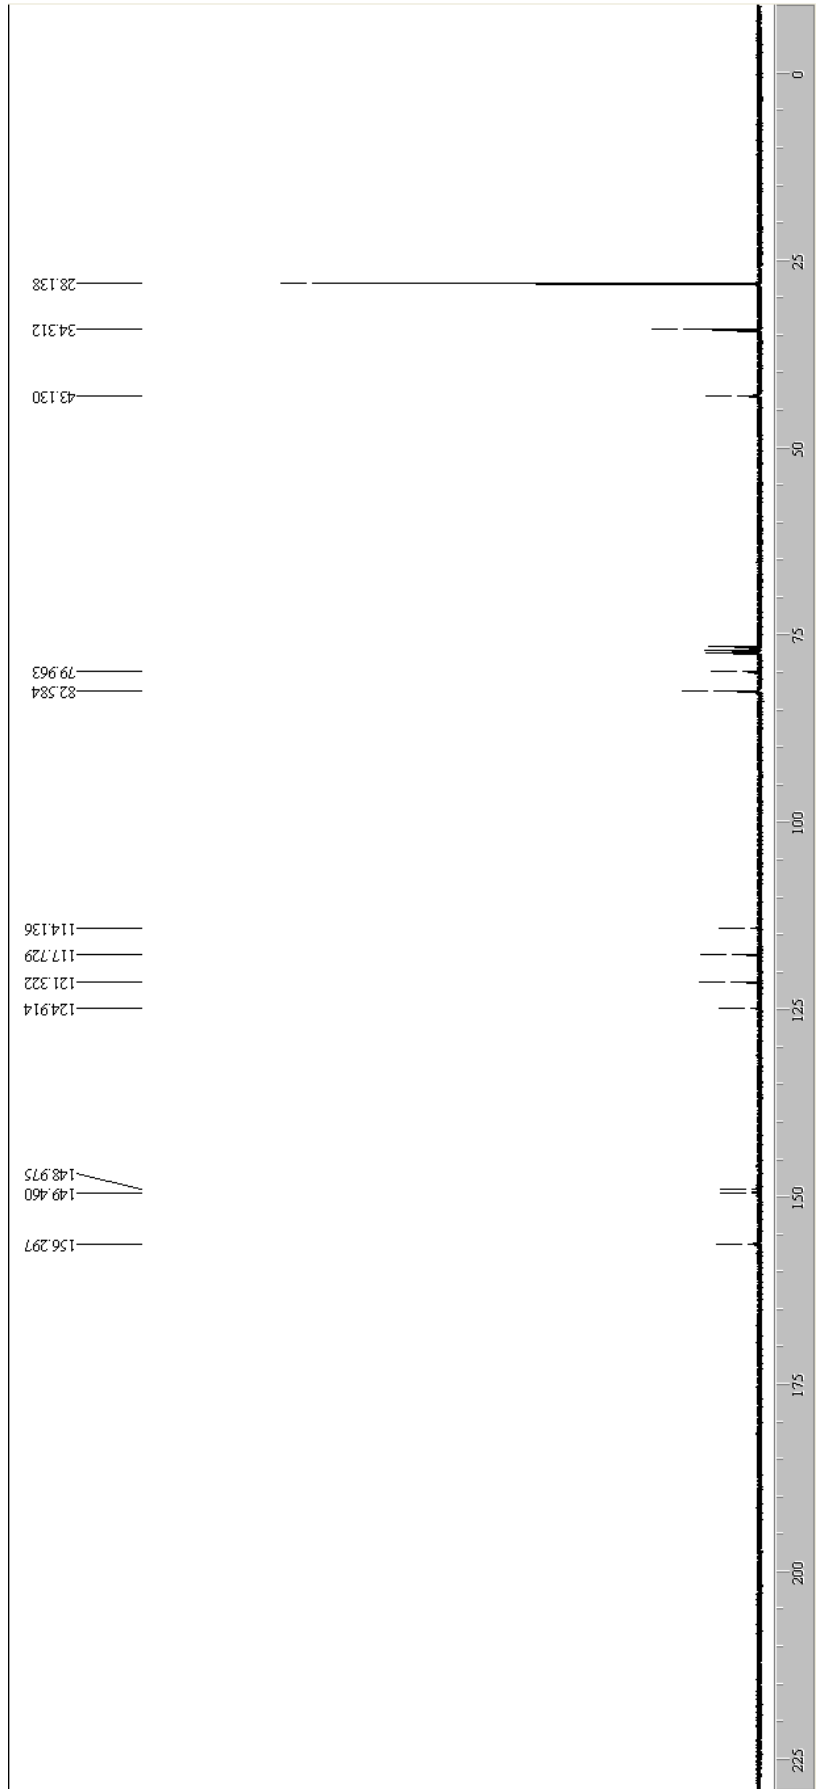

Ethyl 9-(3-(trifluoromethyl)-4,5-dihydroisoxazol-5-yl)nonanoate (**1d**)

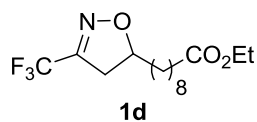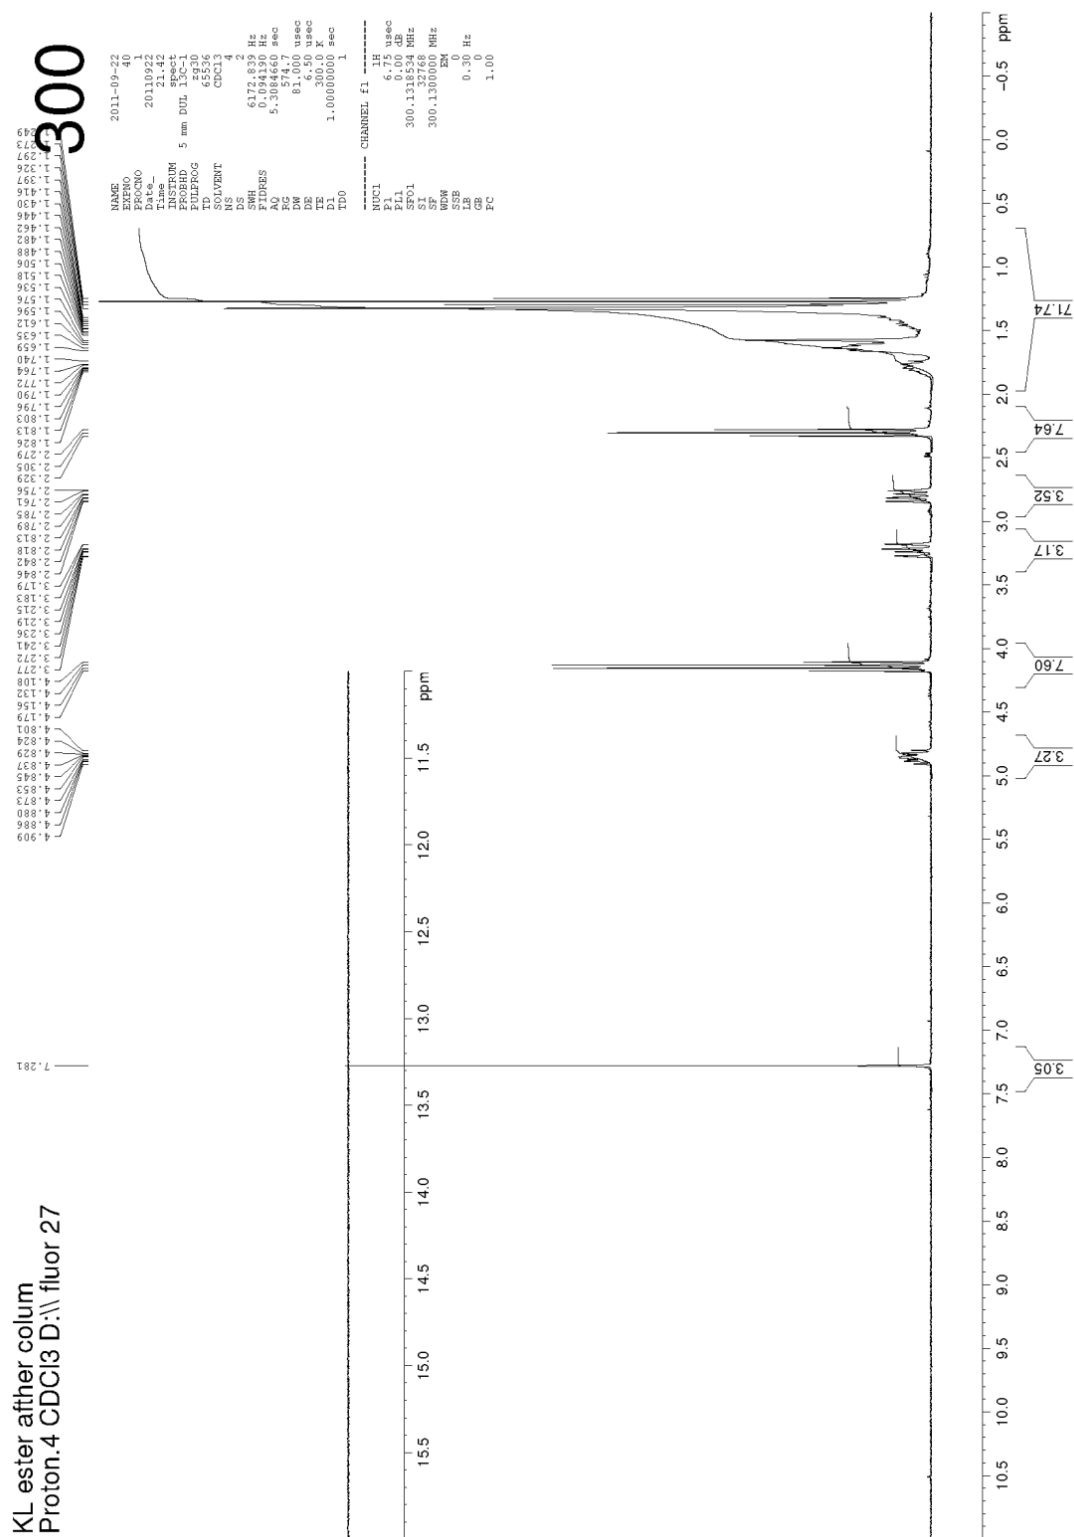

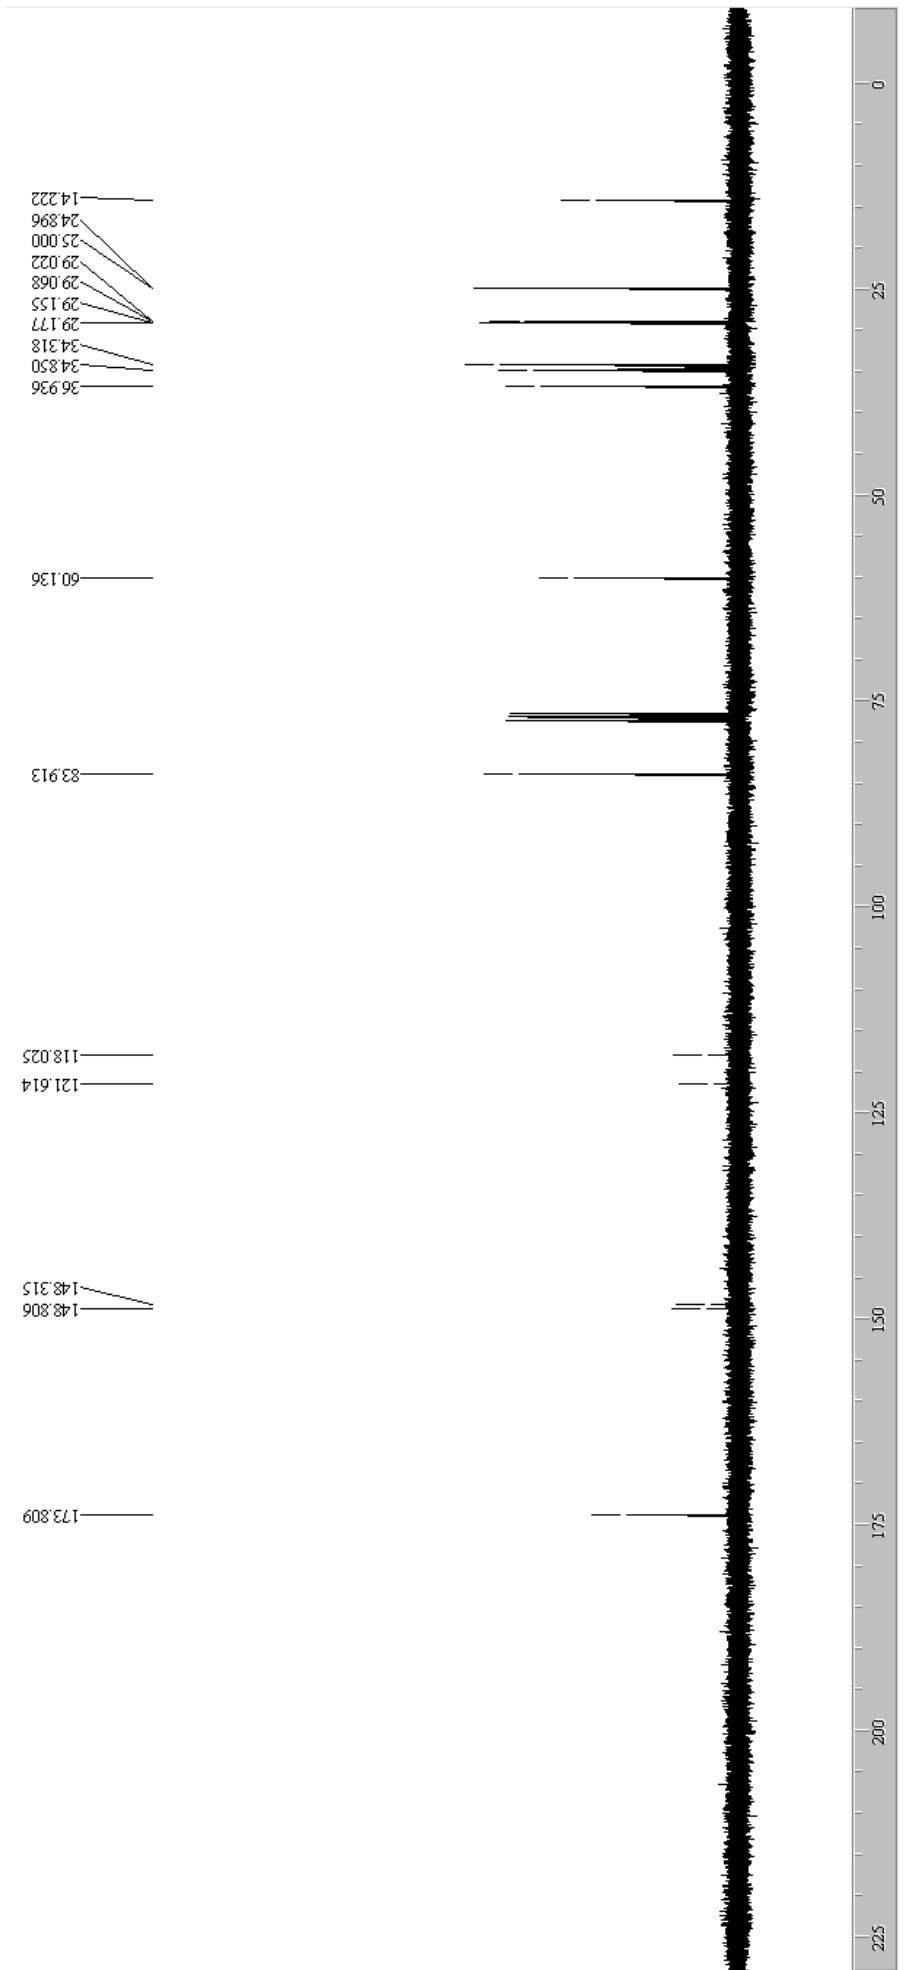

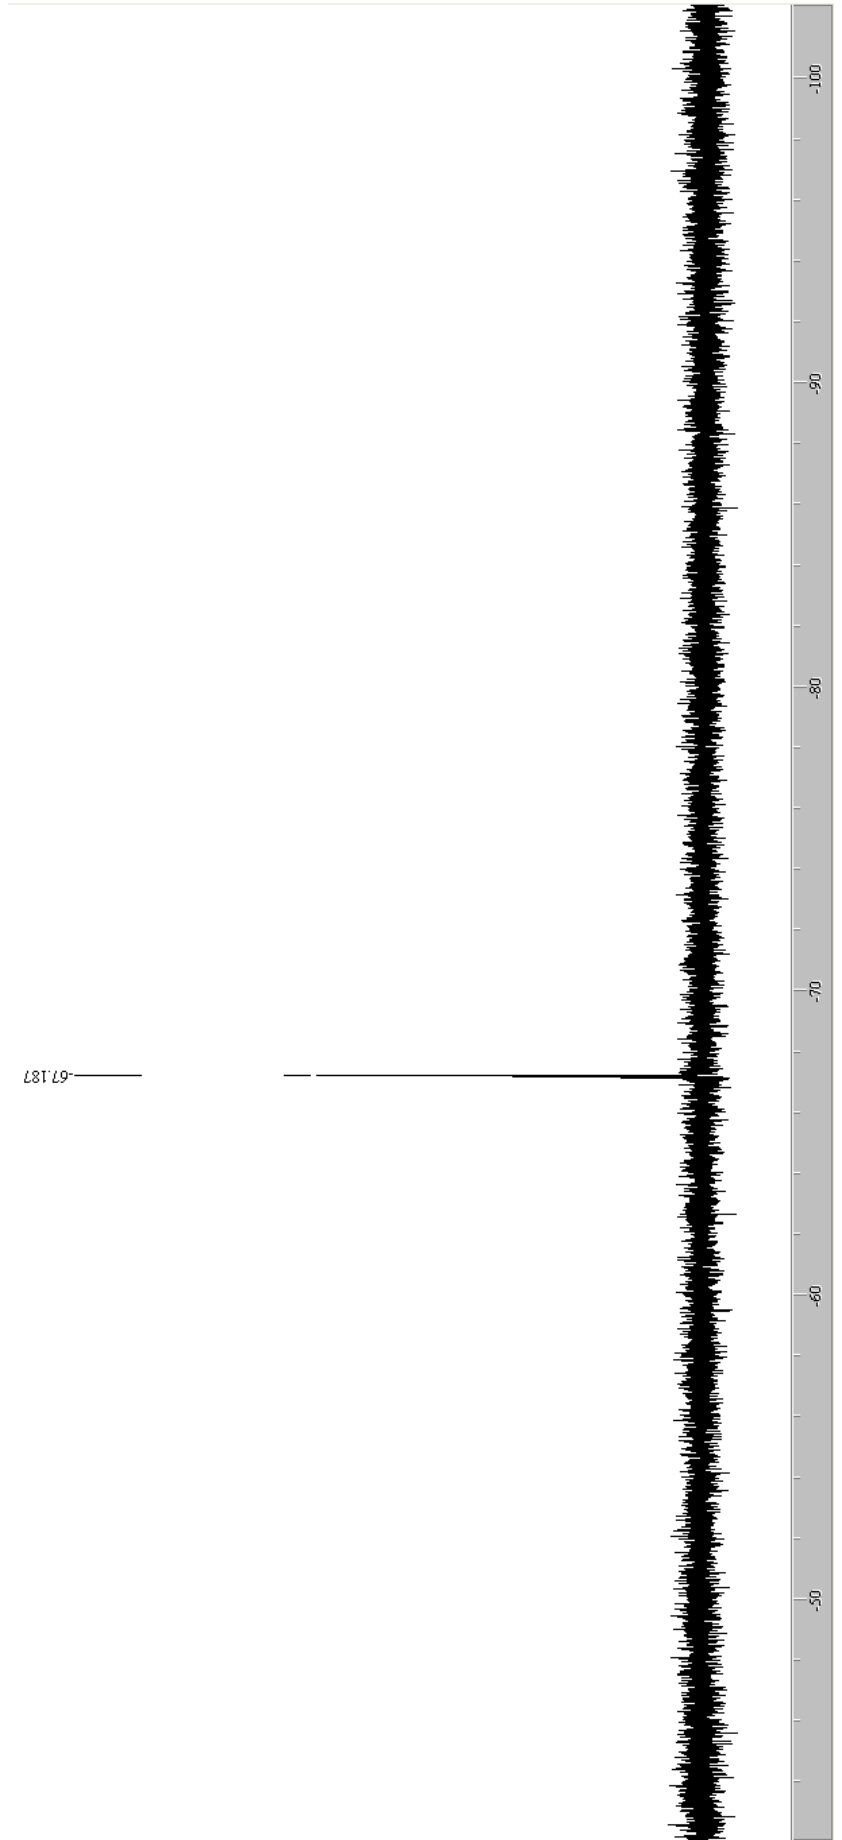

9-(3-(Trifluoromethyl)-4,5-dihydroisoxazol-5-yl)nonanoic acid (**1e**)

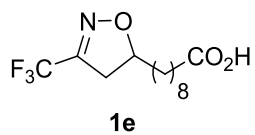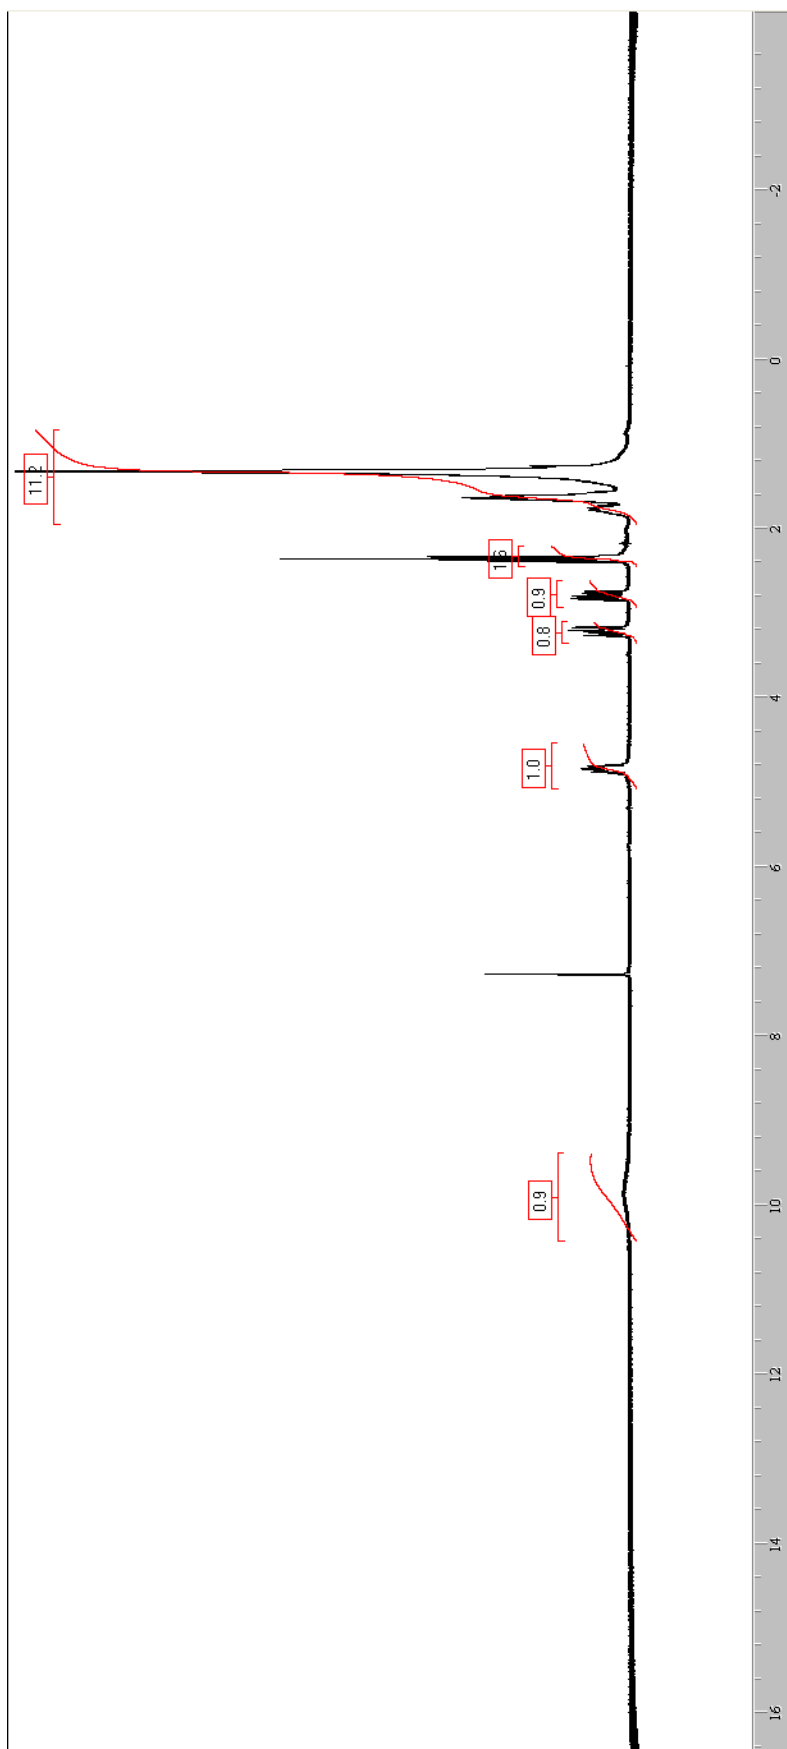

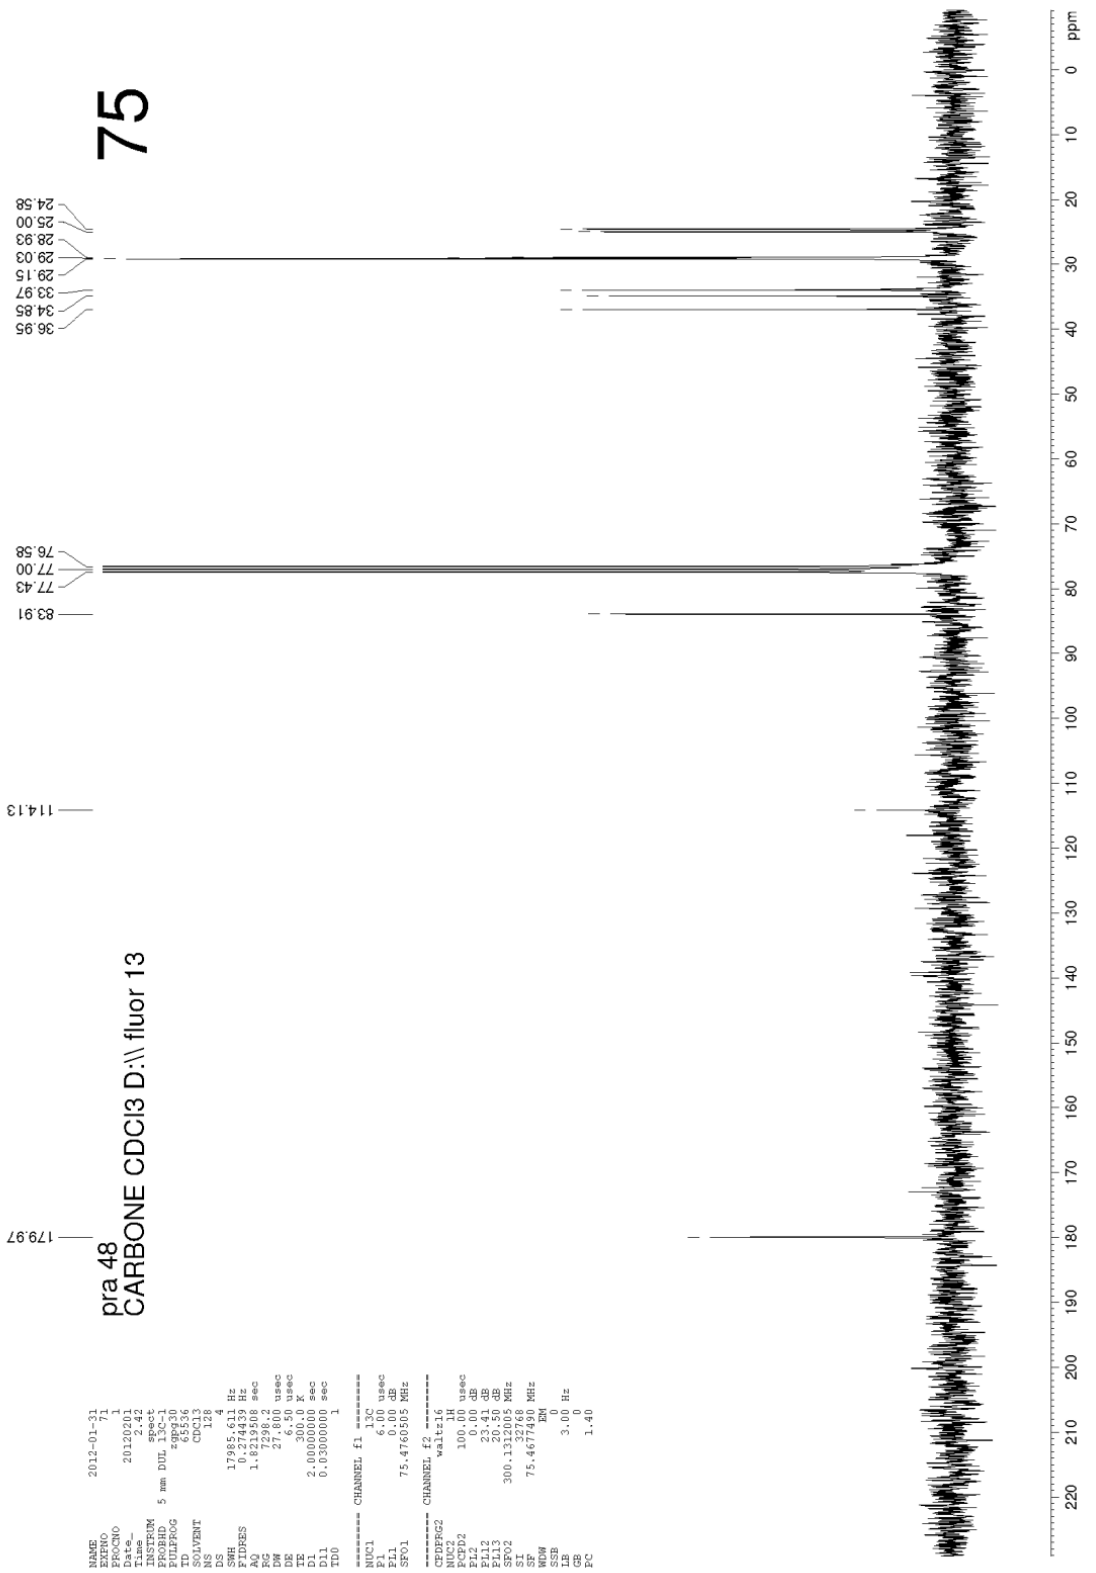

pra 48  
 CARBONE CDC13 D:\ fluor 13

75

179.97  
 114.13  
 83.91  
 76.58  
 77.43  
 77.00

36.95  
 34.85  
 33.97  
 29.15  
 29.03  
 28.93  
 25.00  
 24.58

```

NAME          2012-01-31
EXPERNO
PROCNO       20120201
Time         2.42
INSTRUM     spect
PROBHD      5 mm DUL 13C Q
PULPRG      zgpg30
ID          #5156
SOLVENT     CDCl3
DS          124
NS          124
SMH         17985.611 Hz
FIDRES      0.274433 Hz
RG          1.72982 sec
DW          27.800 usec
DE          30.50 usec
TE          300.132768 K
D1          2.00000000 sec
D11         0.03000000 sec
TD0         1

===== CHANNEL f1 =====
NUC1        13C
P1          6.00 usec
PL1         0.00 dB
SFO1        75.47760505 MHz

===== CHANNEL f2 =====
NUC2        1H
P2          100.10 usec
PL2         0.00 dB
SFO2        300.132768 MHz
=====
CEDEFG2    waitz16
NUC2       13C
P1         100.10 usec
PL1        0.00 dB
P112       23.41 dB
P113       30.50 dB
SFO1       300.132768 MHz
SF         75.4677490 MHz
=====
NUC1       13C
P1         3.00 Hz
PL1        0.00 dB
PC         1.40
  
```

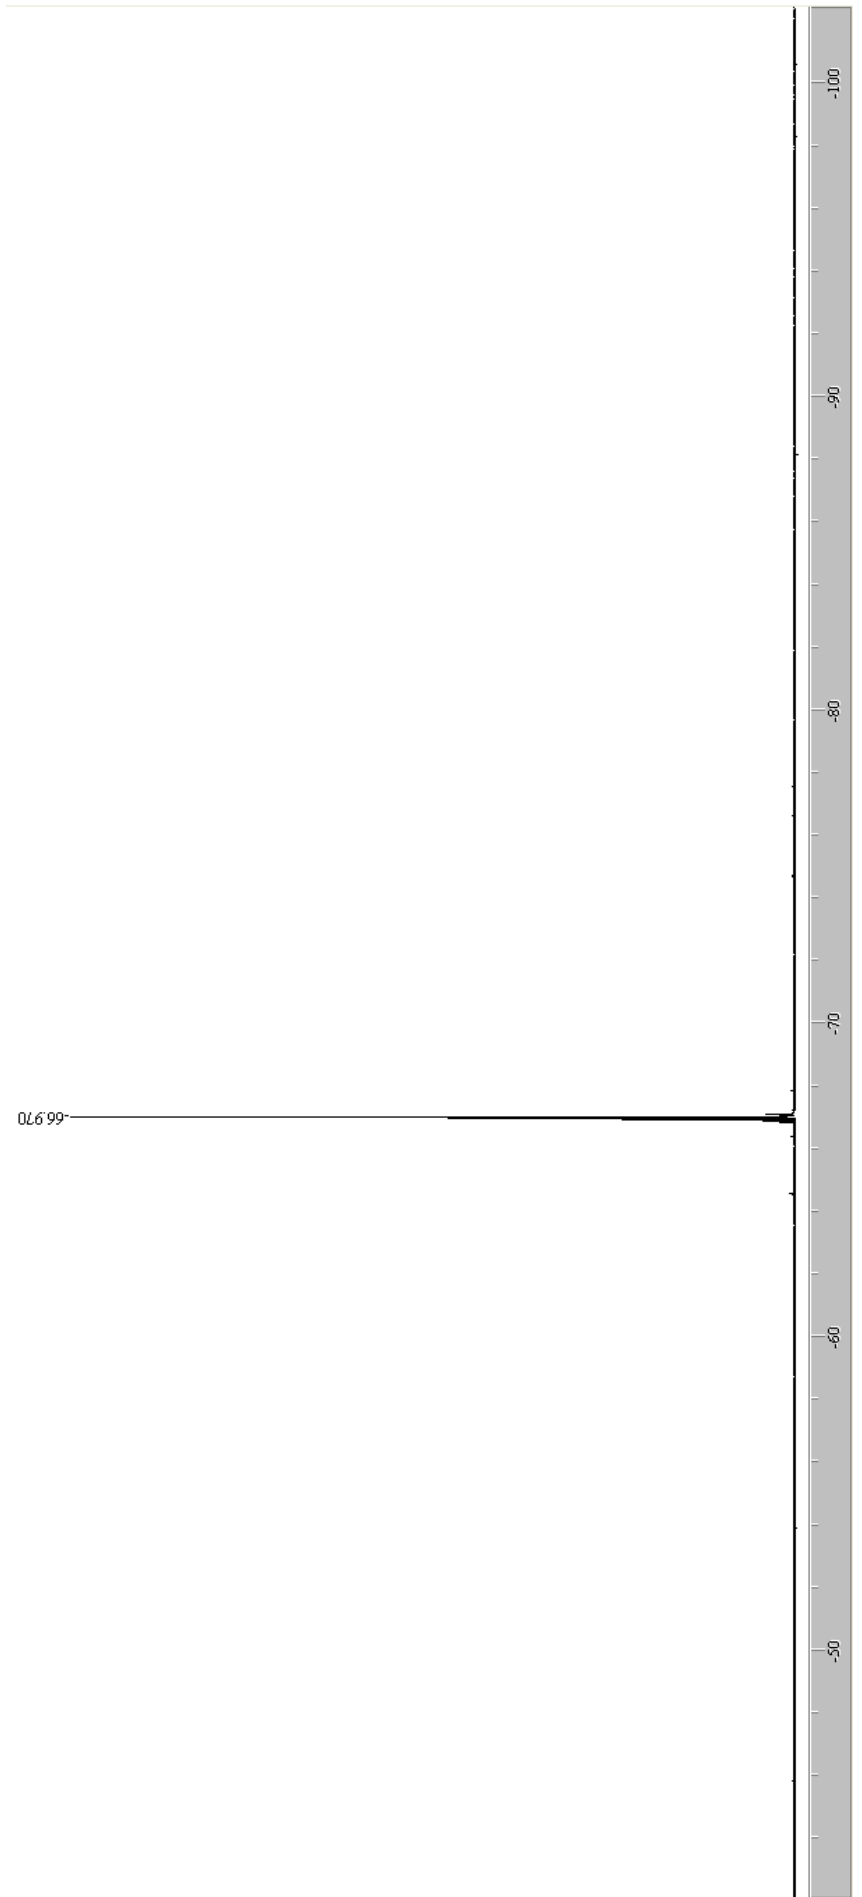



5-(4-Bromophenyl)-3-(trifluoromethyl)-4,5-dihydroisoxazole (**1f**)

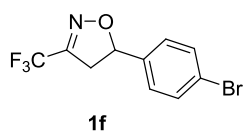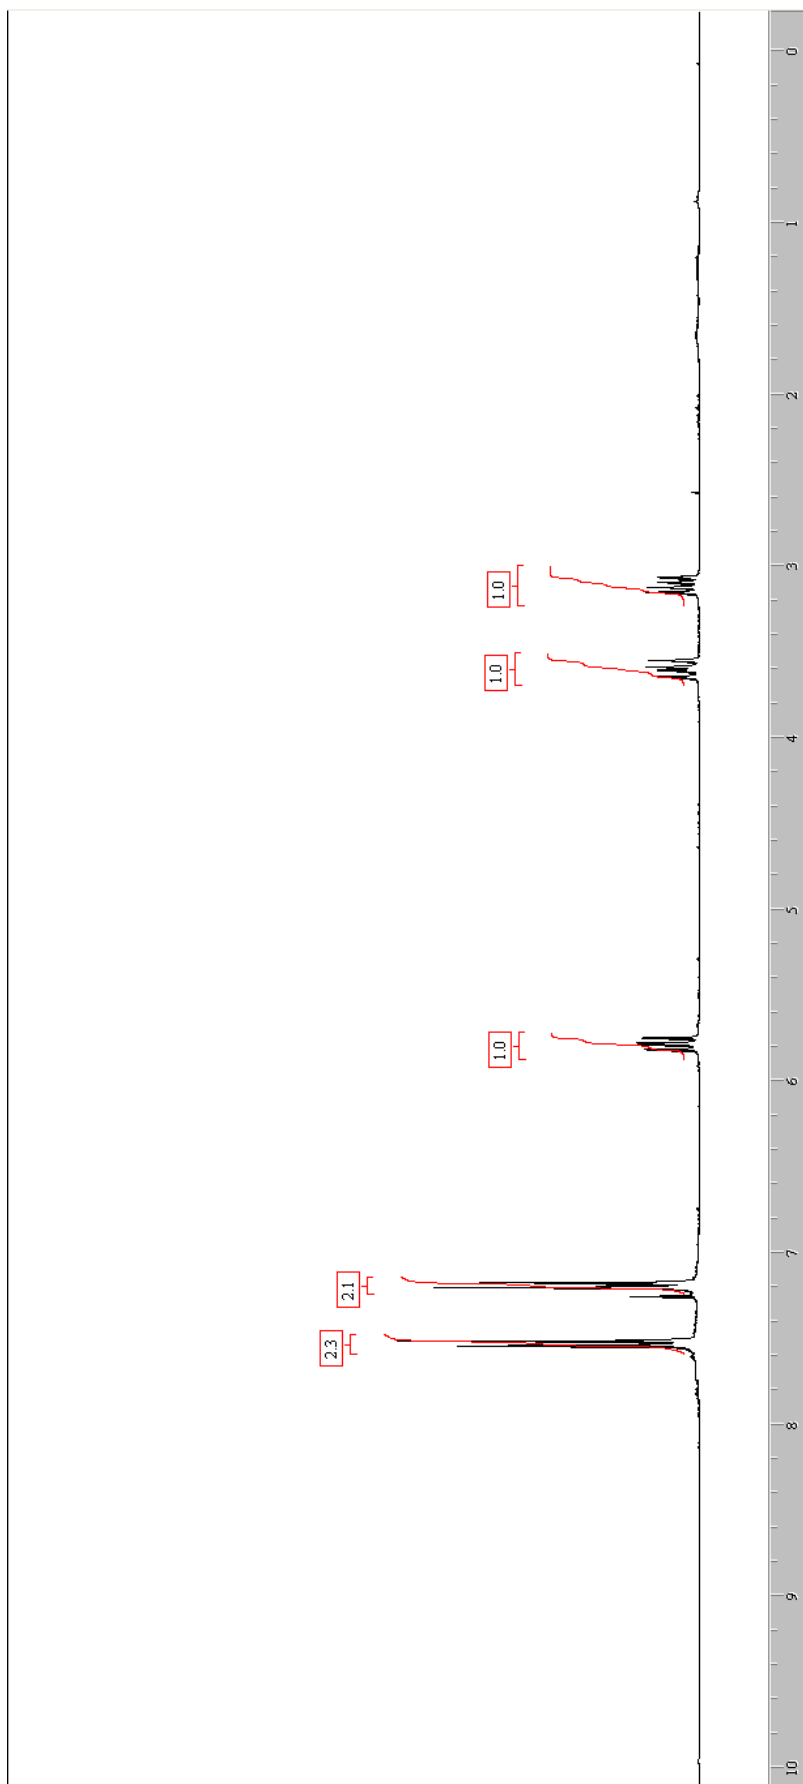

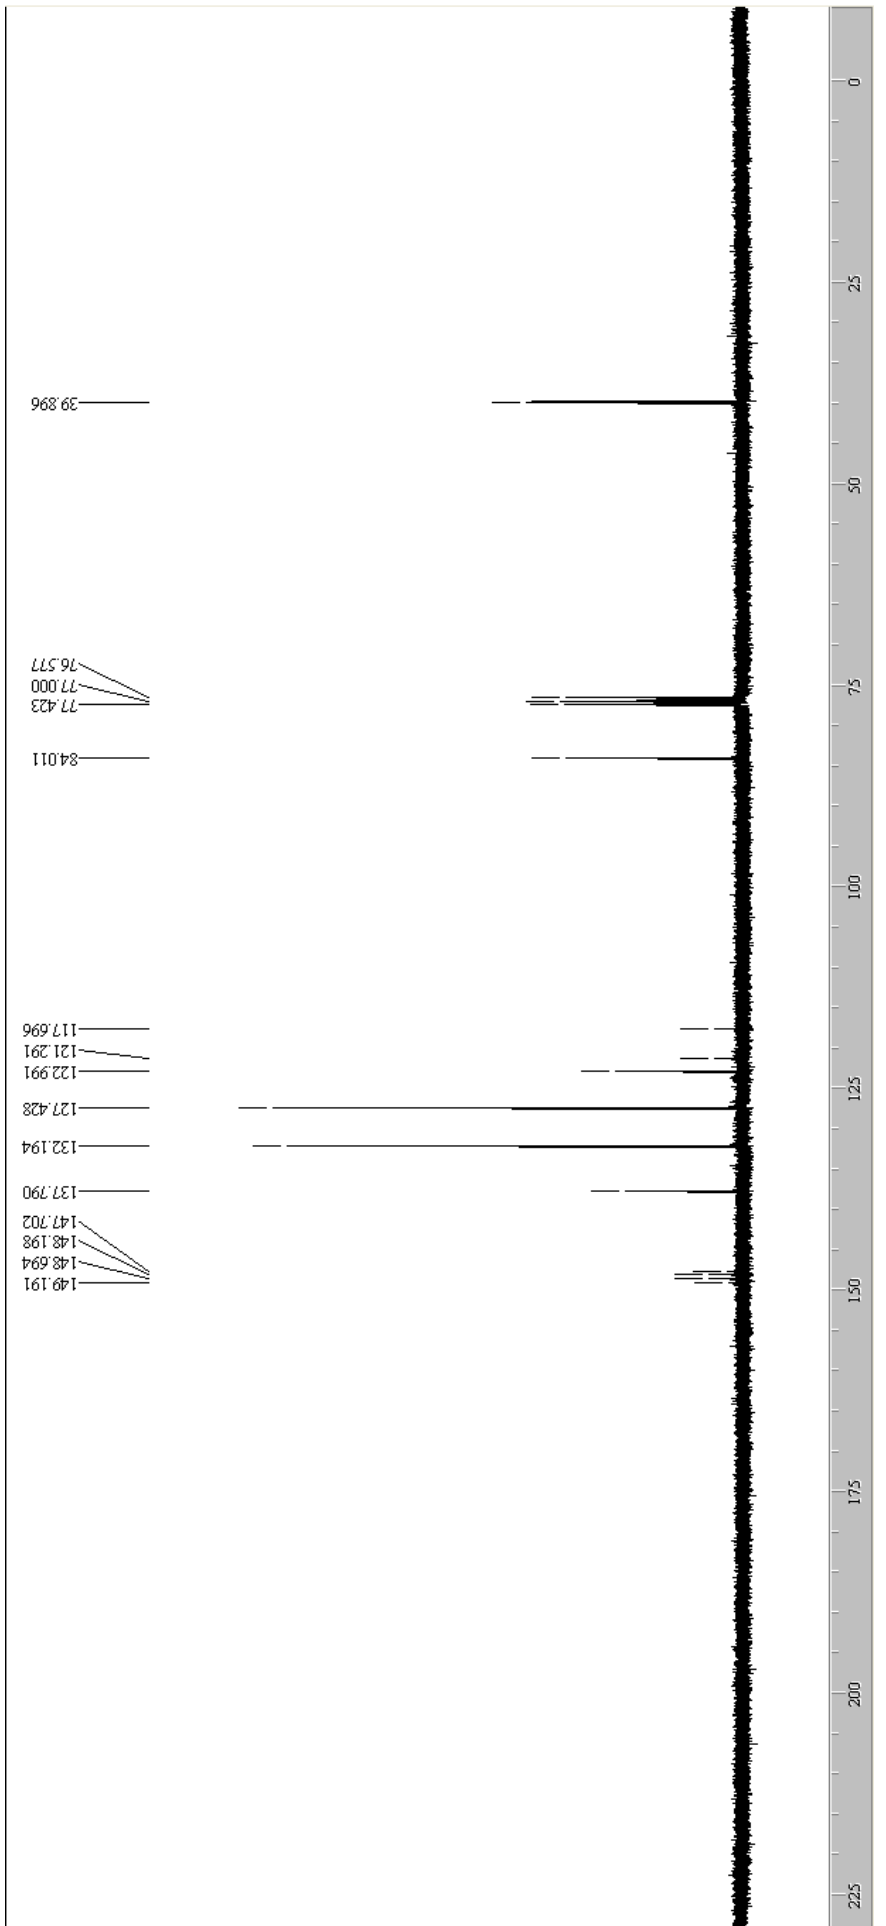

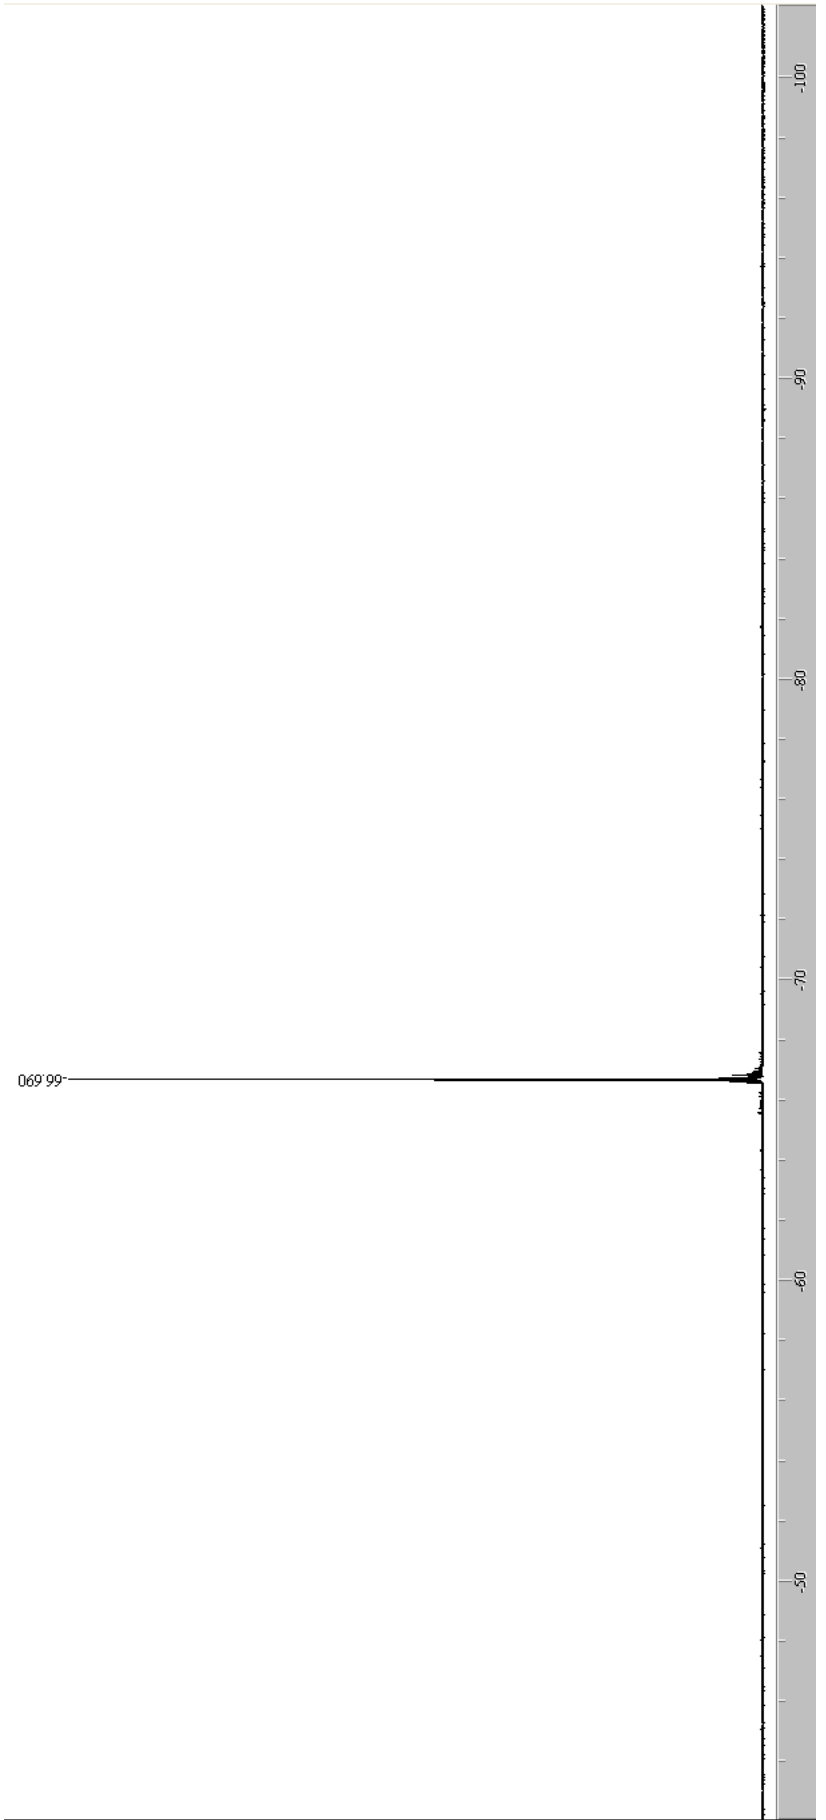

3-(Trifluoromethyl)-5-((trimethylsilyl)methyl)-4,5-dihydroisoxazole (**1g**)

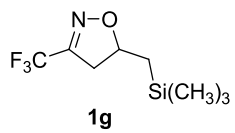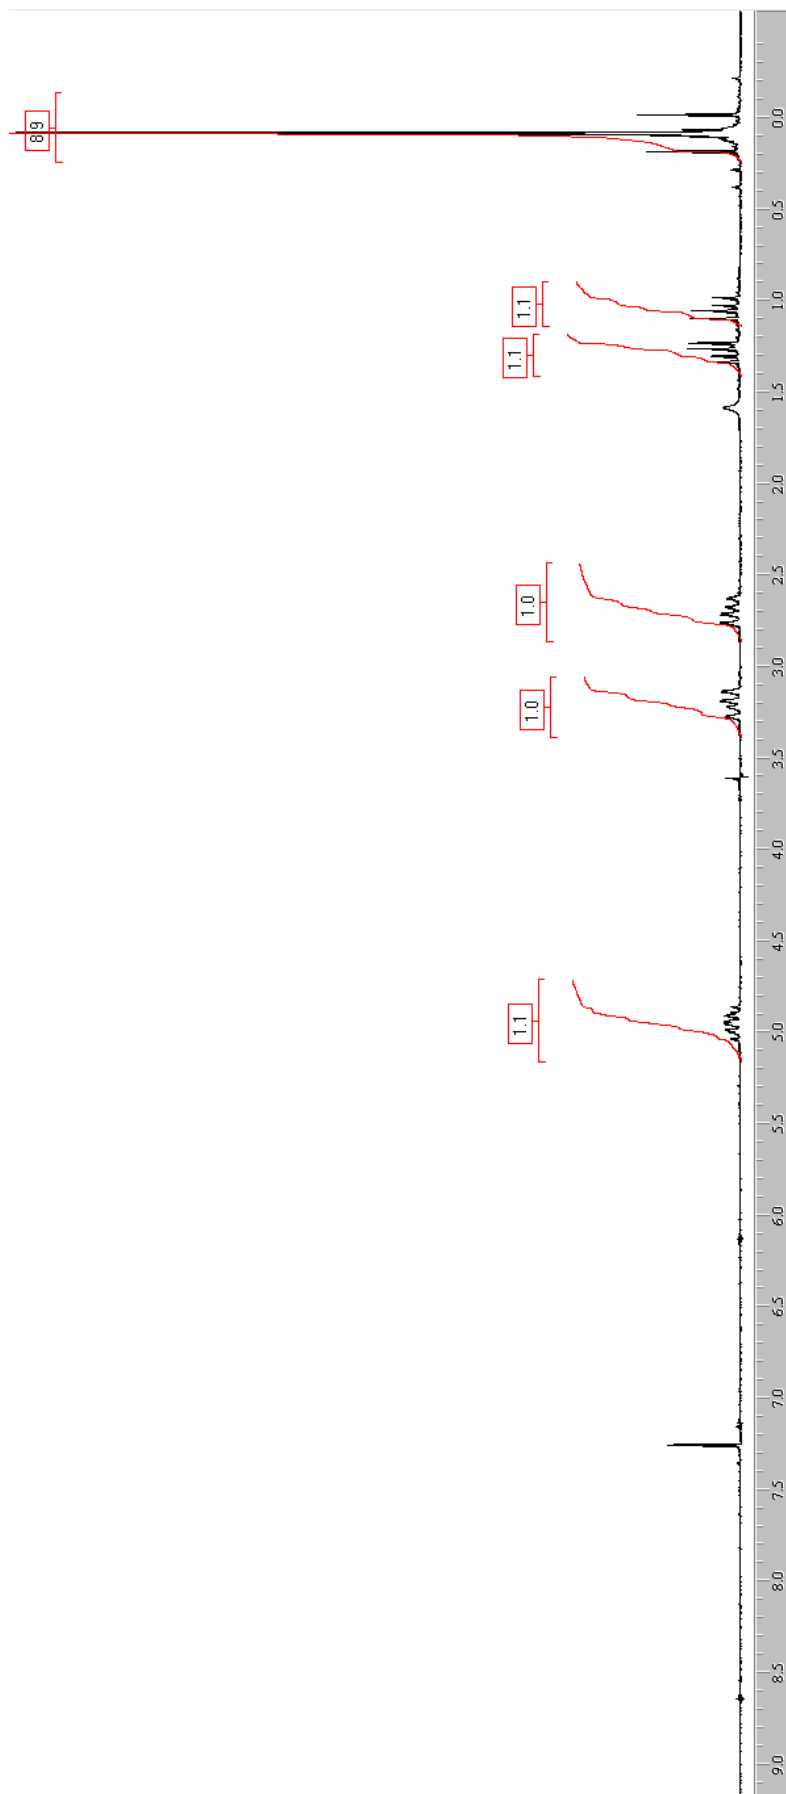

KL\_42 final  
 CARBONE CDCI3 D:\ fluor 38

```

NAME      2011-11-22
EXENO    132
PROCNO   1
Date_    2011124
Time_    6.21
INSTRUM  spect
PROBHD   5 mm DUL 13C-1
PULPROG  zgpg30
ID       65536
SOLVENT  CDCl3
DS       1.4
SMH      17985.611 Hz
FIDRES   0.274439 Hz
AQ       1.8219508 sec
RG       327.600
DM       27.800 usec
DE       6.50 usec
TE       300.0 K
D1       2.00000000 sec
D11      0.03000000 sec
TD0      1
  
```

```

===== CHANNEL F1 =====
NUC1     13C
P1       120 usec
PL1      0.00 dB
SF01     75.4760505 MHz
  
```

```

===== CHANNEL I2 =====
CHRG2    waltz16
NUC2
PCPD2    100.00 usec
PL2      0.00 dB
PL12     23.41 dB
SF02     300.1332005 MHz
SI       32768
SF       75.4676597 MHz
WDW      EM
GB       3.00 Hz
L2B      0
GB       0
FC       1.40
  
```

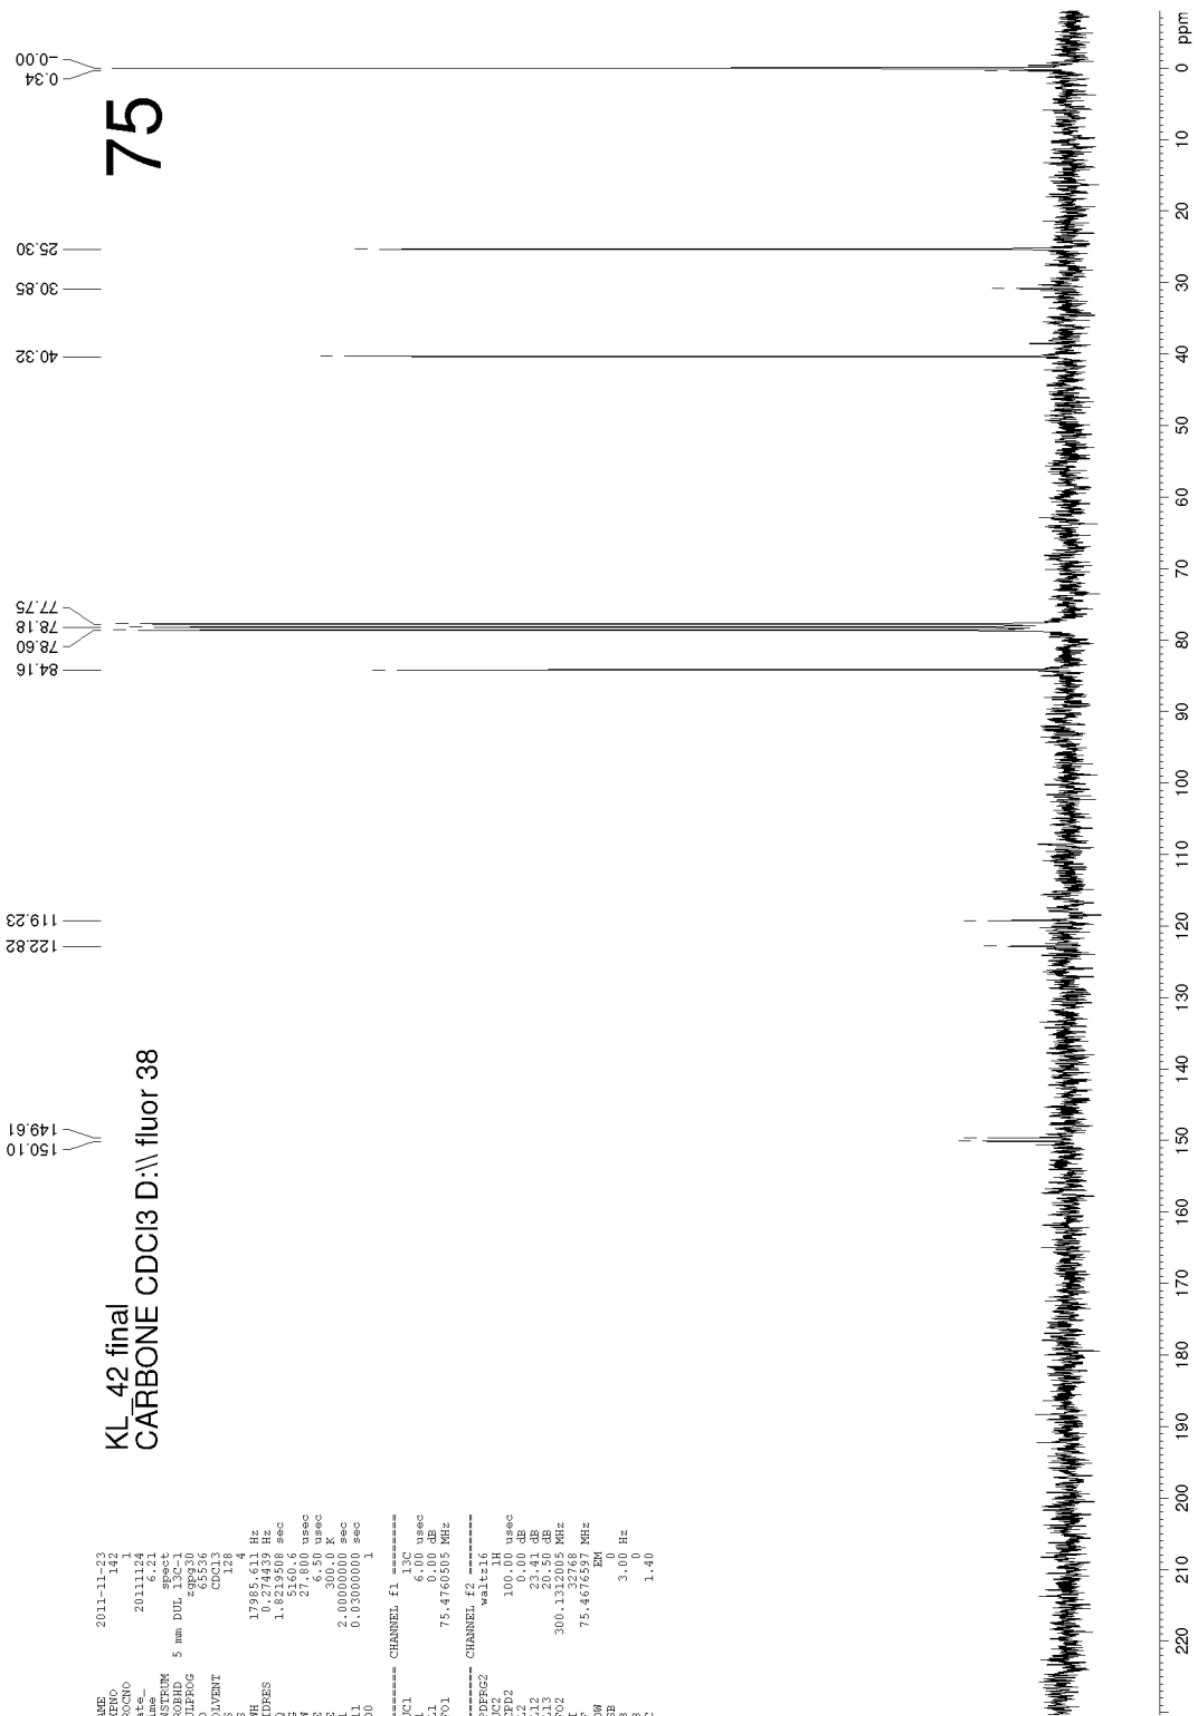

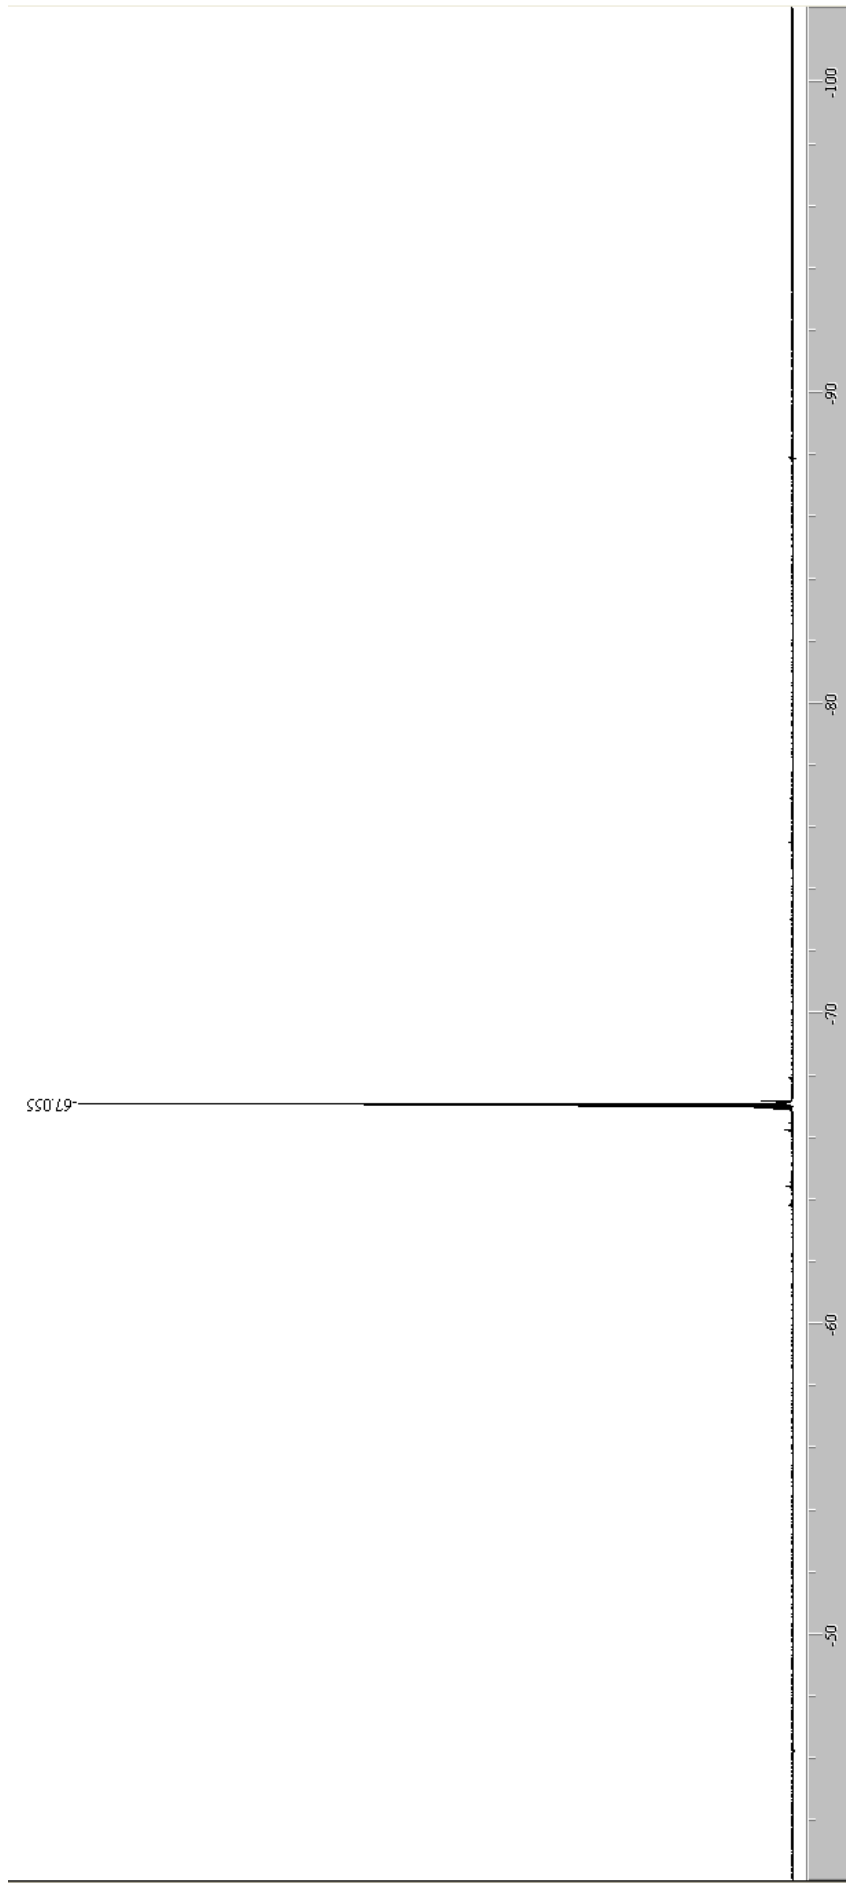

3-(Trifluoromethyl)-3a, 4, 5, 6, 7, 8, 9a-octahydrocycloocta[*d*]isoxazole (**1h**)

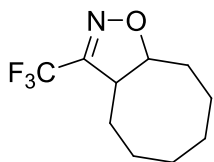

**1h**

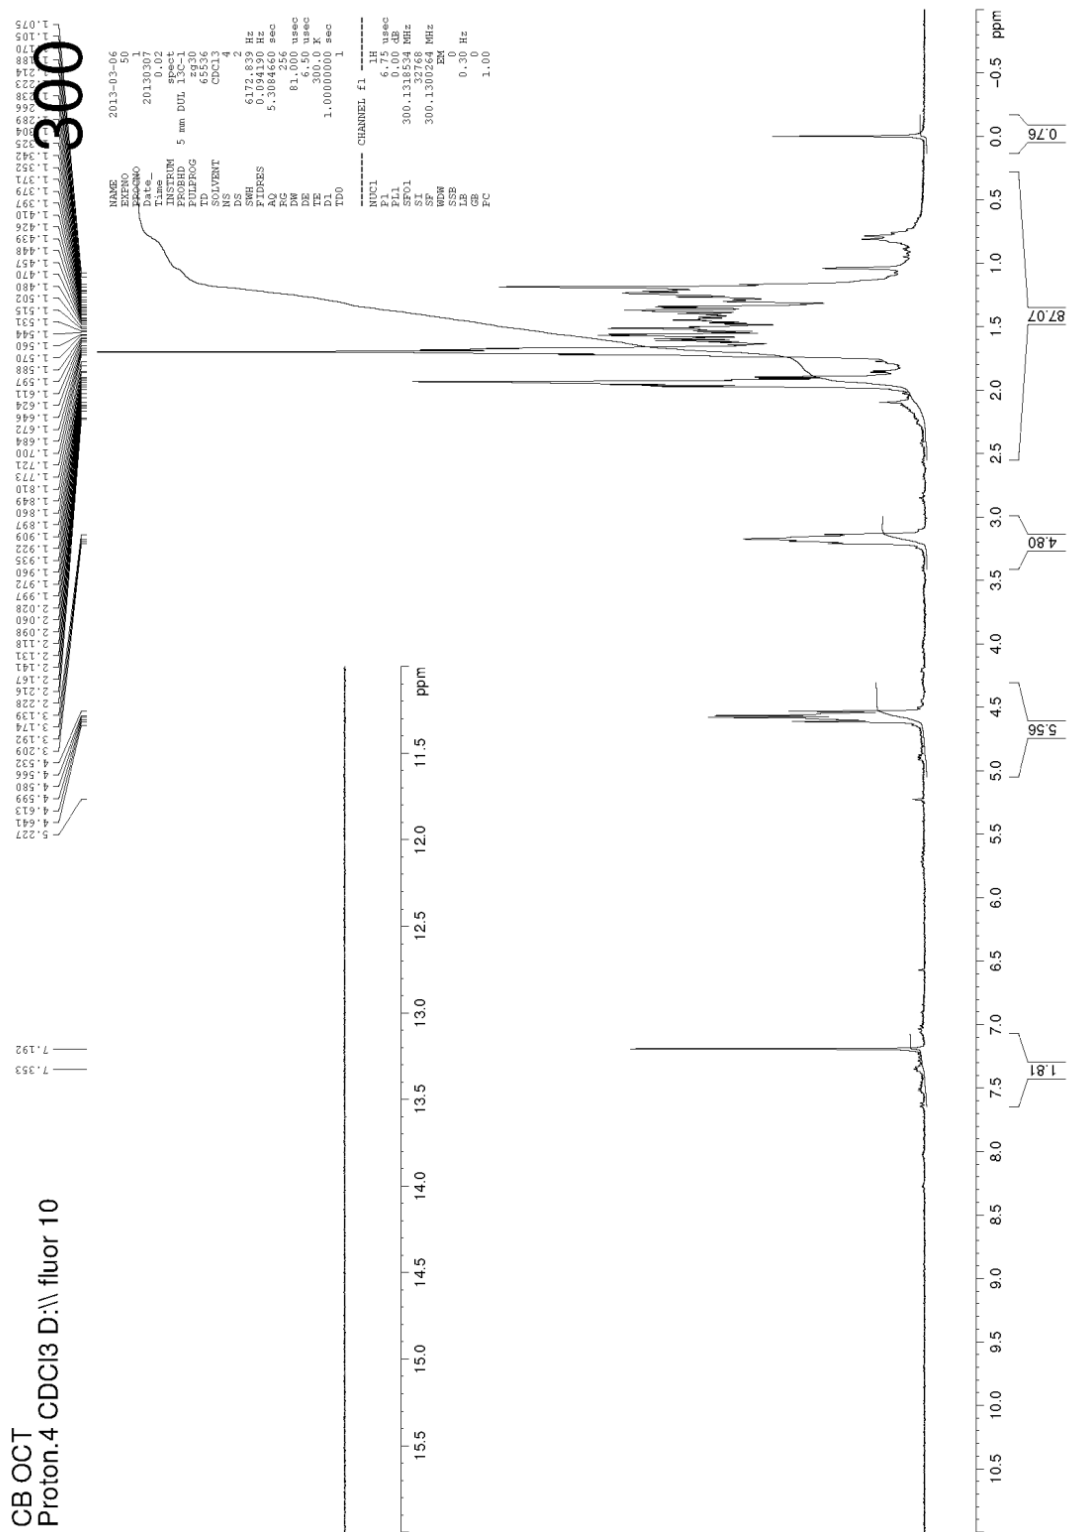

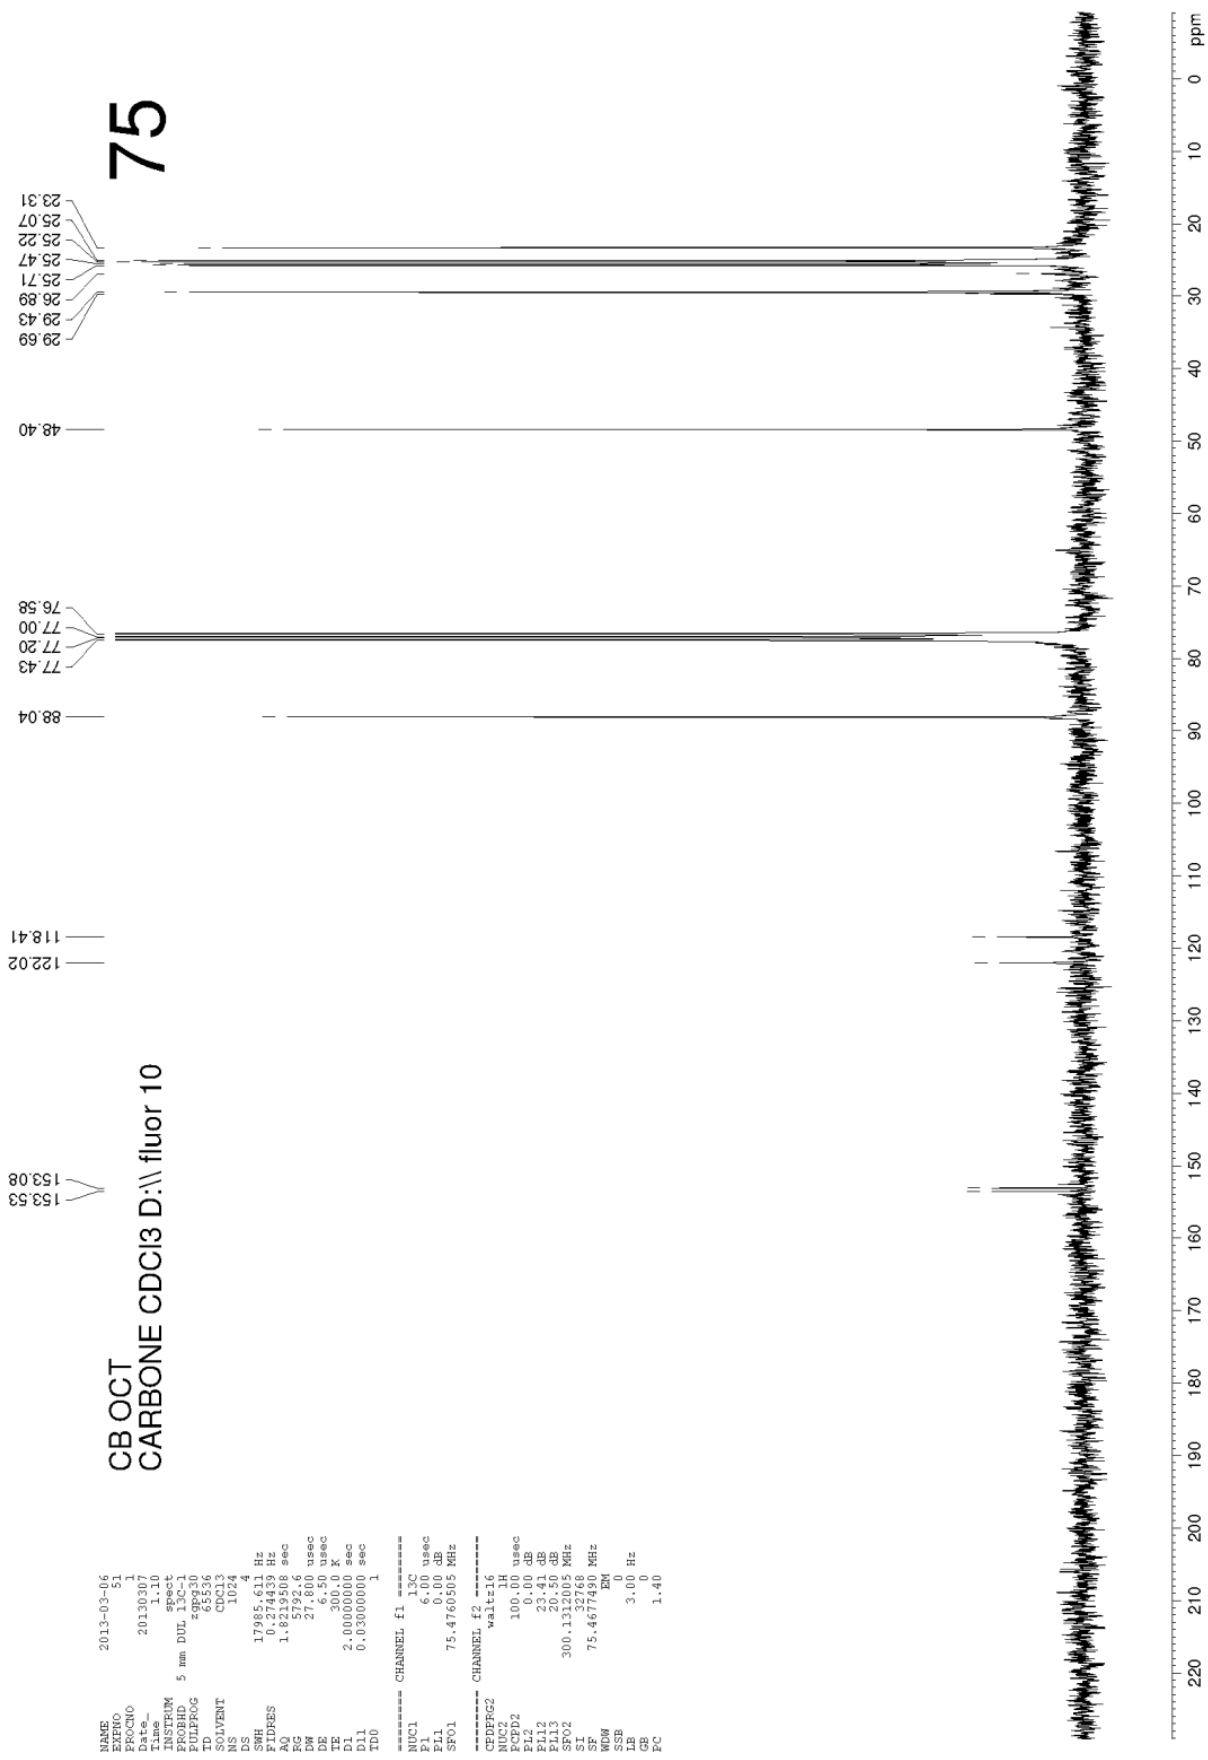

**CB OCT  
CARBONE CDCI3 D:\ fluor 10**

```

NAME          2013-03-06
EXPNO         51
PROCNO        1
Date_         20130307
Time          1.10
INSTRUM       spect
PROBHD        5 mm DUL 13C-1
PULPROG       zgpg30
SOLVENT       CDCl3
NS            1024
DS            4
SWHES        17955.611 Hz
AQ           0.18219508 sec
RG           5792.6
DM           27.800 usec
DE           6.50 usec
DI           0.00000000 sec
D11          0.03000000 sec
TD0          1
----- CHANNEL f1 -----
NUC1          13C
P1            6.00 usec
PL1           0.00 dB
SFO1          75.4760505 MHz
----- CHANNEL f2 -----
CEDEPRG2     waltz16
NUC2          1H
FCPD2        100.00 usec
FL2           0.00 dB
SFO2          300.1312005 MHz
SI            32768
SF            75.4677490 MHz
SFO3          3.00 Hz
LB            0
GB            0
FC            1.40
  
```



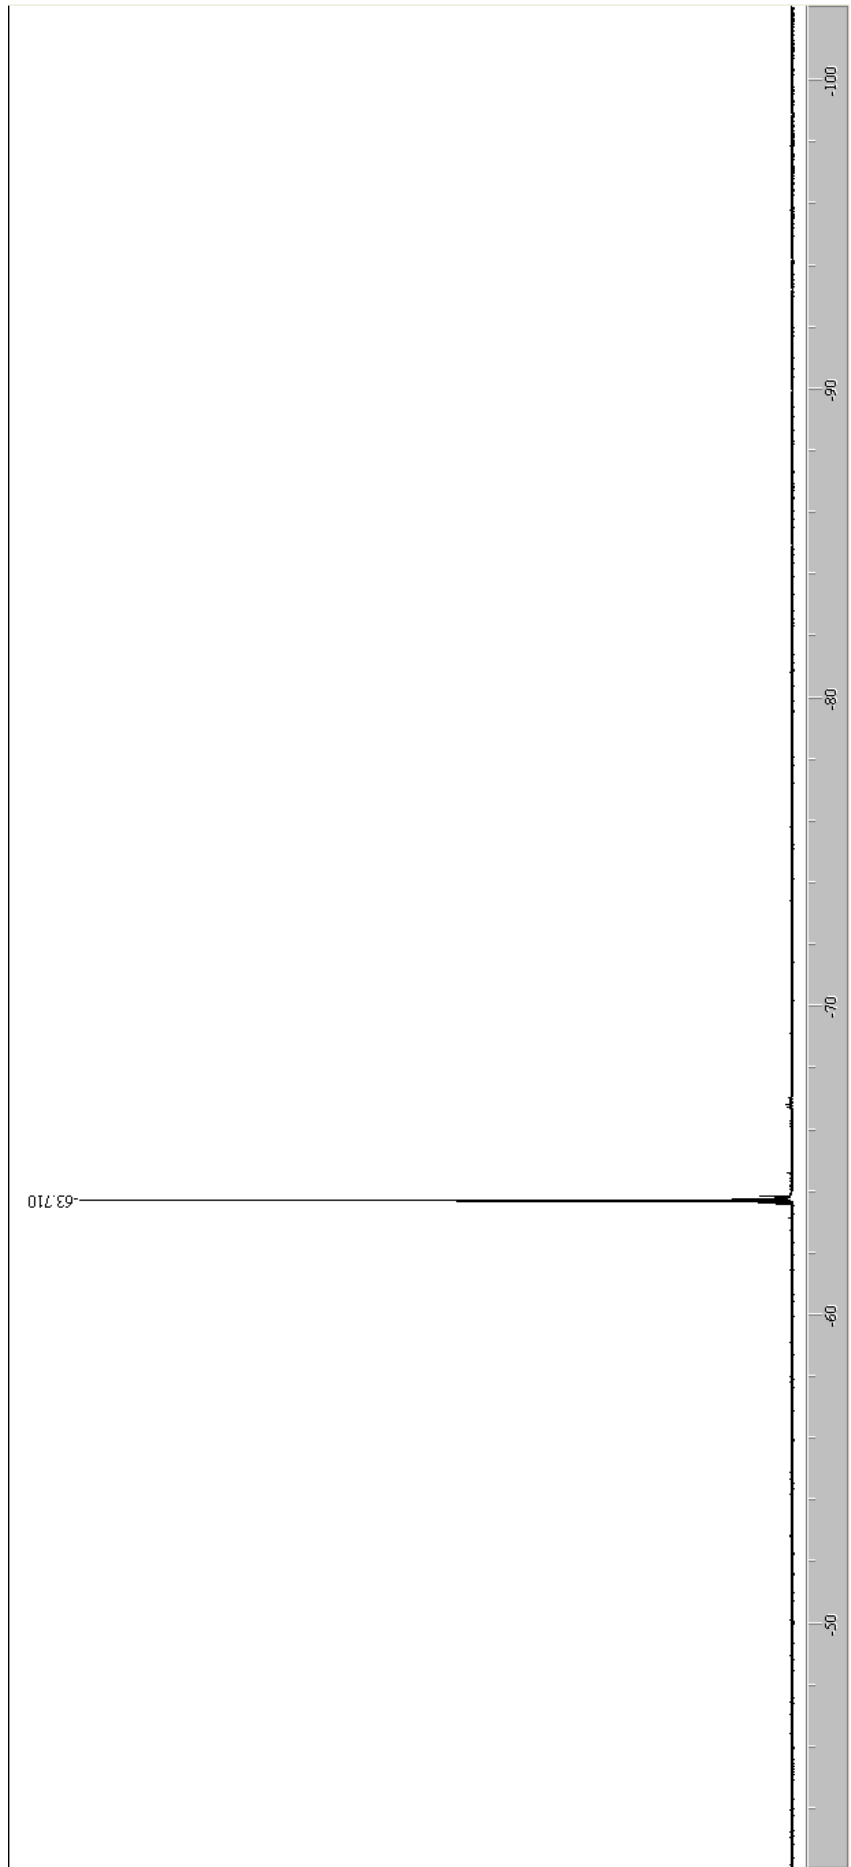

Methyl 3-(trifluoromethyl)-4,5-dihydroisoxazole-5-carboxylate (**1i**)

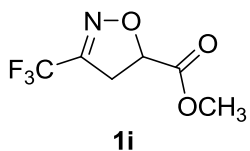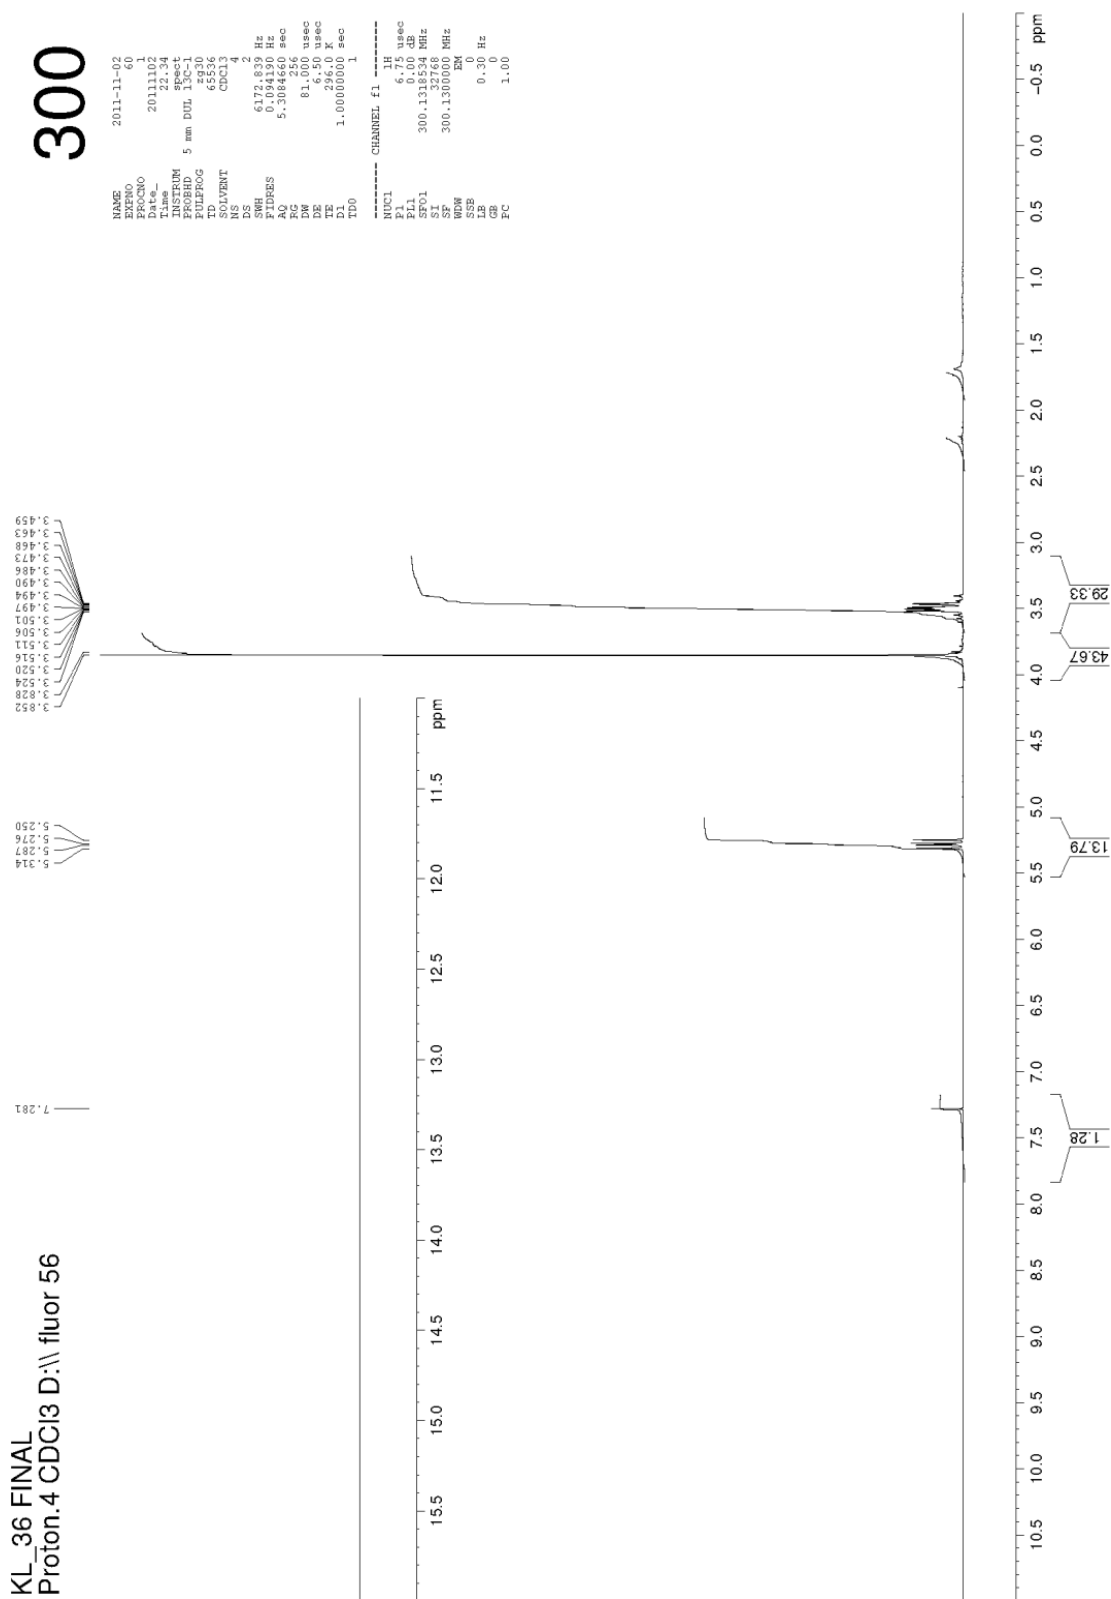

KL\_36 FINAL  
 CARBONE CDCI3 D:\\ fluor 56

```

NAME                2011-11-02
EXNO                 61
PROCNO              1
Date_               20111102
Time                22.142
INSTRUM             spect
PROBHD              5 mm DDL 13C-1
PULPROG             zgpg30
TD                  65536
SOLVENT             CDCl3
NS                   4
DS                   4
SWH                 17985.611 Hz
FIDRES              0.274439 Hz
AQ                  1.8219508 sec
RG                  65536
DM                   27.800 usec
DE                   6.50 usec
TE                   296.8 K
D1                   2.0000000 sec
D11                  0.0300000 sec
TD0                  1

===== CHANNEL f1 =====
NUCL                13C
F1                   6.00 usec
P1                   0.00 dB
SFO1                 75.4760505 MHz

===== CHANNEL f2 =====
CPDPRG2             waltz16
NUC2                 1H
F2                   100.00 usec
P2                   0.00 dB
PL12                 23.41 dB
PL13                 20.50 dB
SFO2                 300.132005 MHz
SF                   75.4677490 MHz
WDW                   EM
SSB                   0
LB                   3.00 Hz
GB                   0
FC                   1.40
  
```

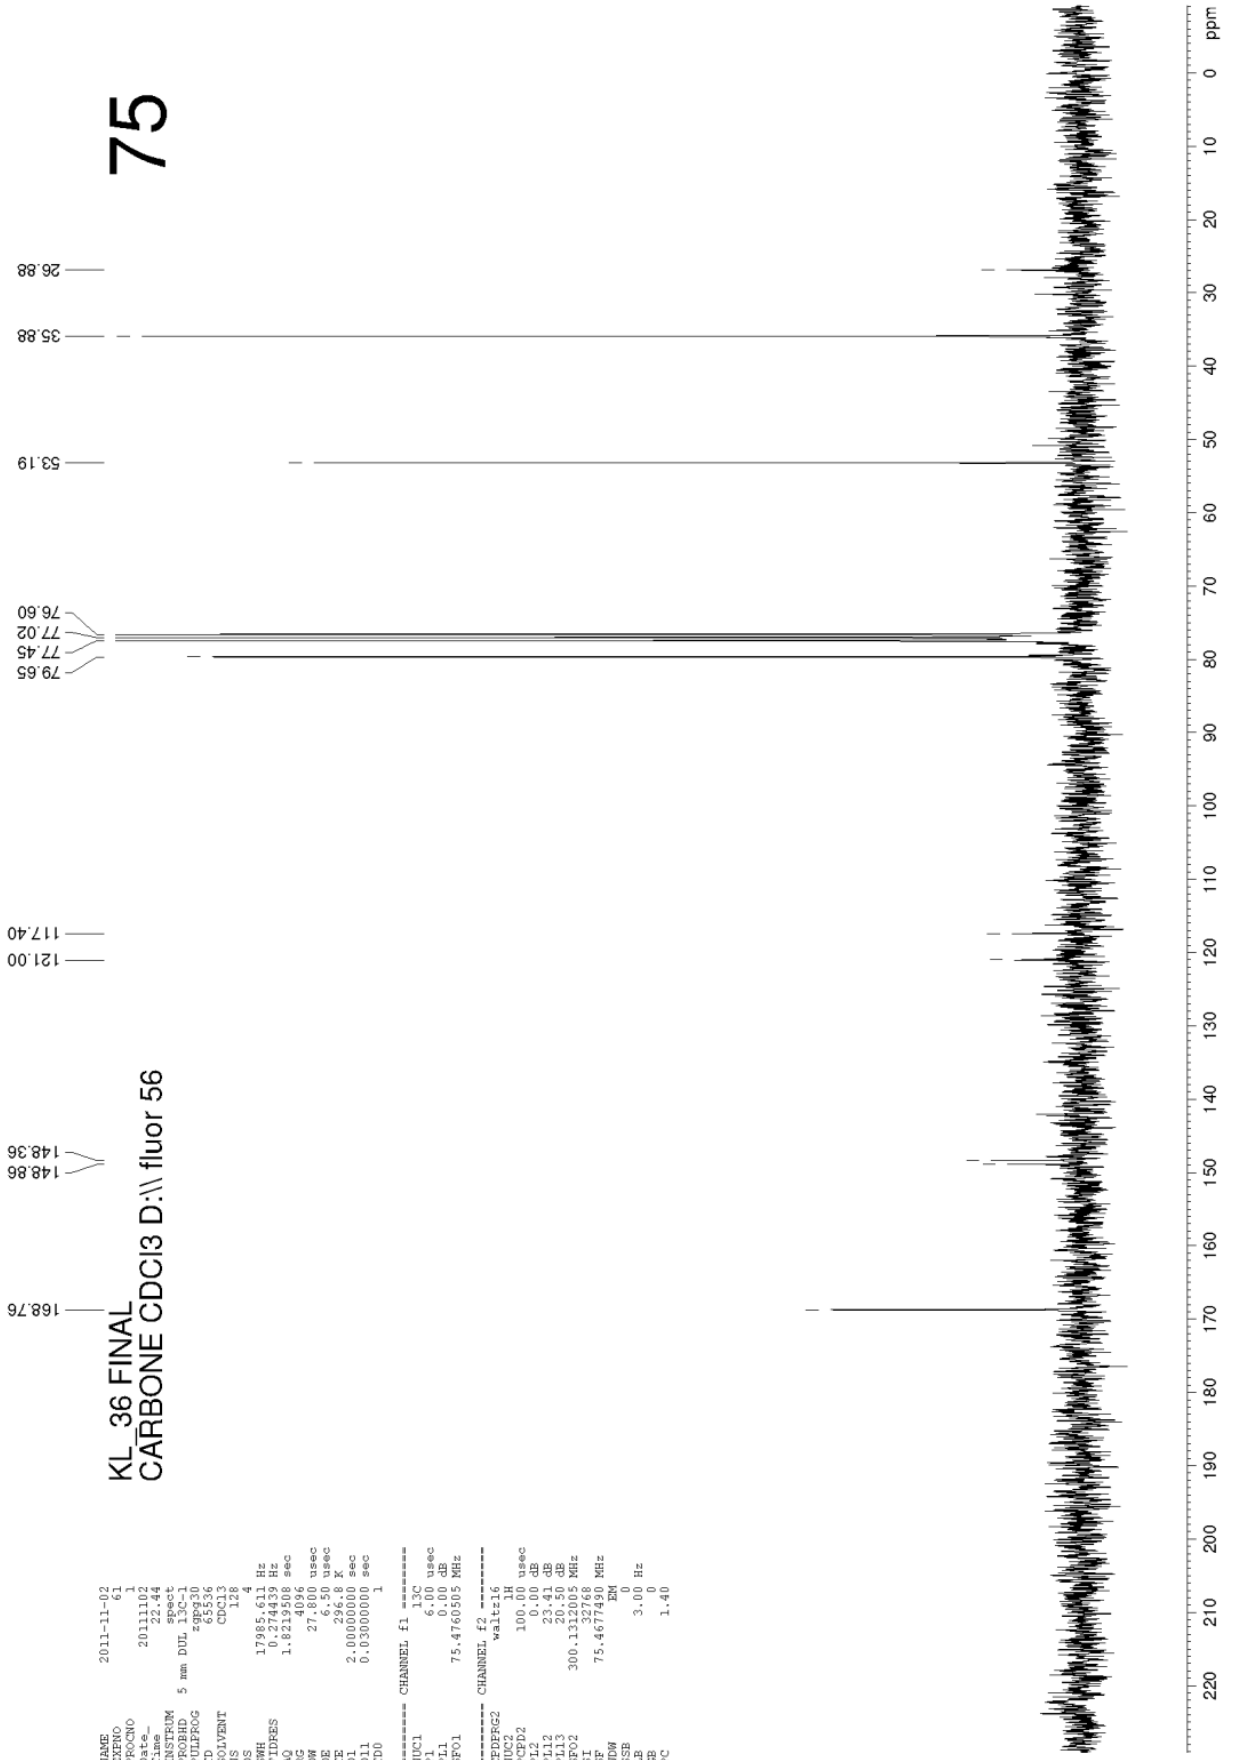

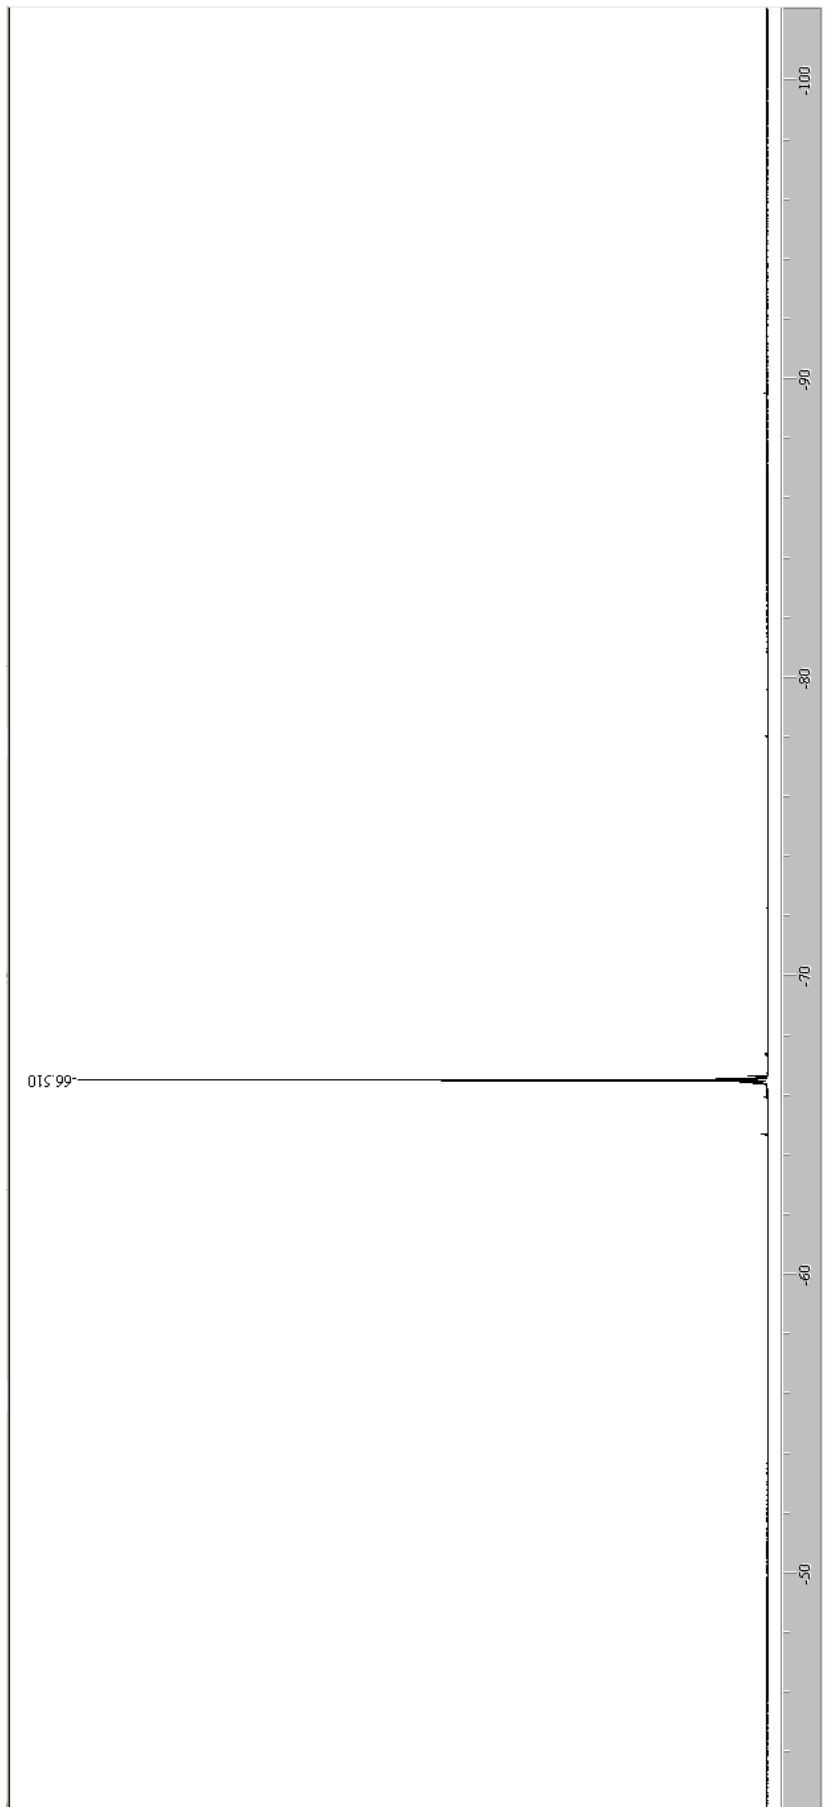

5-(Bromomethyl)-3-(trifluoromethyl)-4,5-dihydroisoxazole (**1j**)

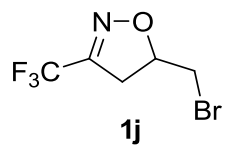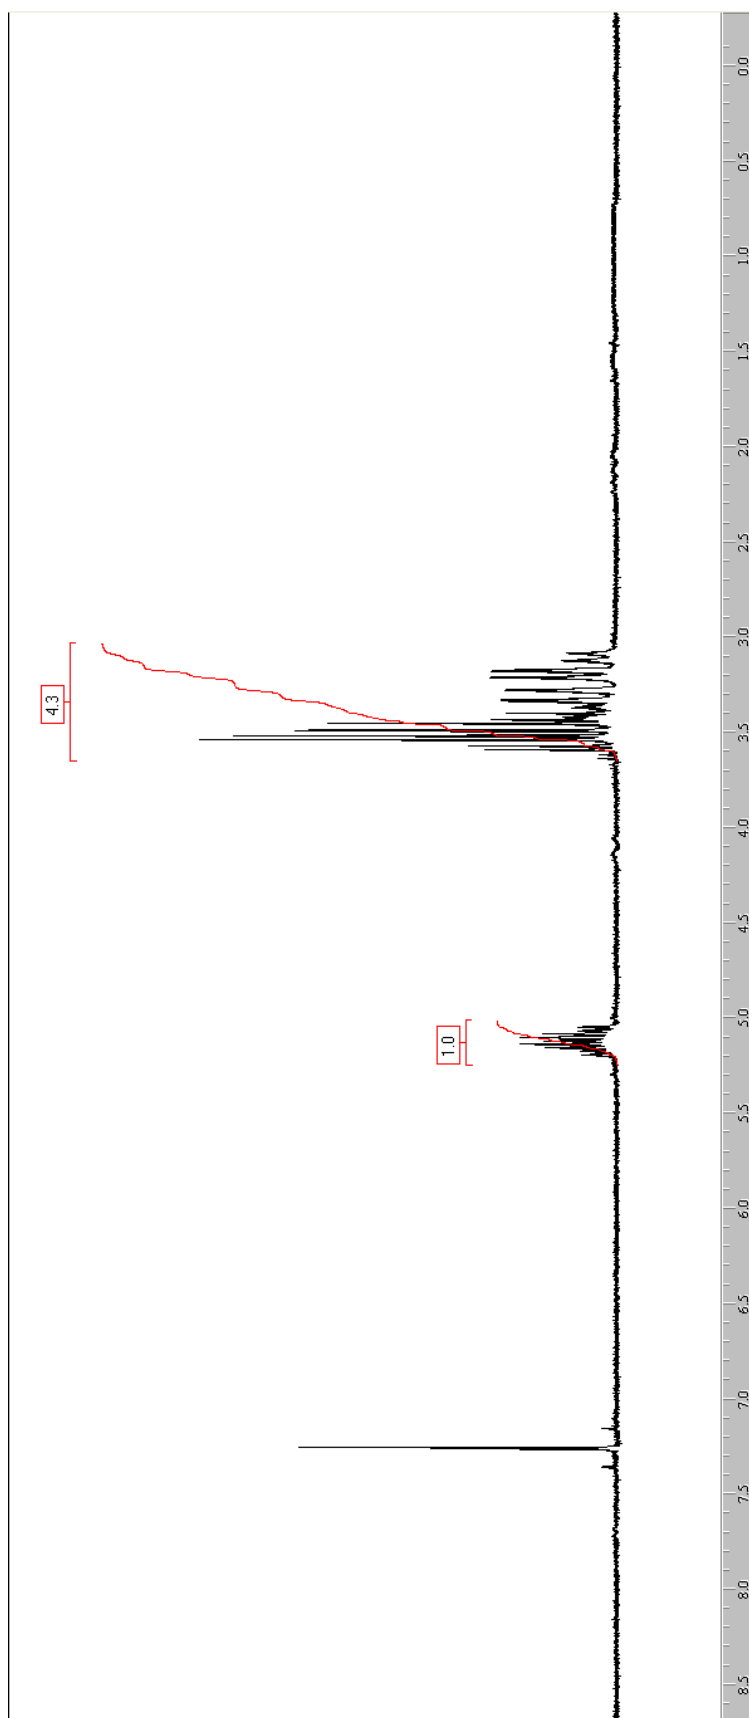

MDS 283-3 P  
 JMOD CDC13 v biocis 21

Current Data Parameters  
 NAME 11.10.passeur  
 EXPNO 610  
 PROCNO 1

F2 - Acquisition Parameters  
 Date\_ 20051112  
 Time 19.32  
 INSTRUM spect  
 PROBHD 5 mm QNP 1H  
 PULPROG jmod  
 TO 65536  
 SOLVENT CDC13  
 NS 1600  
 DS 4  
 SWH 12820.513 Hz  
 FIDRES 0.195625 Hz  
 AQ 2.559540 sec  
 RG 45500  
 DW 39.000 usec  
 DE 55.71 usec  
 TE 300.0 K  
 O20 0.00689000 sec  
 OL5 22.00 dB  
 D1 6.00000000 sec  
 CDPORG waitz16  
 P31 100.00 usec  
 D13 0.00000400 sec  
 P1 9.00 usec  
 P2 18.00 usec  
 SFO1 50.3262440 MHz  
 NUCLEUS 13C

F2 - Processing parameters  
 S1 32768  
 SF 50.3227365 MHz  
 MDM EM  
 SSB 0  
 LB 3.00 Hz  
 GB 0  
 PC 1.40

1D NMR plot parameters  
 CX 30.00 cm  
 F1P 215.000 ppm  
 F1 10819.39 Hz  
 F2P -5.000 ppm  
 F2 -251.61 Hz  
 PRACH 7.33333 ppm/cm  
 HZCN 369.03339 Hz/cm

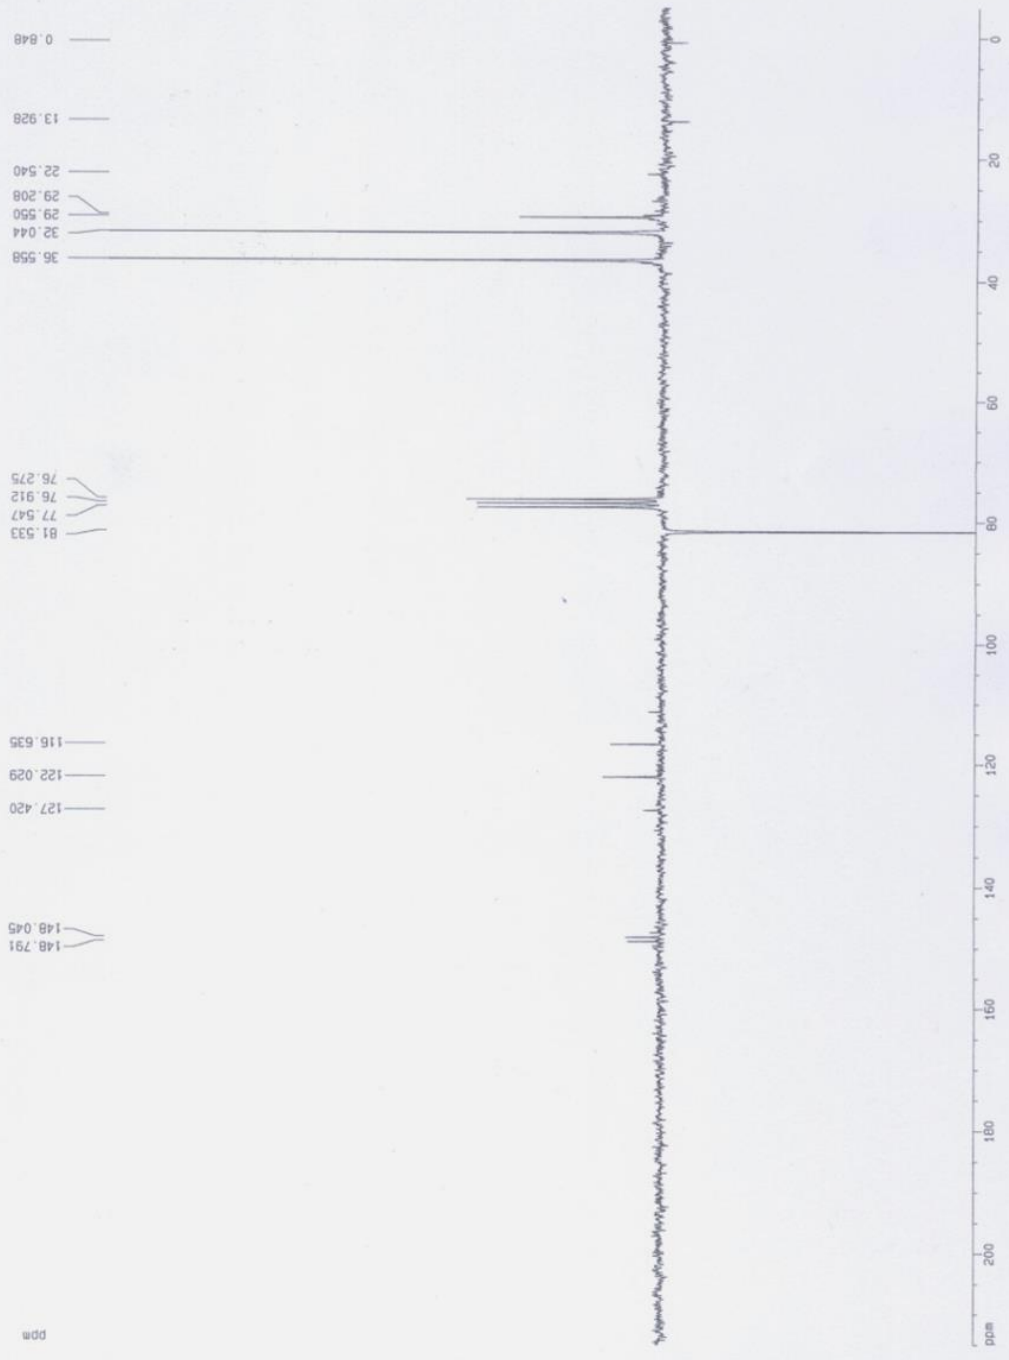

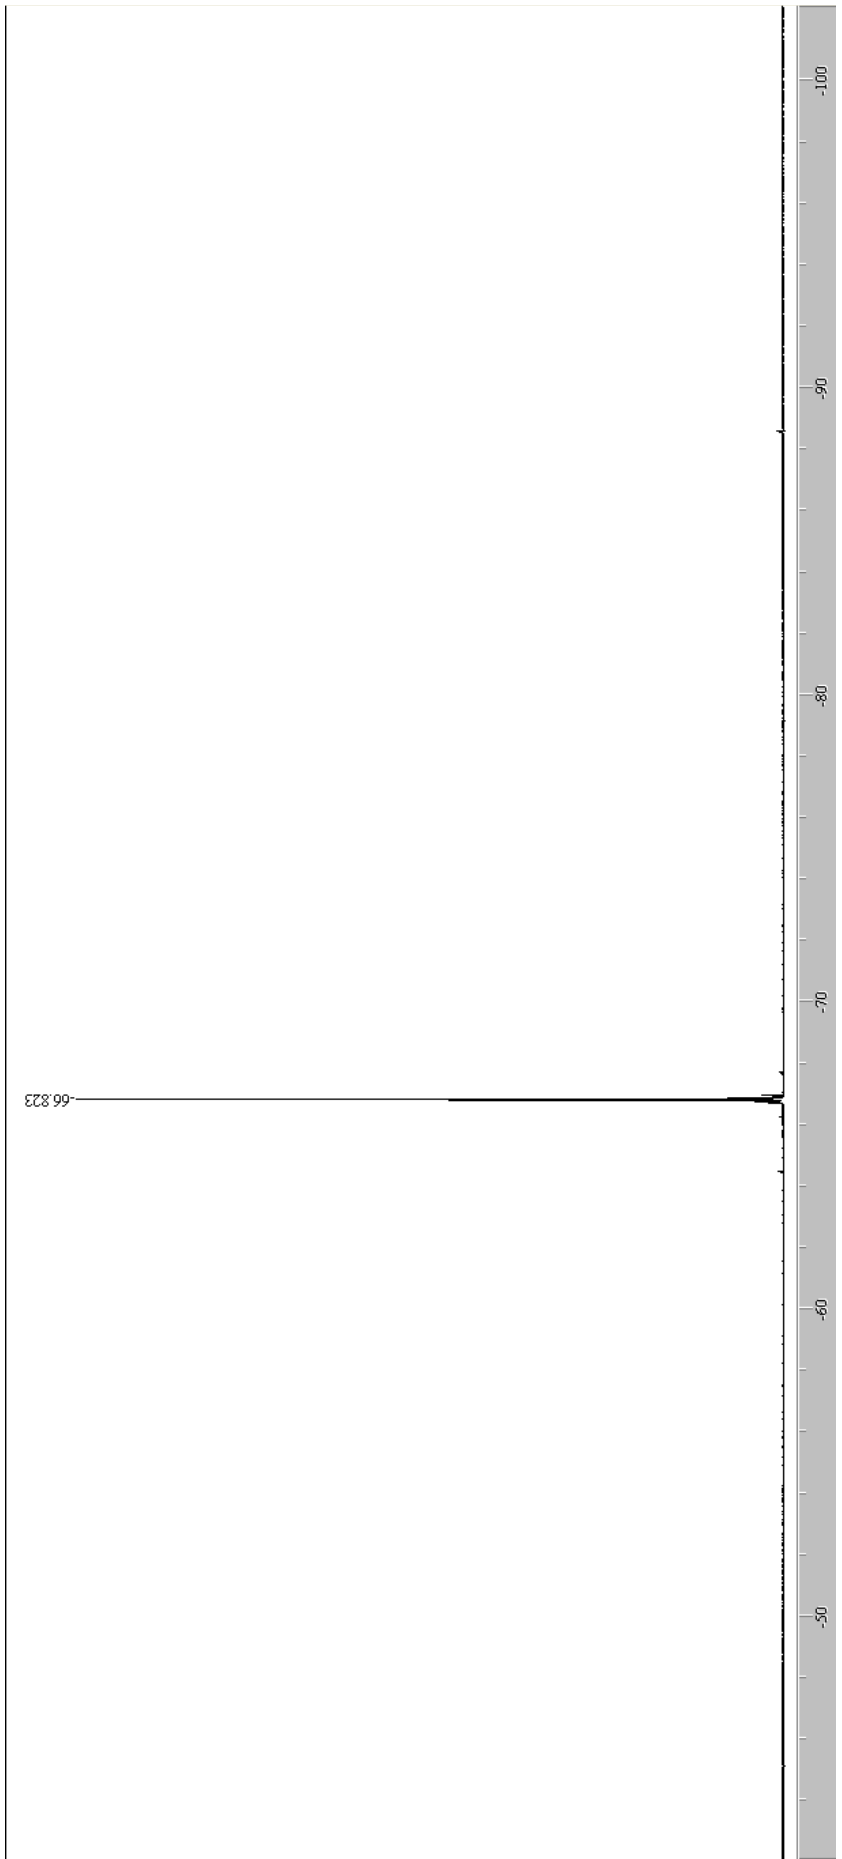

5-Phenyl-3-(trifluoromethyl)isoxazole (**11**)

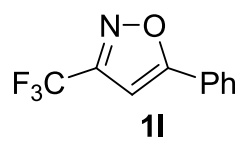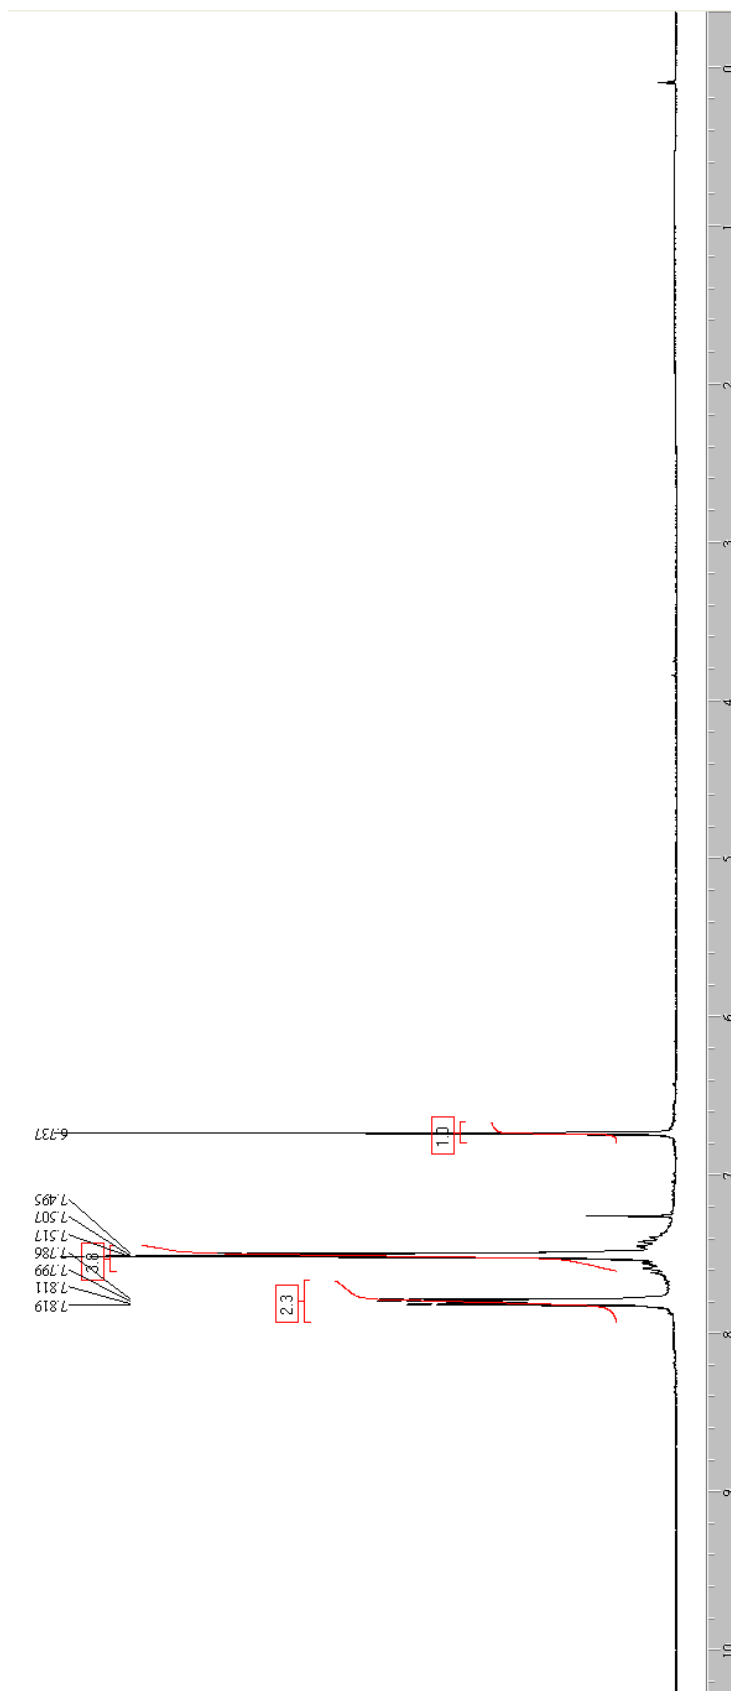



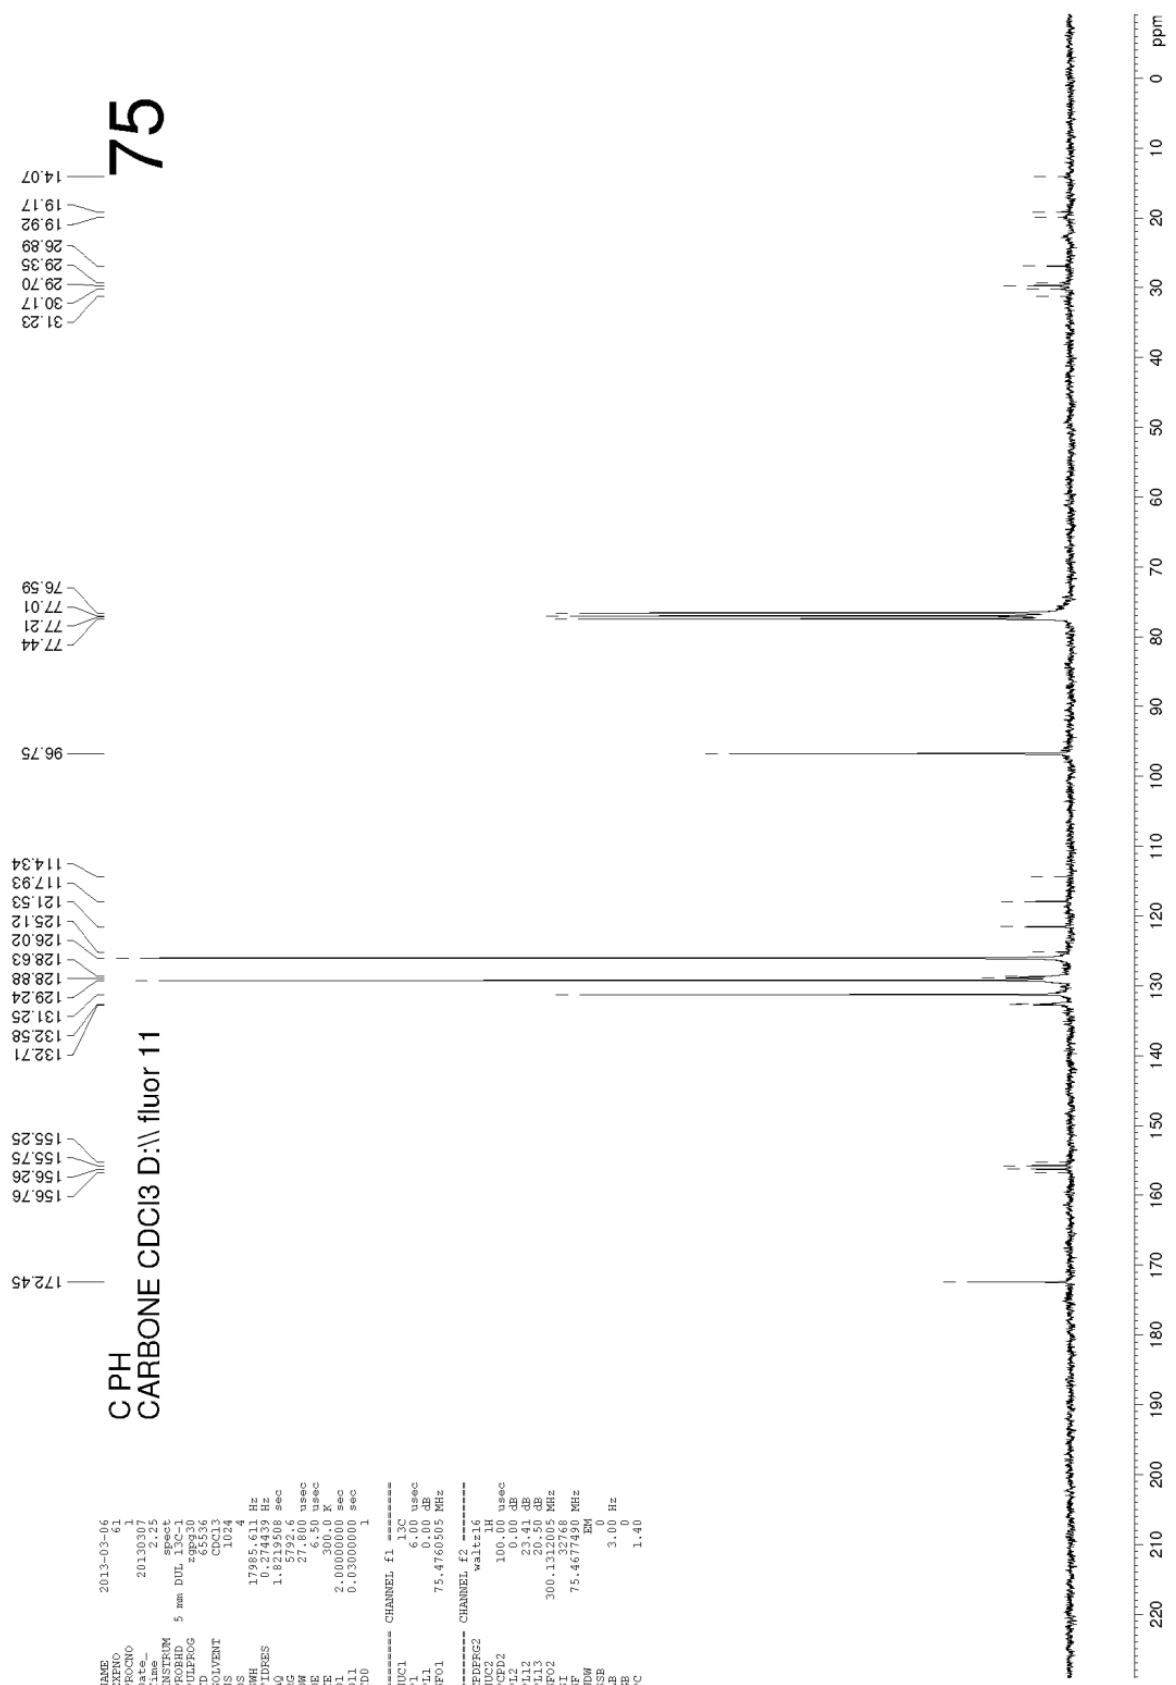

```

NAME          2013-03-06
EXPNO         61
PROCNO        1
Date_         20130307
Time          2.25
INSTRUM       spect
PROBHD        5 mm DUL 13C-1
PULPROG       zgpg30
TD            65536
SOLVENT       CDCl3
NS            1024
DS            4
SWH           177985.611 Hz
FIDRES       0.2744339 Hz
AQ           1.8219508 sec
RG           279.66
DS           2.0000000
DE           6.50 usec
TE           300.0 K
D1           2.0000000 sec
D11          0.0300000 sec
TD0          1

===== CHANNEL f1 =====
NUC1          13C
PCPD2        6130 usec
FL1           0.00 dB
SFO1         75.47760505 MHz

===== CHANNEL f2 =====
CPDPRG2      waltz16
NUC2          1H
PCPD2        100.00 usec
FL2           0.00 dB
SFO2         200.1312005 MHz
SFO1         75.4677450 MHz
SI           32768
SF          75.4677450 MHz
RG          20.50
SSB          0
LB           3.00 Hz
GB           0
PC           1.40
  
```

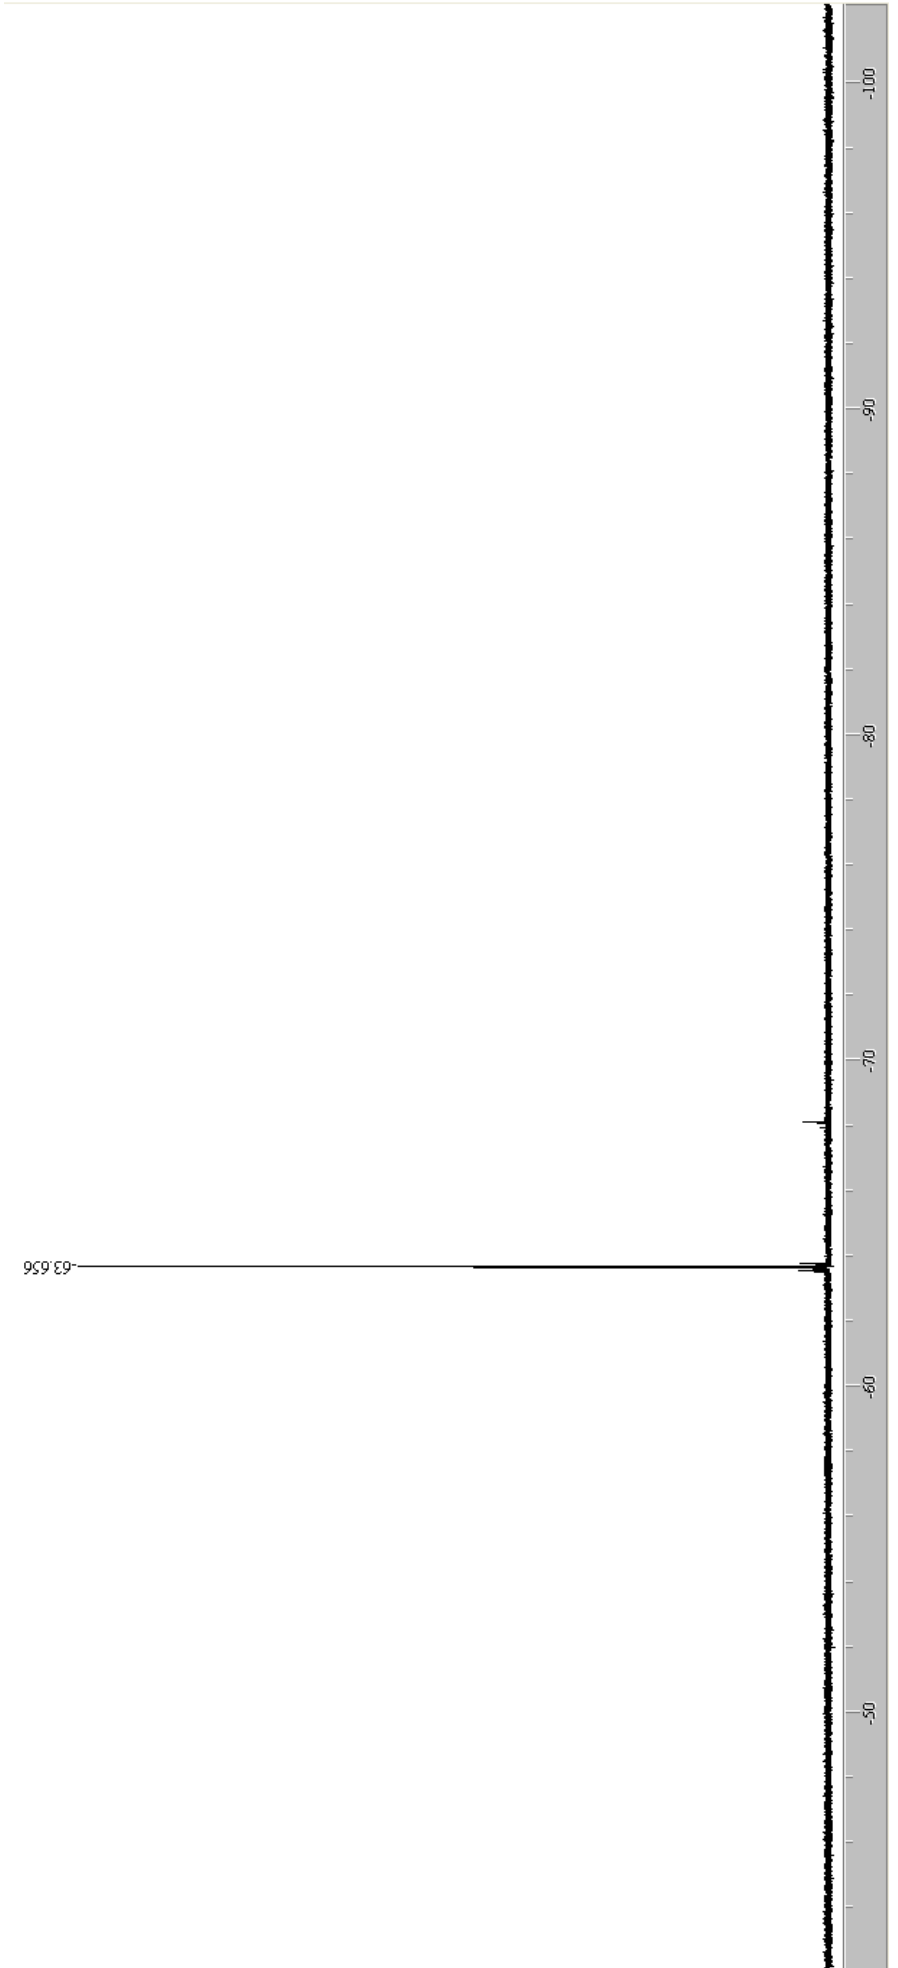

3-(Trifluoromethyl)-5-(trimethylsilyl)isoxazole (**1m**)

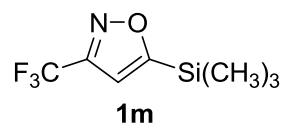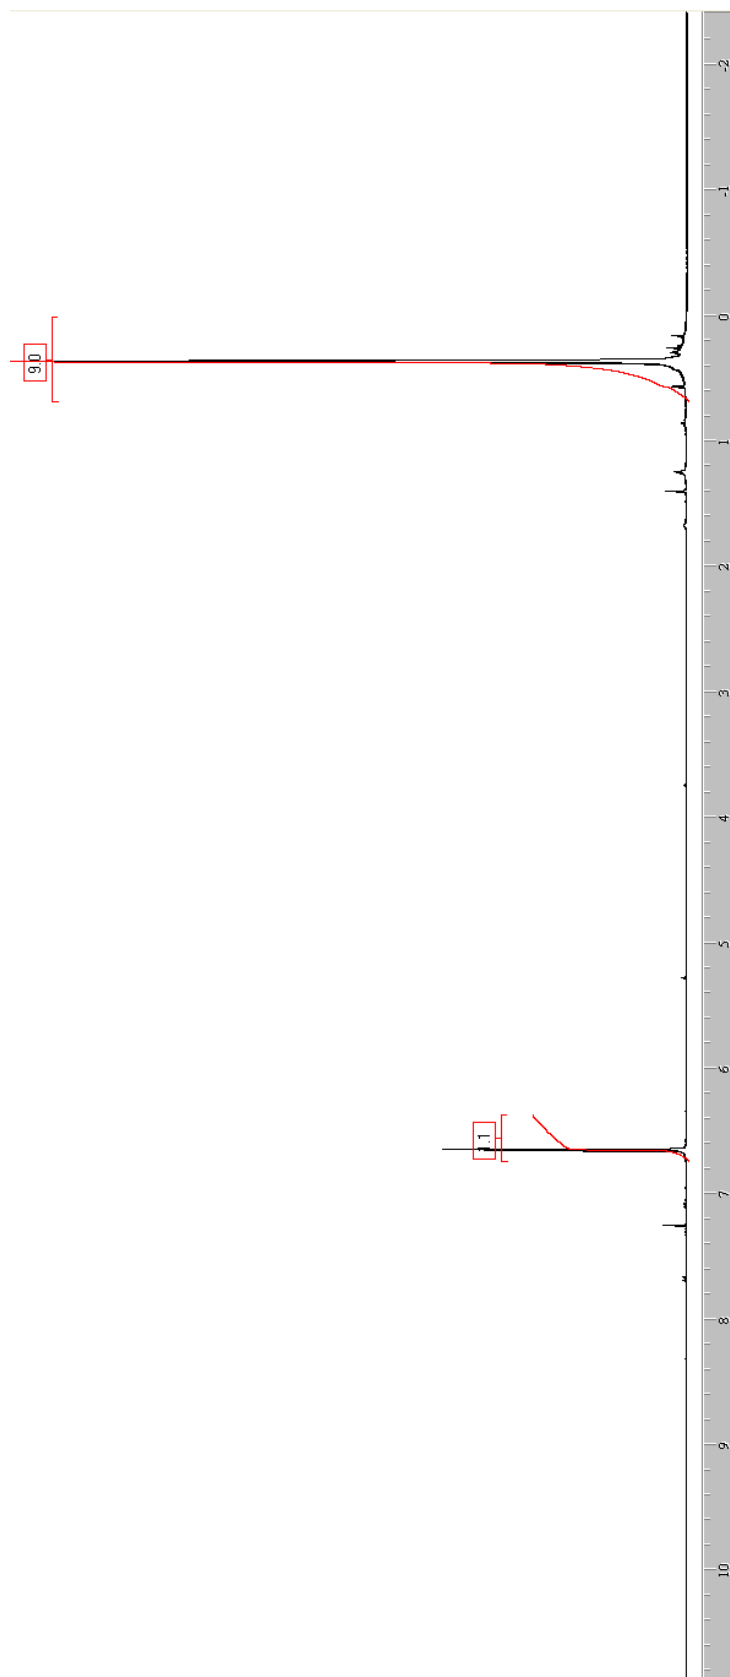

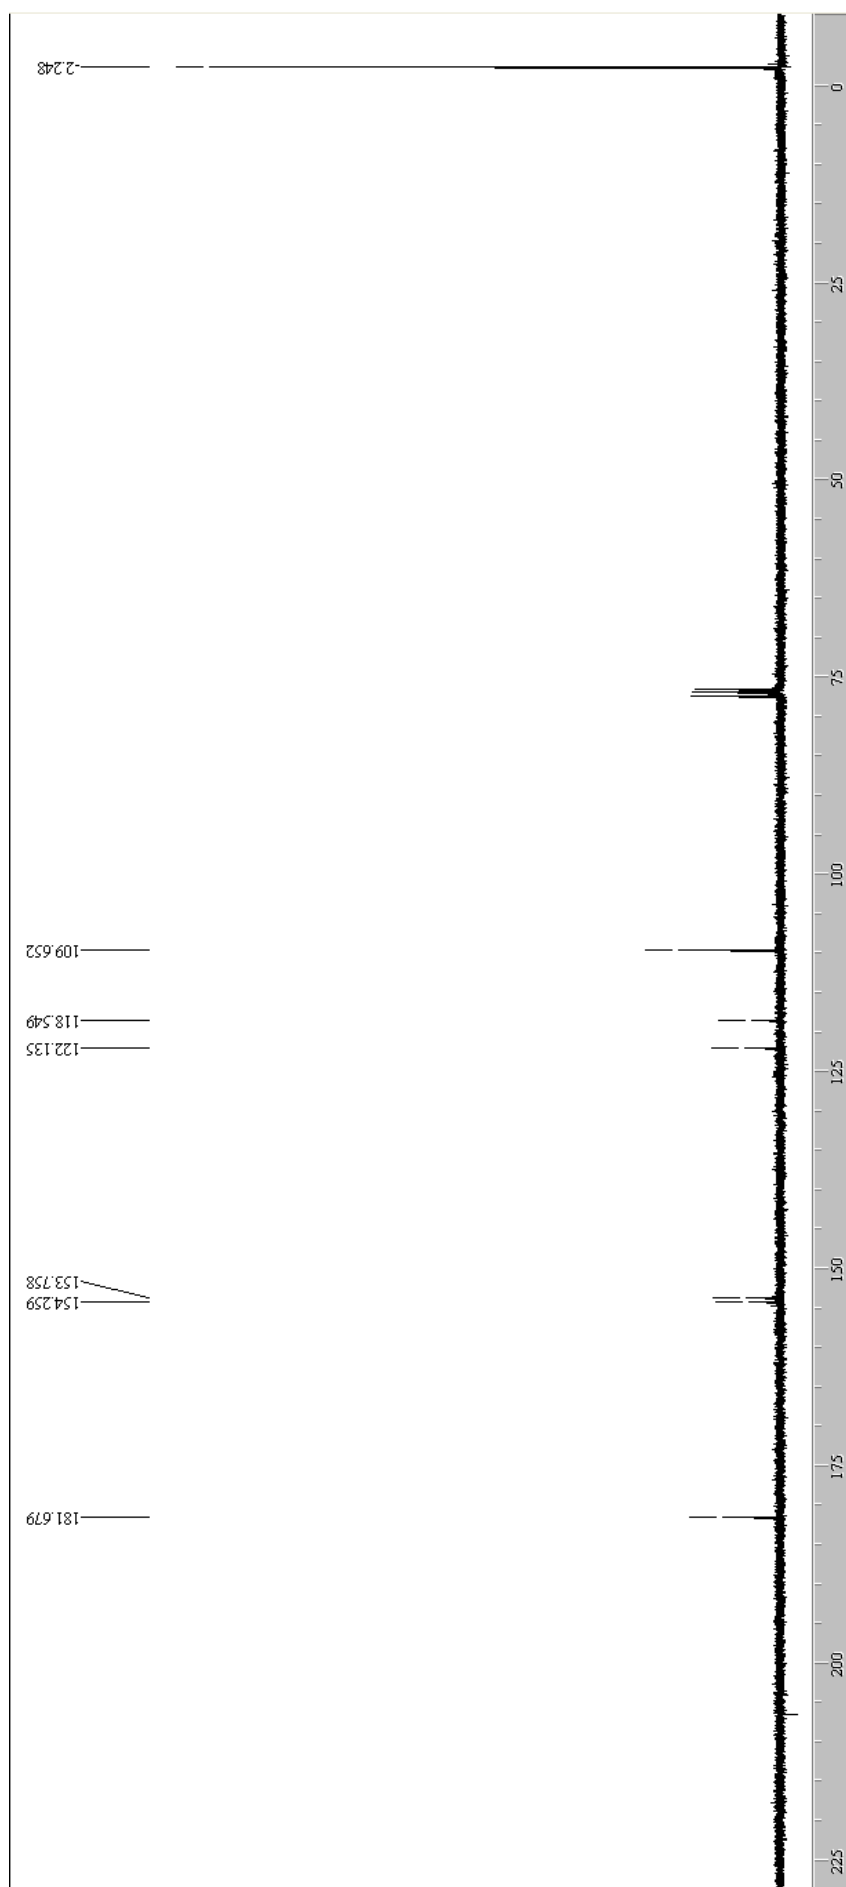

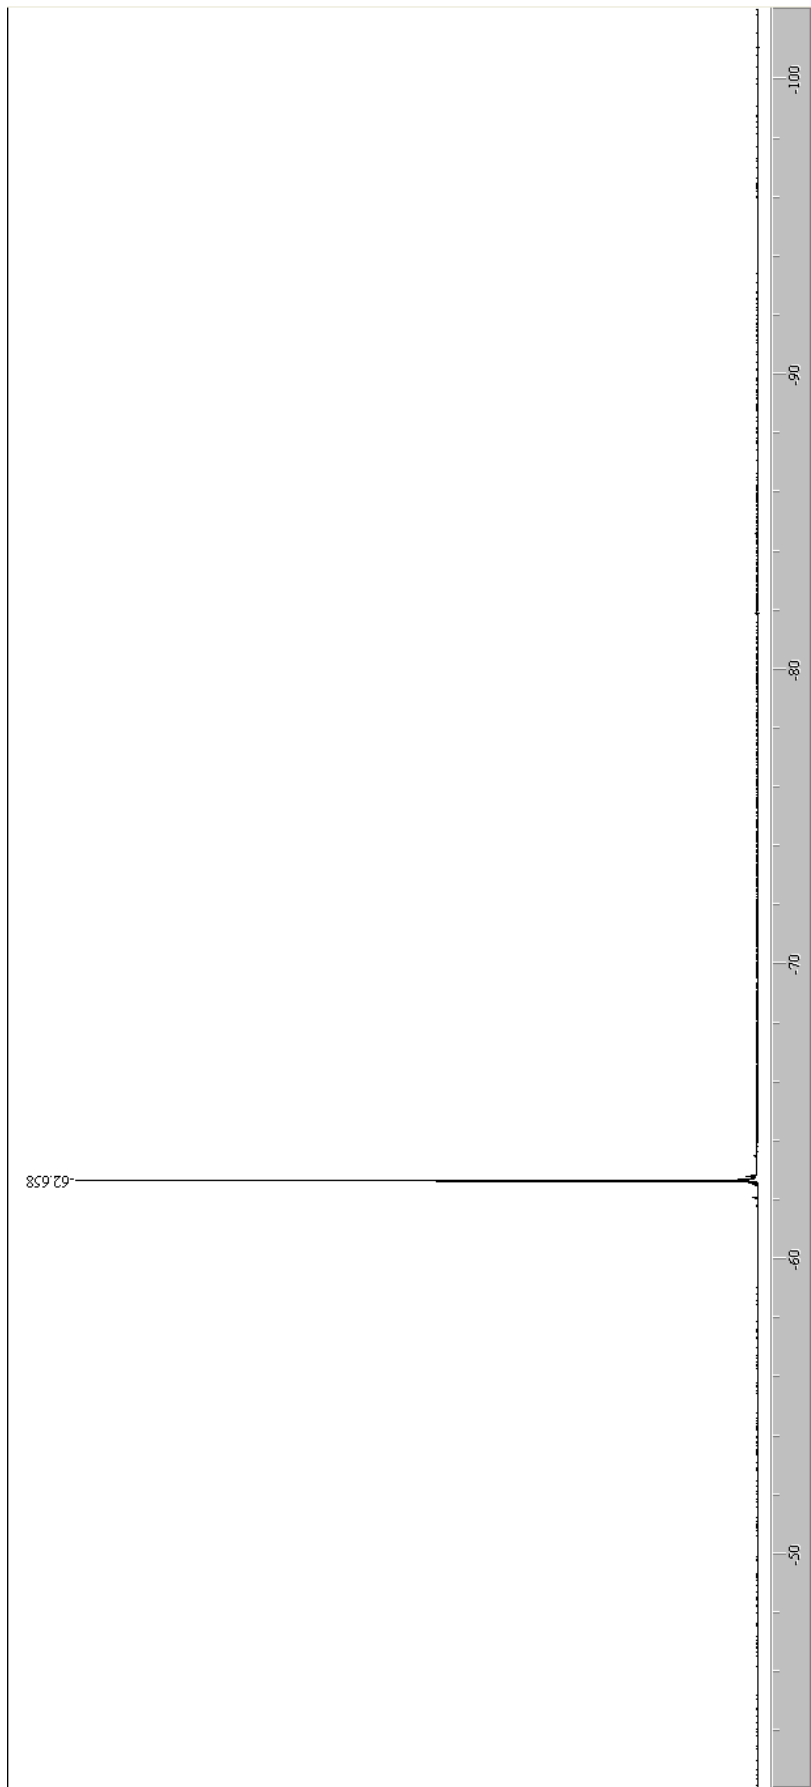

4-Amino-5,5,5-trifluoro-1-phenylpentan-2-ol (**7a**)

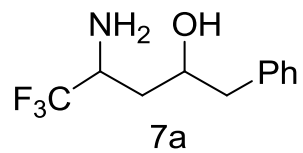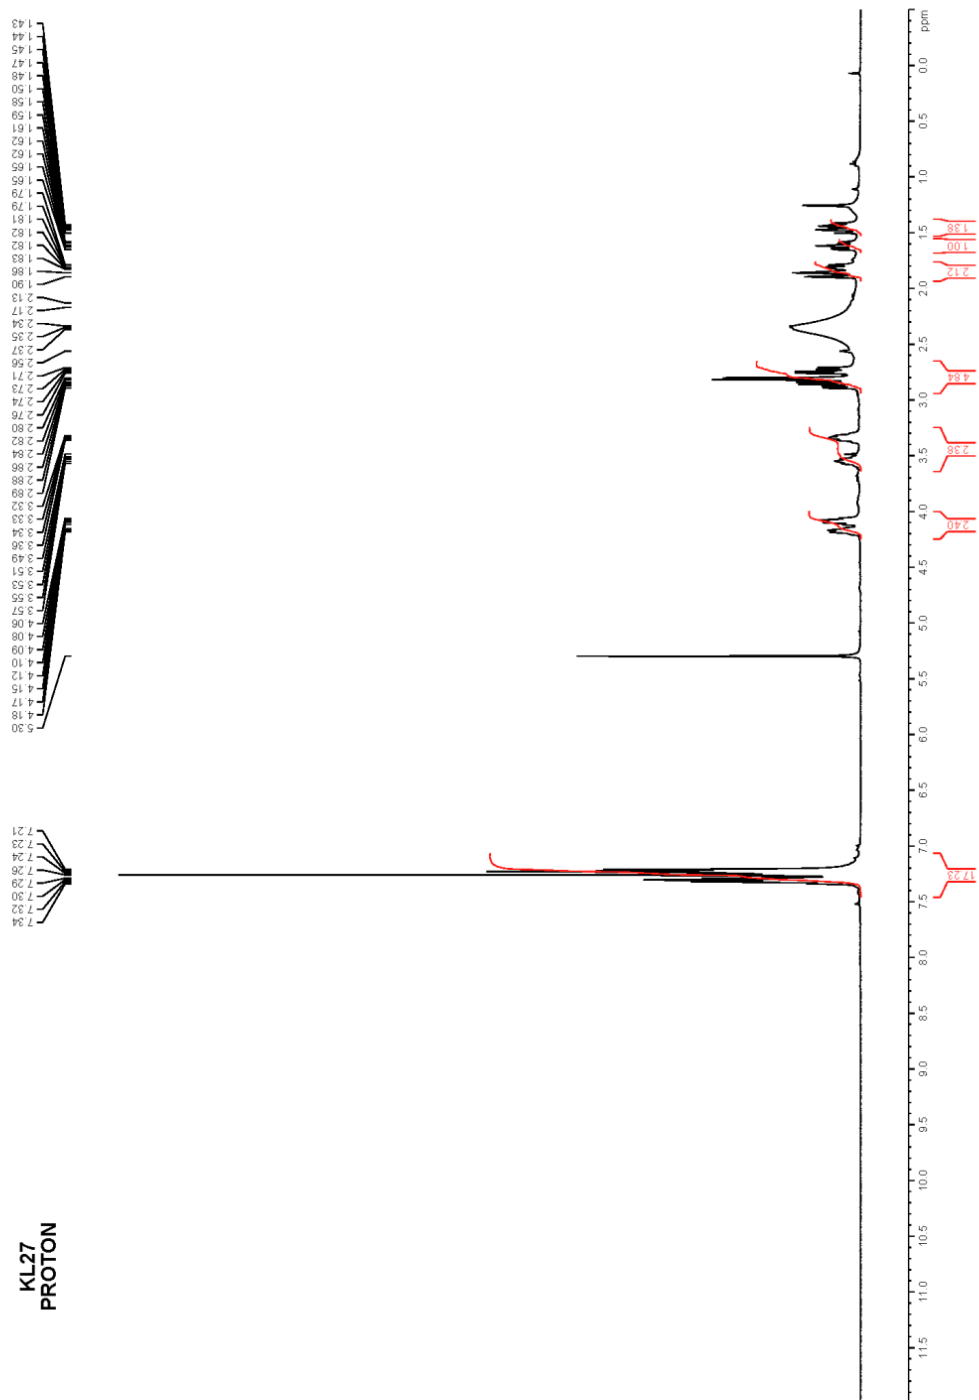

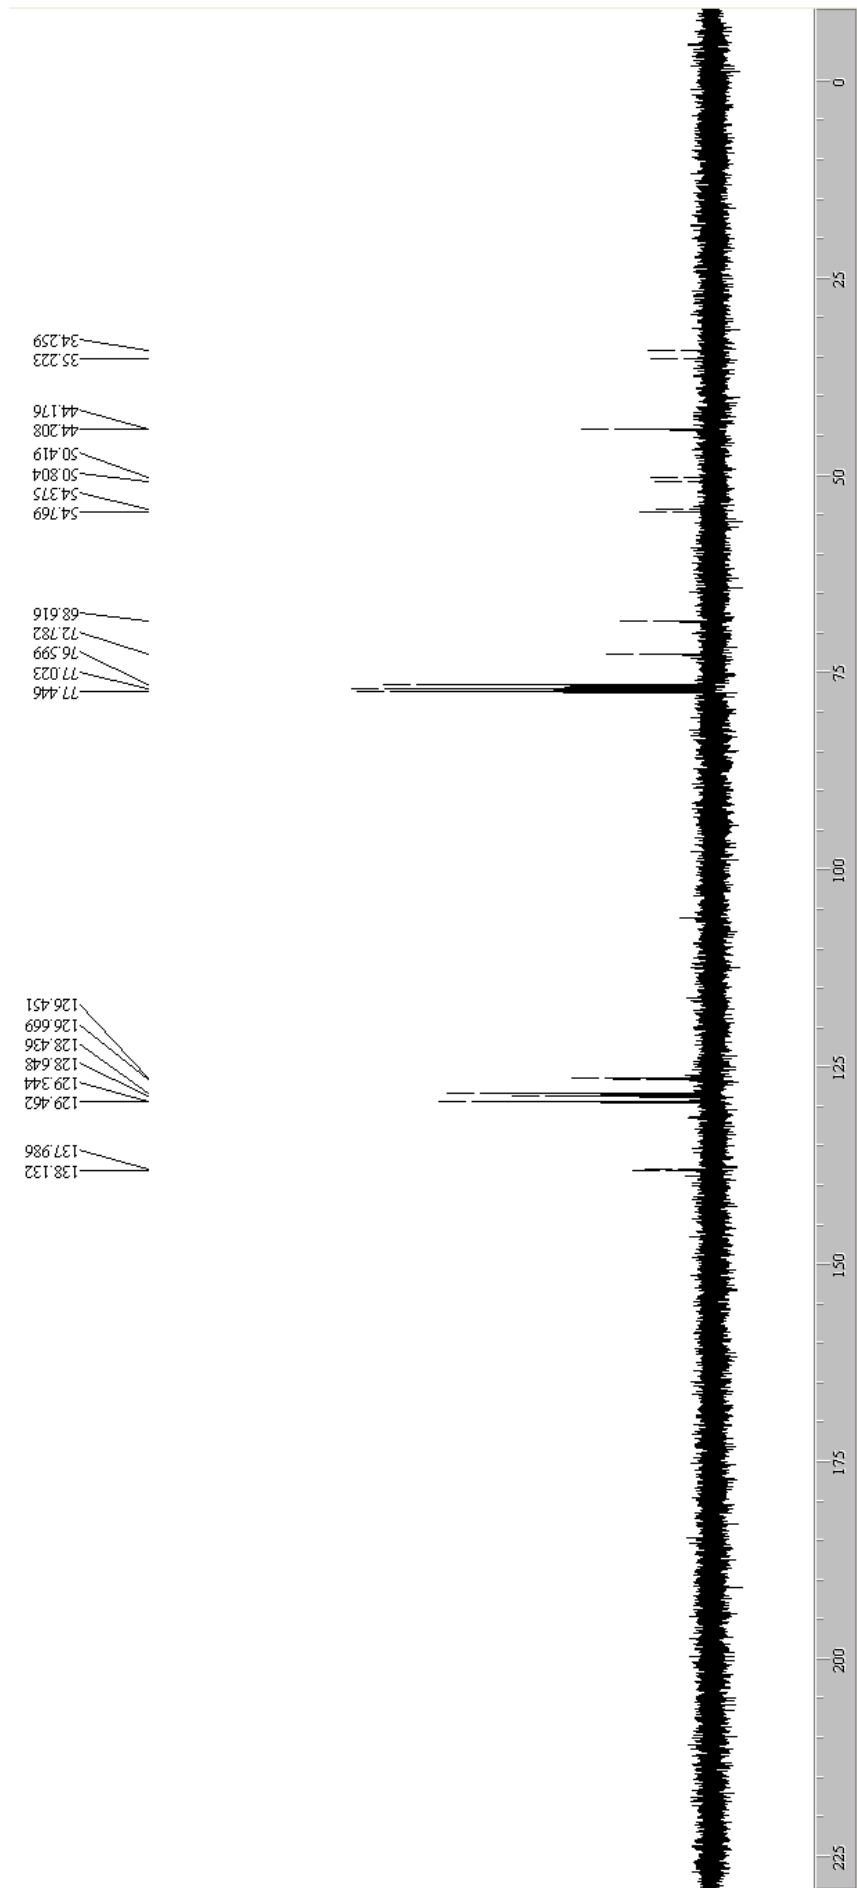

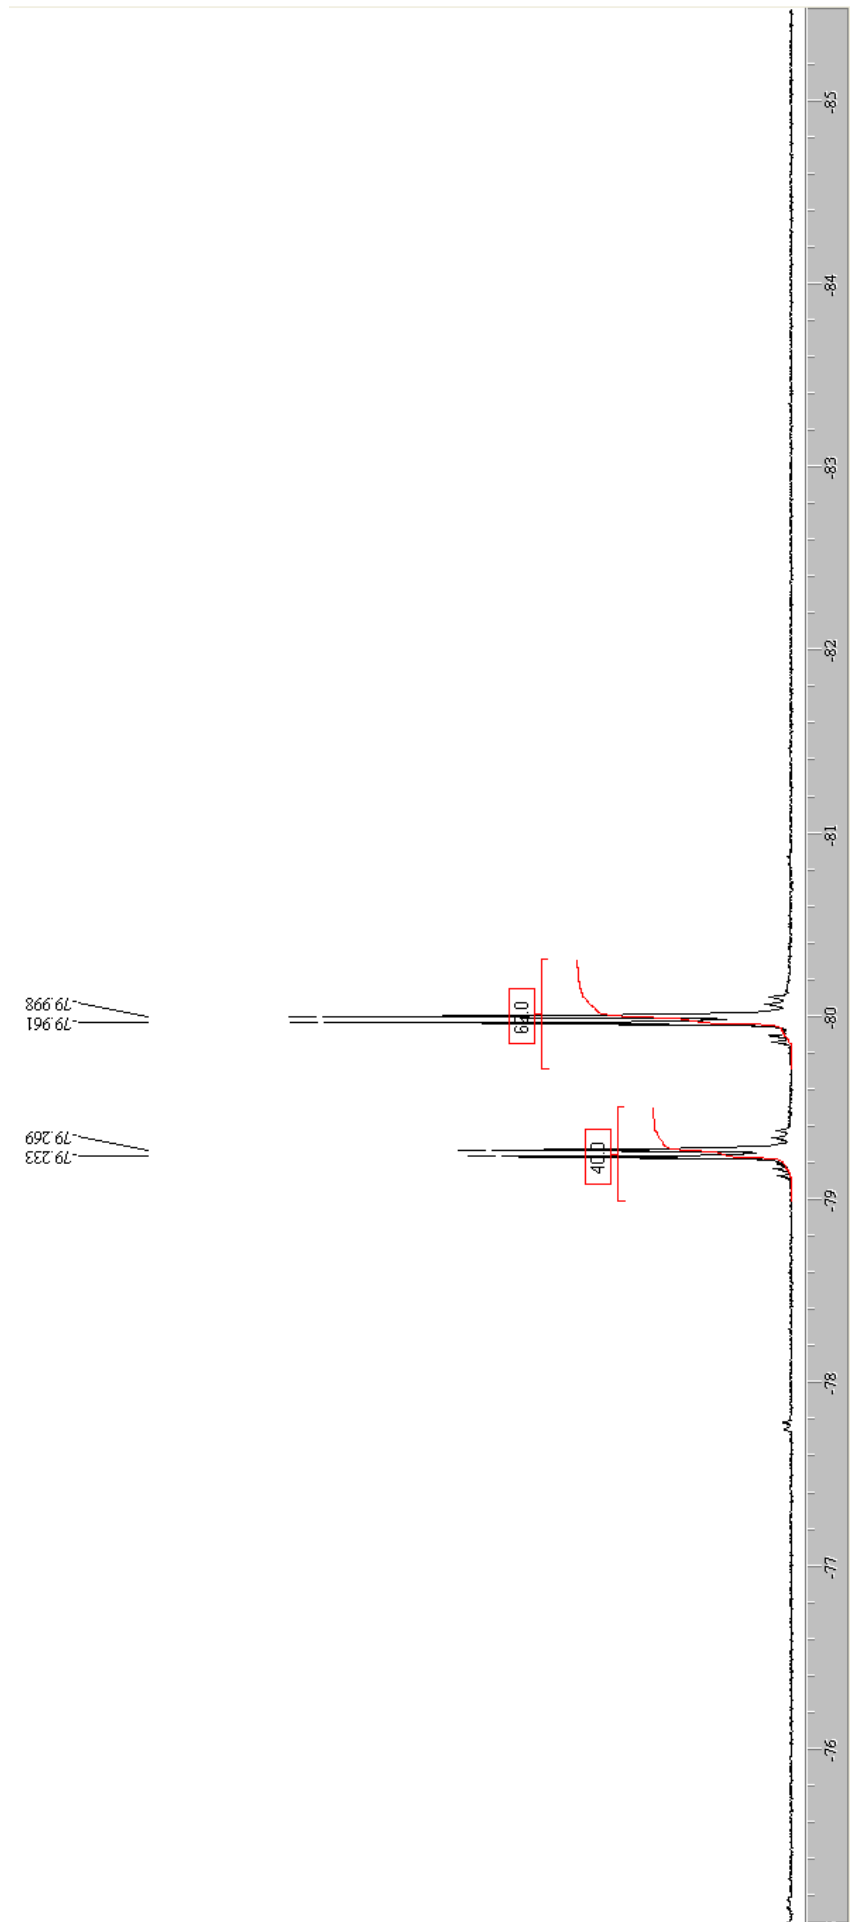



Benzyl 4-amino-5,5,5-trifluoro-2-hydroxypentylcarbamate (**7b**)

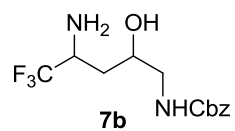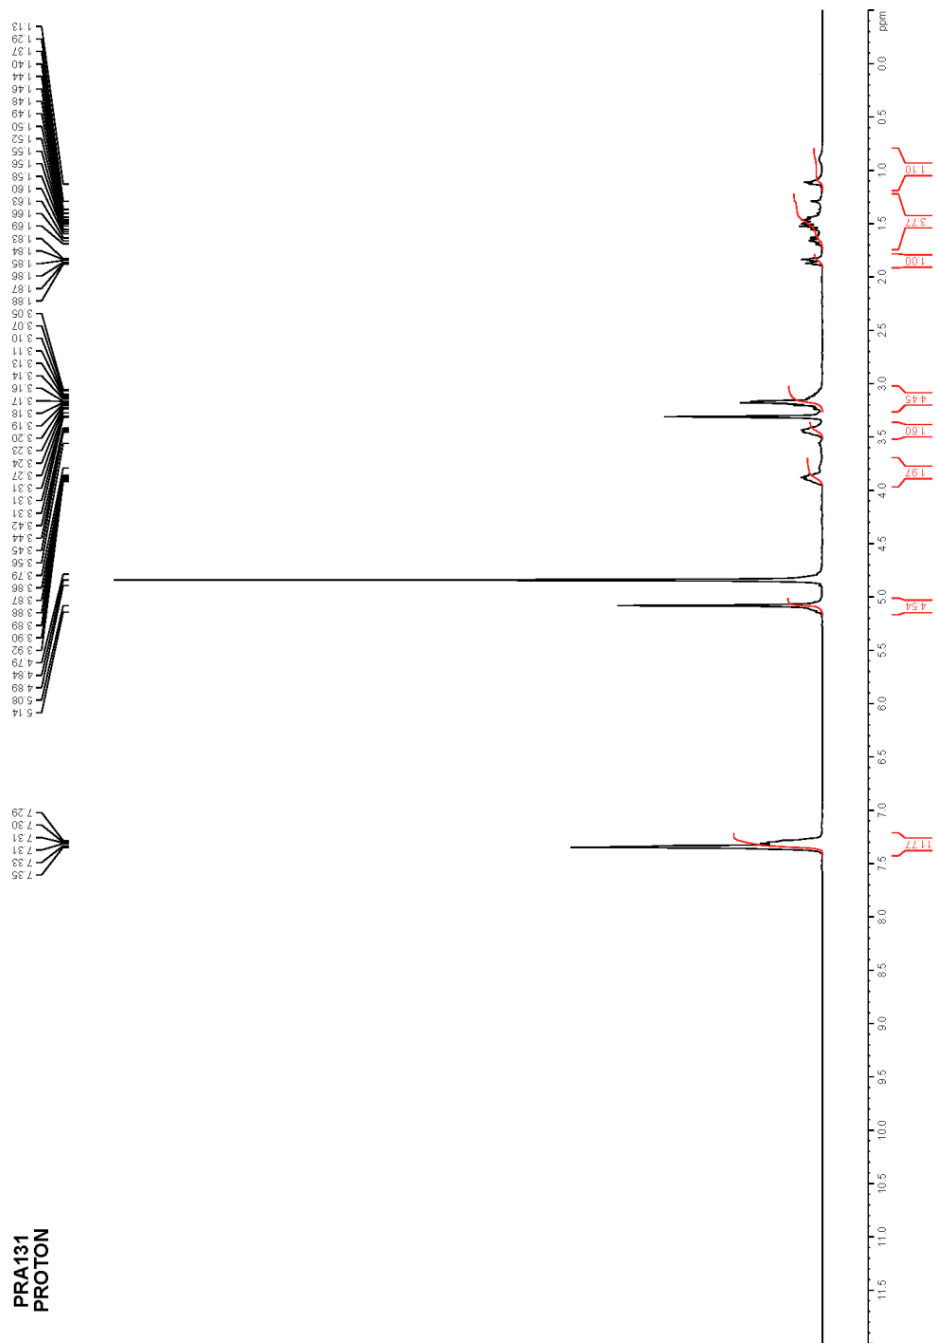

**PRA131**  
**Carbone par J Modulation**

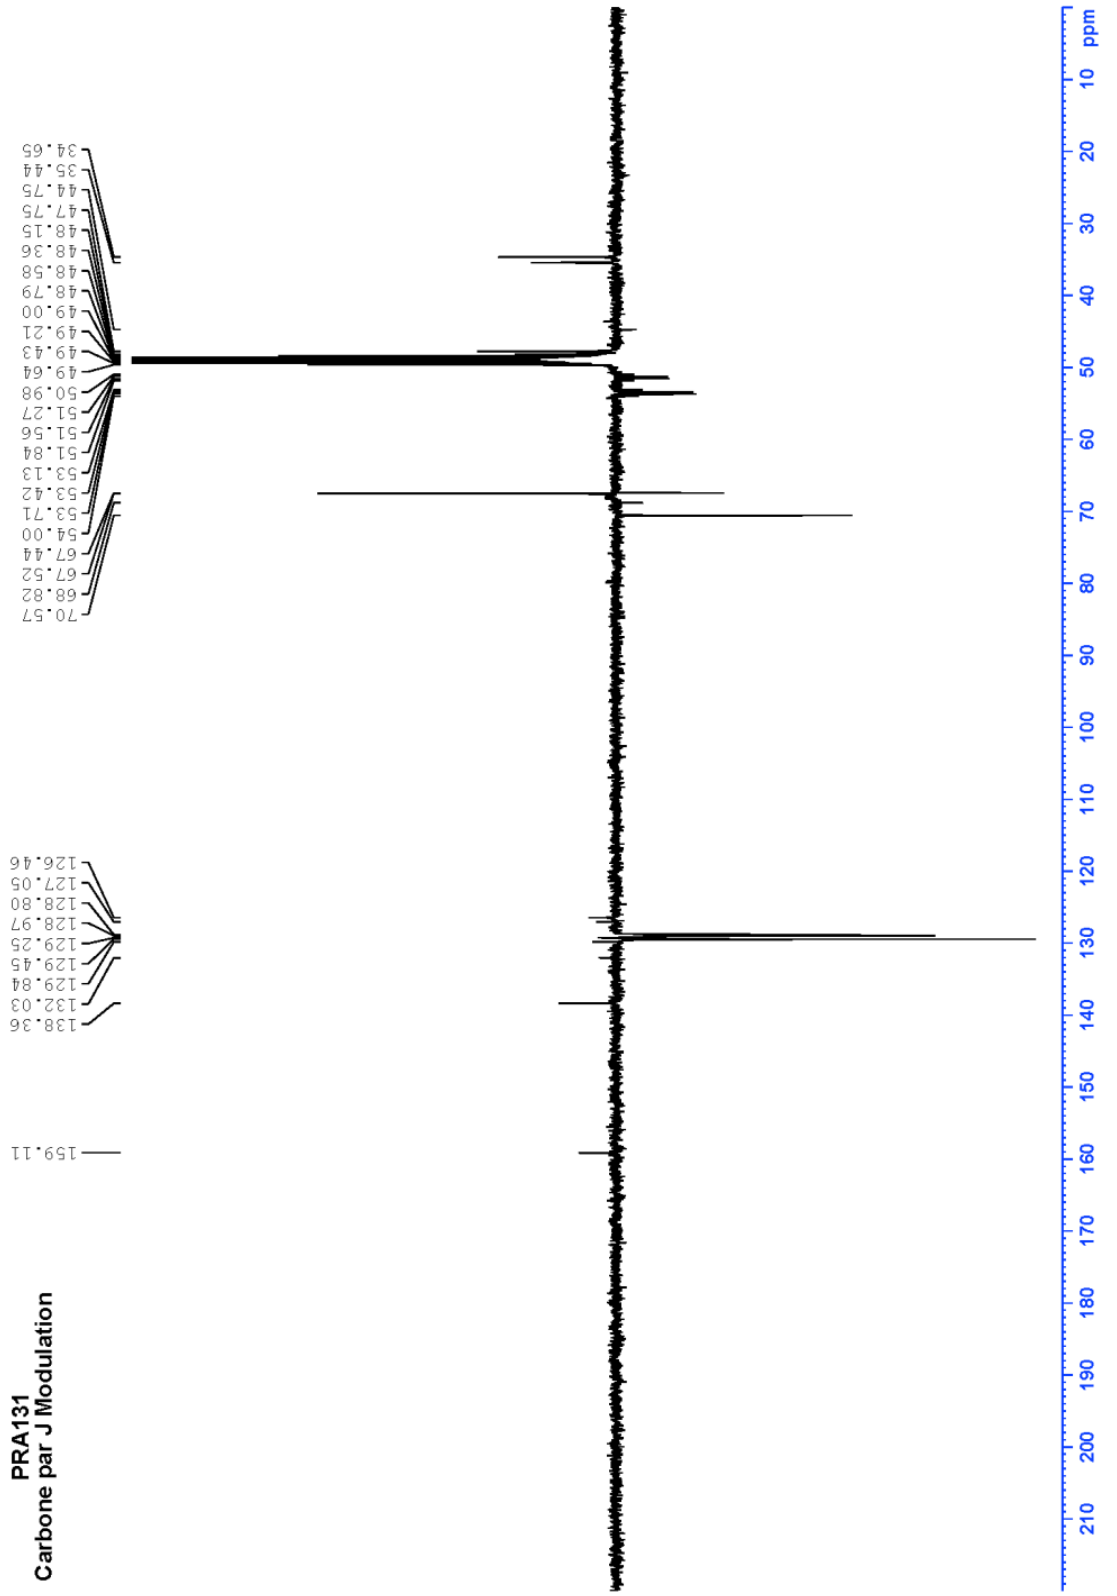

**PRA131**  
**Carbone par J Modulation**

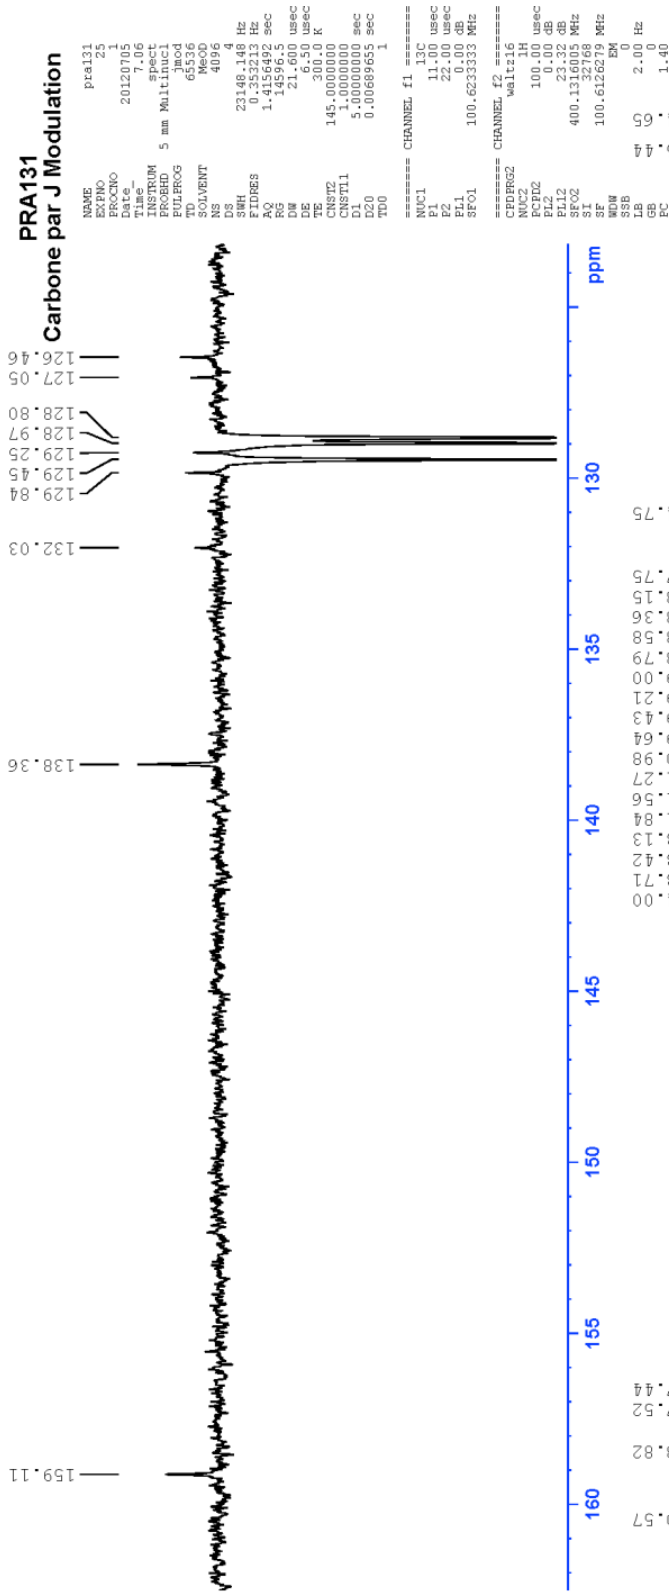

```

NAME          PRA131
EXPNO         25
PROCNO        1
Date_         20121005
Time          7.06
PROBHD        5 mm MultiH101
PULPROG       jmod
TD            65536
SOLVENT       MeOD
NS            4096
DS            4
SWH           23148.148 Hz
FIDRES       0.353213 Hz
AQ           1.4156492 sec
RG           129.600
DM           21.600 usec
DE           6.500 usec
TE           300.0 K
CNSTZ        145.0000000
INSTR1       spect
D1           5.0000000 sec
D20          0.00689655 sec
TD0          1
===== CHANNEL f1 =====
NUC1          13C
P1           11.00 usec
P2           22.00 usec
E1           0.00 dB
SFO1         100.6233333 MHz
===== CHANNEL f2 =====
CPDPRG2      waltz16
NUC2          1H
PCPDZ        100.00 usec
PCPDZ        23.32 dB
PCPDZ        23.32 dB
SFO2         400.1316005 MHz
SI           32768
SF           100.6126279 MHz
RG           60
LB           2.00 Hz
GB           0
PC           1.40
  
```

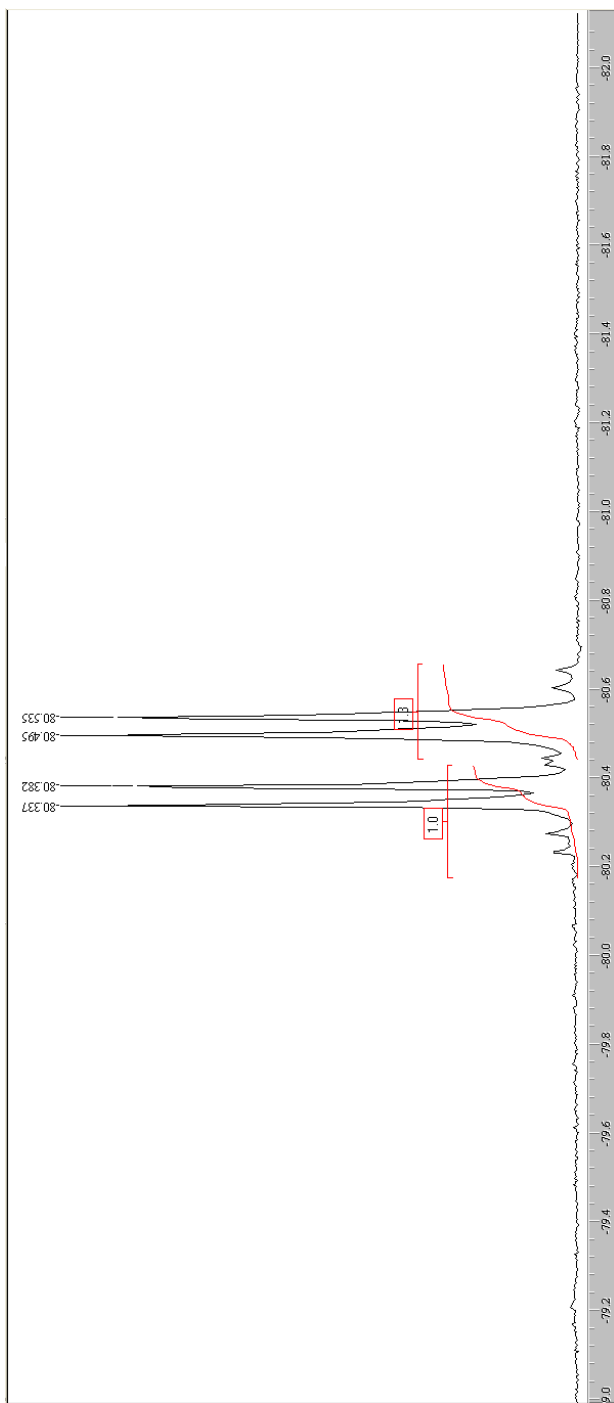

### 3. Computational Methods

Conformations of reactants and products were fully optimized without constraint using DFT [2] method with the hybrid Becke3LYP functional [3] and the 6-31G\* base [4] as implemented in the Gaussian 09 software package. [5] Vibrational analysis within the harmonic approximation was performed at the same level of theory upon geometrical optimization convergence and local minima were characterized by the absence of imaginary frequency. Figures are rendered with UCSF Chimera. [6]

#### Energies of Frontier Molecular Orbitals

| Compound | HOMO level (eV) | LUMO level (eV) |
|----------|-----------------|-----------------|
| 4        | -8.163          | -1.024          |
| 5a       | -6.430          | 0.016           |
| 5b       | -6.660          | -0.220          |
| 5c       | -6.697          | 0.282           |
| 5f       | -6.120          | -1.149          |
| 5g       | -6.318          | 0.744           |
| 5h       | -6.331          | 0.708           |
| 5i       | -7.425          | -1.199          |
| 5j       | -7.186          | -0.779          |
| 5k       | -7.697          | -0.208          |
| 5l       | -6.286          | -0.777          |
| 5m       | -7.233          | 0.706           |
| 5n       | -7.566          | -1.143          |

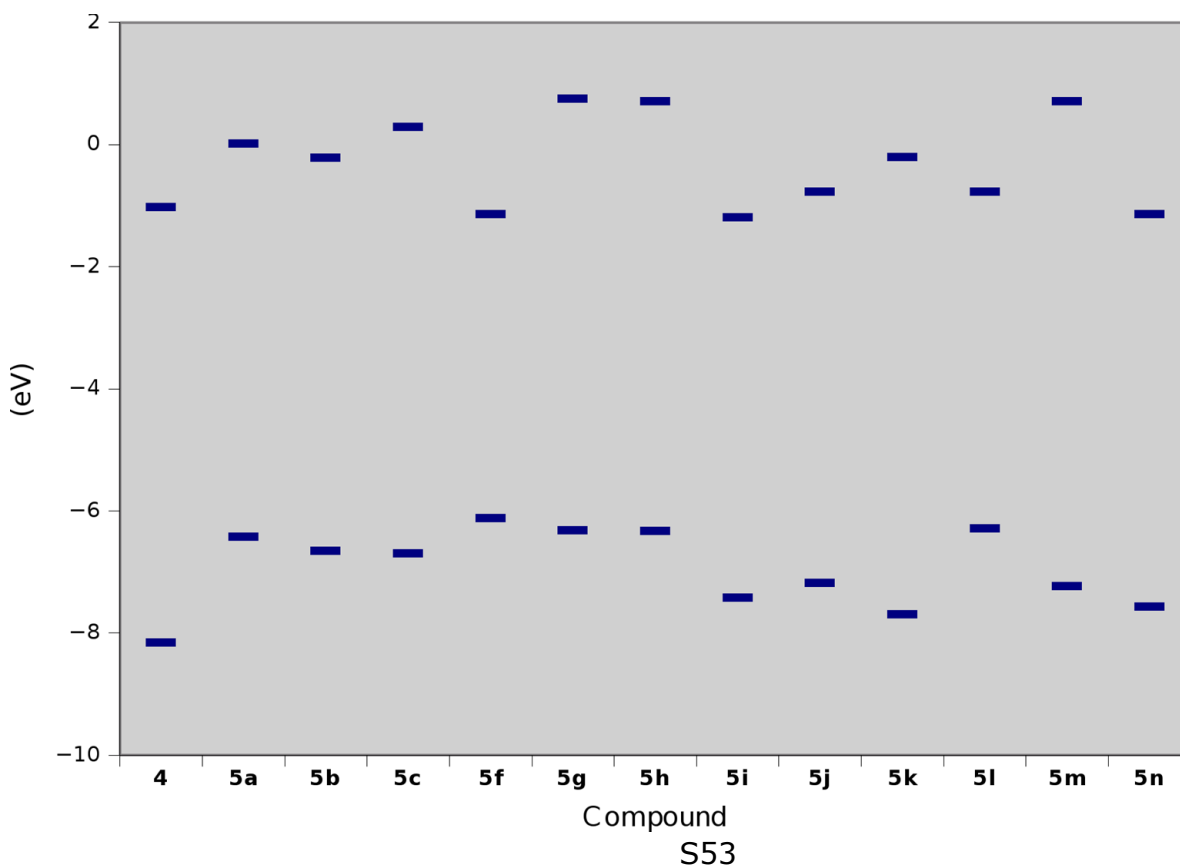

## Model Coordinates for DFT Calculations

Compound **4** (E(RB3LYP) = -505.598294916 Ha, Lowest Frequency: 52.9685 cm<sup>-1</sup>, Sum of electronic and thermal Free Energies = -505.602940 Ha.)

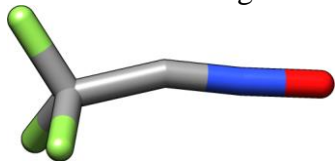

|   |          |          |          |
|---|----------|----------|----------|
| O | 2.99240  | 0.01520  | -0.00090 |
| N | 1.79300  | -0.03630 | 0.00220  |
| C | 0.62960  | -0.12600 | 0.00760  |
| C | -0.83180 | -0.00580 | 0.00030  |
| F | -1.35720 | -0.64340 | -1.05860 |
| F | -1.35940 | -0.53910 | 1.11440  |
| F | -1.20300 | 1.28510  | -0.06200 |

Compound **5a** (E(RB3LYP) = -348.956968953 Ha, Lowest Frequency: 26.4344 cm<sup>-1</sup>, Sum of electronic and thermal Free Energies = -348.828801 Ha.)

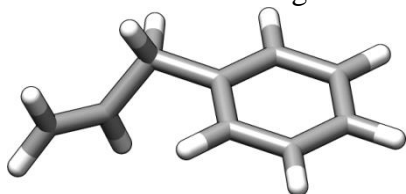

|   |          |          |          |
|---|----------|----------|----------|
| C | -3.47310 | 0.54740  | 0.11880  |
| C | -2.41680 | -0.17220 | 0.49950  |
| C | -1.42770 | -0.81840 | -0.43830 |
| C | 0.00620  | -0.35790 | -0.21700 |
| C | 0.32790  | 1.00670  | -0.23870 |
| C | 1.64240  | 1.43370  | -0.05490 |
| C | 2.66090  | 0.50150  | 0.15880  |
| C | 2.35270  | -0.85860 | 0.18740  |
| C | 1.03460  | -1.28160 | 0.00170  |
| H | -3.69950 | 0.71870  | -0.93200 |
| H | -4.15600 | 0.98790  | 0.84040  |
| H | -2.22210 | -0.31680 | 1.56280  |
| H | -1.46780 | -1.90980 | -0.31470 |
| H | -1.73090 | -0.61300 | -1.47430 |
| H | -0.46290 | 1.73640  | -0.39460 |
| H | 1.87270  | 2.49590  | -0.07650 |
| H | 3.68540  | 0.83410  | 0.30380  |
| H | 3.13650  | -1.59270 | 0.35590  |
| H | 0.80190  | -2.34420 | 0.02460  |

Compound **5b** (E(RB3LYP) = -632.193524709 Ha, Lowest Frequency: 8.0603 cm<sup>-1</sup>, Sum of electronic and thermal Free Energies = -632.015915 Ha.)

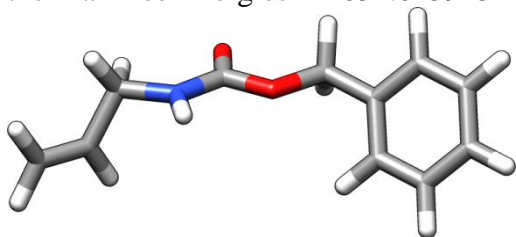

|   |          |          |          |
|---|----------|----------|----------|
| C | -5.50860 | 1.51150  | -0.29010 |
| C | -4.49310 | 0.85850  | 0.27480  |
| C | -3.79050 | -0.31900 | -0.34860 |
| N | -2.36330 | -0.08320 | -0.51490 |
| C | -1.41400 | -0.85080 | 0.09190  |
| O | -1.62480 | -1.82720 | 0.79020  |

|   |          |          |          |
|---|----------|----------|----------|
| O | -0.17480 | -0.36580 | -0.20390 |
| C | 0.92300  | -1.11100 | 0.36640  |
| C | 2.19310  | -0.32890 | 0.15180  |
| C | 3.29190  | -0.91910 | -0.47980 |
| C | 4.48410  | -0.21030 | -0.64550 |
| C | 4.58390  | 1.10330  | -0.18800 |
| C | 3.48790  | 1.70390  | 0.43820  |
| C | 2.30310  | 0.99120  | 0.61020  |
| H | -5.89920 | 1.22480  | -1.26480 |
| H | -5.99630 | 2.34950  | 0.20020  |
| H | -4.11630 | 1.16830  | 1.24960  |
| H | -3.87070 | -1.20460 | 0.29010  |
| H | -4.25060 | -0.56350 | -1.31550 |
| H | -2.05000 | 0.71960  | -1.04210 |
| H | 0.71720  | -1.27220 | 1.42980  |
| H | 0.97710  | -2.09570 | -0.10940 |
| H | 3.21500  | -1.94050 | -0.84530 |
| H | 5.33000  | -0.68330 | -1.13730 |
| H | 5.50890  | 1.65850  | -0.31880 |
| H | 3.55940  | 2.72790  | 0.79560  |
| H | 1.45050  | 1.46030  | 1.09420  |

Compound **5c** (E(RB3LYP)) = -519.092463571 Ha, Lowest Frequency: 18.2678 cm<sup>-1</sup>, Sum of electronic and thermal Free Energies = -518.907129 Ha.)

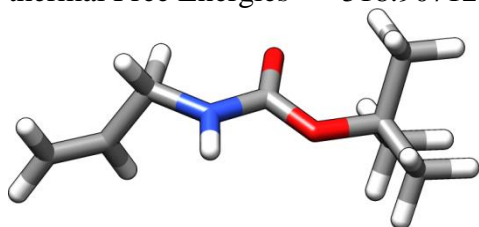

|   |          |          |          |
|---|----------|----------|----------|
| C | -4.73320 | 0.64420  | 0.14790  |
| C | -3.52150 | 0.21390  | 0.49920  |
| C | -2.57470 | -0.50540 | -0.42580 |
| N | -1.29810 | 0.18210  | -0.55370 |
| C | -0.11830 | -0.36650 | -0.13380 |
| O | 0.00090  | -1.49730 | 0.31110  |
| O | 0.87620  | 0.54270  | -0.30250 |
| C | 2.26710  | 0.21350  | 0.04100  |
| C | 2.76040  | -0.95430 | -0.82030 |
| C | 3.01110  | 1.50310  | -0.31700 |
| C | 2.38470  | -0.08090 | 1.54070  |
| H | -5.38990 | 1.14890  | 0.85120  |
| H | -5.12030 | 0.49780  | -0.85890 |
| H | -3.15410 | 0.37720  | 1.51250  |
| H | -2.33520 | -1.50190 | -0.04090 |
| H | -3.03750 | -0.63200 | -1.41370 |
| H | -1.28310 | 1.14820  | -0.84790 |
| H | 2.62580  | -0.72530 | -1.88340 |
| H | 3.82890  | -1.11930 | -0.64080 |
| H | 2.21770  | -1.87090 | -0.58450 |
| H | 2.62450  | 2.34670  | 0.26440  |
| H | 4.07920  | 1.39410  | -0.10110 |
| H | 2.89400  | 1.73480  | -1.38070 |
| H | 1.83750  | -0.98660 | 1.80670  |
| H | 3.43920  | -0.21360 | 1.80850  |
| H | 1.98920  | 0.75760  | 2.12480  |

Compound **5f** (E(RB3LYP)) = -2880.75323894 Ha, Lowest Frequency: 43.1560 cm<sup>-1</sup>, Sum of electronic and thermal Free Energies = -2880.664160 Ha.)

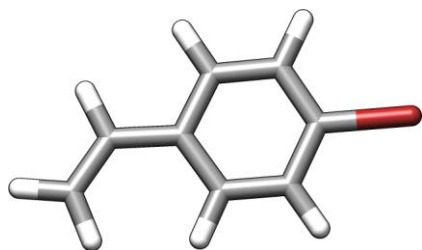

|    |          |          |          |
|----|----------|----------|----------|
| C  | -4.50750 | -0.59130 | -0.00010 |
| C  | -3.58430 | 0.37860  | 0.00000  |
| C  | -2.12130 | 0.22350  | 0.00000  |
| C  | -1.47660 | -1.02720 | 0.00010  |
| C  | -0.08940 | -1.12610 | 0.00000  |
| C  | 0.68000  | 0.03840  | -0.00000 |
| Br | 2.58680  | -0.09420 | -0.00000 |
| C  | 0.07700  | 1.29310  | -0.00000 |
| C  | -1.31430 | 1.37380  | 0.00000  |
| H  | -4.25520 | -1.64830 | -0.00020 |
| H  | -5.56640 | -0.35240 | -0.00010 |
| H  | -3.92800 | 1.41290  | 0.00010  |
| H  | -2.06340 | -1.94080 | 0.00010  |
| H  | 0.39400  | -2.09710 | 0.00010  |
| H  | 0.68420  | 2.19180  | -0.00000 |
| H  | -1.78540 | 2.35380  | -0.00000 |

Compound **5g** (E(RB3LYP)) = -526.581273708 Ha, Lowest Frequency: 50.5033 cm<sup>-1</sup>, Sum of electronic and thermal Free Energies = -526.435413 Ha.)

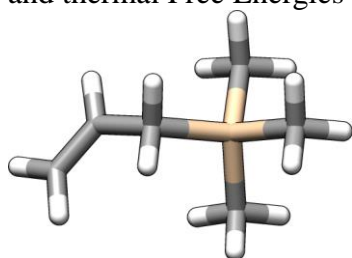

|    |          |          |          |
|----|----------|----------|----------|
| C  | 3.05710  | -0.29610 | 0.04520  |
| C  | 2.04280  | 0.52080  | -0.25400 |
| C  | 0.82160  | 0.15740  | -1.04710 |
| Si | -0.76140 | -0.02430 | 0.01820  |
| C  | -1.05090 | 1.56650  | 1.00700  |
| C  | -2.23000 | -0.32540 | -1.14240 |
| C  | -0.55700 | -1.48890 | 1.19850  |
| H  | 3.89710  | 0.03430  | 0.65020  |
| H  | 3.08770  | -1.32480 | -0.30920 |
| H  | 2.07280  | 1.54350  | 0.12630  |
| H  | 0.62260  | 0.92410  | -1.81070 |
| H  | 0.98200  | -0.78800 | -1.58350 |
| H  | -1.15380 | 2.43750  | 0.34810  |
| H  | -1.96770 | 1.49710  | 1.60530  |
| H  | -0.22280 | 1.76770  | 1.69680  |
| H  | -2.08900 | -1.23340 | -1.74120 |
| H  | -3.16380 | -0.44460 | -0.57920 |
| H  | -2.36920 | 0.51120  | -1.83790 |
| H  | 0.34120  | -1.37270 | 1.81570  |
| H  | -1.41780 | -1.58260 | 1.87160  |
| H  | -0.46130 | -2.43420 | 0.65040  |

Compound **5h** (E(RB3LYP)) = -313.264478145 Ha, Lowest Frequency: 141.1004 cm<sup>-1</sup>, Sum of electronic and thermal Free Energies = -313.090863 Ha.)



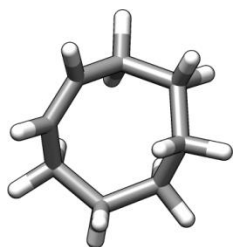

|   |          |          |          |
|---|----------|----------|----------|
| C | -0.49030 | 1.66000  | 0.23130  |
| C | 0.77580  | 1.36640  | -0.61130 |
| C | 1.86610  | 0.51100  | 0.05980  |
| C | 1.39100  | -0.83780 | 0.65030  |
| C | 0.58080  | -1.65390 | -0.32060 |
| C | -0.74910 | -1.57340 | -0.44510 |
| C | -1.65630 | -0.69840 | 0.39120  |
| C | -1.72910 | 0.78310  | -0.04780 |
| H | -0.24730 | 1.61770  | 1.30360  |
| H | -0.79440 | 2.69820  | 0.04360  |
| H | 0.47500  | 0.89540  | -1.55520 |
| H | 1.24470  | 2.31960  | -0.88930 |
| H | 2.65700  | 0.32420  | -0.68000 |
| H | 2.33550  | 1.08810  | 0.86900  |
| H | 2.27130  | -1.40370 | 0.98160  |
| H | 0.79850  | -0.63750 | 1.55150  |
| H | 1.13320  | -2.30260 | -1.00100 |
| H | -1.23440 | -2.16520 | -1.22140 |
| H | -2.67210 | -1.11220 | 0.35630  |
| H | -1.35330 | -0.73300 | 1.44690  |
| H | -2.58460 | 1.24010  | 0.46910  |
| H | -1.96260 | 0.82900  | -1.12100 |

Compound **5i** (E(RB3LYP) = -306.467759663 Ha, Lowest Frequency: 99.0875 cm<sup>-1</sup>, Sum of electronic and thermal Free Energies = -306.402260 Ha.)

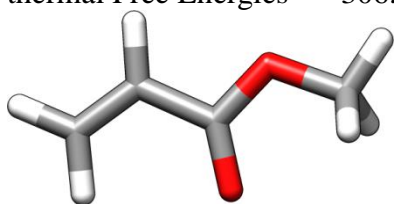

|   |          |          |          |
|---|----------|----------|----------|
| C | 2.30330  | -0.08880 | 0.00000  |
| O | 1.01720  | -0.72540 | -0.00000 |
| C | -0.04360 | 0.11780  | -0.00010 |
| O | 0.06060  | 1.32820  | -0.00000 |
| C | -1.31730 | -0.64640 | -0.00000 |
| C | -2.49200 | -0.01330 | 0.00000  |
| H | 3.03260  | -0.89940 | 0.00010  |
| H | 2.42330  | 0.53650  | -0.88900 |
| H | 2.42330  | 0.53650  | 0.88910  |
| H | -1.24020 | -1.72950 | -0.00000 |
| H | -3.43310 | -0.55470 | 0.00010  |
| H | -2.53010 | 1.07230  | 0.00000  |

Compound **5j** (E(RB3LYP) = -2689.01103286 Ha, Lowest Frequency: 108.6426 cm<sup>-1</sup>, Sum of electronic and thermal Free Energies = -2688.968930 Ha.)

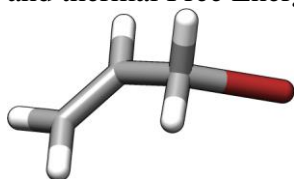

|    |          |          |          |
|----|----------|----------|----------|
| Br | -1.13490 | -0.12990 | -0.03430 |
| C  | 0.60660  | 0.86040  | 0.02100  |
| C  | 1.71130  | -0.02750 | 0.47050  |
| C  | 2.76440  | -0.33700 | -0.28850 |

|   |         |          |          |
|---|---------|----------|----------|
| H | 0.75380 | 1.24250  | -0.98860 |
| H | 0.41070 | 1.68130  | 0.71160  |
| H | 1.63000 | -0.41700 | 1.48370  |
| H | 3.56750 | -0.96690 | 0.08290  |
| H | 2.86380 | 0.02980  | -1.30780 |

Compound **5k** (E(RB3LYP) = -210.142831072 Ha, Lowest Frequency: 88.6494 cm<sup>-1</sup>, Sum of electronic and thermal Free Energies = -210.091852 Ha.)

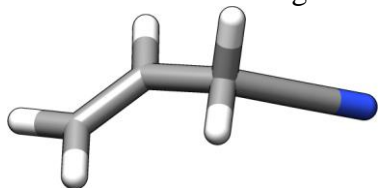

|   |          |          |          |
|---|----------|----------|----------|
| C | 2.16070  | -0.27360 | -0.30540 |
| C | 1.05200  | -0.17980 | 0.42520  |
| C | -0.09000 | 0.76170  | 0.10440  |
| C | -1.36990 | 0.05650  | -0.05500 |
| N | -2.37460 | -0.51300 | -0.17010 |
| H | 2.96470  | -0.94990 | -0.03020 |
| H | 2.30930  | 0.32070  | -1.20450 |
| H | 0.92450  | -0.79210 | 1.31600  |
| H | -0.21420 | 1.50130  | 0.90840  |
| H | 0.12120  | 1.32200  | -0.81400 |

Compound **5l** (E(RB3LYP) = -308.393595678 Ha, Lowest Frequency: 145.7241 cm<sup>-1</sup>, Sum of electronic and thermal Free Energies = -308.314525 Ha.)

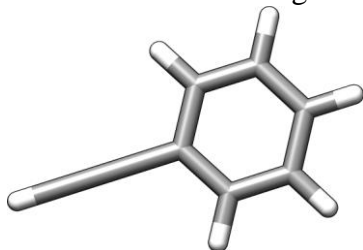

|   |          |          |          |
|---|----------|----------|----------|
| C | -3.23430 | 0.00000  | -0.00000 |
| C | -2.02420 | -0.00010 | -0.00000 |
| C | -0.59420 | -0.00000 | -0.00000 |
| C | 0.11990  | 1.21310  | -0.00000 |
| C | 1.51250  | 1.20860  | 0.00000  |
| C | 2.21300  | 0.00000  | 0.00000  |
| C | 1.51260  | -1.20860 | 0.00000  |
| C | 0.12000  | -1.21310 | -0.00000 |
| H | -4.30050 | 0.00000  | 0.00020  |
| H | -0.42860 | 2.15000  | -0.00000 |
| H | 2.05290  | 2.15130  | 0.00000  |
| H | 3.29960  | 0.00010  | 0.00000  |
| H | 2.05300  | -2.15130 | 0.00000  |
| H | -0.42850 | -2.15000 | -0.00000 |

Compound **5m** (E(RB3LYP) = -486.025144953 Ha, Lowest Frequency: 125.0675 cm<sup>-1</sup>, Sum of electronic and thermal Free Energies = -485.927896 Ha.)

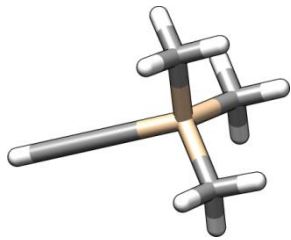

|    |          |         |          |
|----|----------|---------|----------|
| C  | 2.76150  | 0.00020 | 0.00010  |
| C  | 1.54610  | 0.00020 | 0.00000  |
| Si | -0.29960 | 0.00000 | -0.00010 |

|   |          |          |          |
|---|----------|----------|----------|
| C | -0.90060 | -1.52950 | -0.93230 |
| C | -0.90100 | -0.04280 | 1.79050  |
| C | -0.90120 | 1.57210  | -0.85830 |
| H | 3.82940  | 0.00020  | 0.00010  |
| H | -0.54530 | -2.45090 | -0.45710 |
| H | -1.99690 | -1.56500 | -0.95400 |
| H | -0.54510 | -1.52990 | -1.96880 |
| H | -0.54570 | 0.82900  | 2.35140  |
| H | -1.99730 | -0.04380 | 1.83190  |
| H | -0.54570 | -0.94070 | 2.30870  |
| H | -0.54590 | 1.62190  | -1.89370 |
| H | -1.99750 | 1.60830  | -0.87800 |
| H | -0.54600 | 2.46980  | -0.33980 |

Compound **5n** (E(RB3LYP)) = -344.520086714 Ha, Lowest Frequency: 53.7728 cm<sup>-1</sup>, Sum of electronic and thermal Free Energies = -344.452723 Ha.)

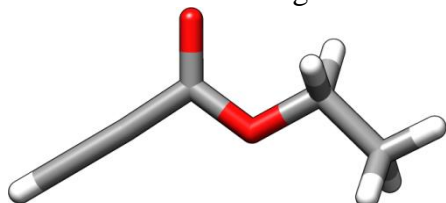

|   |          |          |          |
|---|----------|----------|----------|
| C | 2.75490  | -0.75740 | -0.00020 |
| C | 1.67890  | 0.31100  | 0.00020  |
| O | 0.39680  | -0.36620 | 0.00010  |
| C | -0.68220 | 0.43880  | -0.00000 |
| O | -0.64500 | 1.65110  | -0.00010 |
| C | -1.90860 | -0.33640 | -0.00000 |
| C | -2.95820 | -0.93250 | -0.00000 |
| H | 2.67600  | -1.39300 | 0.88740  |
| H | 2.67590  | -1.39250 | -0.88810 |
| H | 3.74340  | -0.28540 | -0.00010 |
| H | 1.73380  | 0.95460  | 0.88390  |
| H | 1.73360  | 0.95510  | -0.88320 |
| H | -3.88630 | -1.45930 | 0.00010  |

## References

1. Tanaka, K.; Masuda, H.; Mitsuhashi, K. *Bull. Chem. Soc. Jpn.*, **1984**, *57*, 2184-2191. for the melting point 44-45.5 °C and James W. Pavlik, Jennifer A. Lowell, Vuthichai Ervithayasuporn *J. Heterocyclic Chem.* **2005**, *42*, 1253-1255 for the NMR data.
- 2.(a) Kohn, W.; Sham, L. J. *Phys. Rev.* **1965**, *140*, A1133. (b) Hohenberg, P.; Khon, W. *Phys Rev.* **1964**, *136*, B864.
3. (a) Becke, A. D. *J. Chem. Phys.* **1993**, *98*, 5648. (b) Lee, C.; Yang, W.; Parr, R. G. *Phys. Rev. B* **1988**, *37*, 785.
- 4 Hehre, W. J.; Radom, L.; Schleyer, P. v. R.; Pople, J. A. *Ab Initio Molecular Orbital Theory*; Wiley: New York, 1986.
5. Gaussian 09, Revision A.02. Frisch, M. J.; Trucks, G. W.; Schlegel, H. B.; Scuseria, G. E.; Robb, M. A.; Cheeseman, J. R.; Scalmani, G.; Barone, V.; Mennucci, B.; Petersson, G. A.; Nakatsuji, H.; Caricato, M.; Li, X.; Hratchian, H. P.; Izmaylov, A. F.; Bloino, J.; Zheng, G.; Sonnenberg, J. L.; Hada, M.; Ehara, M.; Toyota, K.; Fukuda, R.; Hasegawa, J.; Ishida, M.; Nakajima, T.; Honda, Y.; Kitao, O.; Nakai, H.; Vreven, T.; Montgomery, J. A., Jr.; Peralta, J. E.; Ogliaro, F.; Bearpark, M.; Heyd, J. J.; Brothers, E.; Kudin, K. N.; Staroverov, V. N.; Kobayashi, R.; Normand, J.; Raghavachari, K.; Rendell, A.; Burant, J. C.; Iyengar, S. S.; Tomasi, J.; Cossi, M.; Rega, N.; Millam, J. M.; Klene, M.; Knox, J. E.; Cross, J. B.; Bakken, V.; Adamo, C.;

Jaramillo, J.; Gomperts, R.; Stratmann, R. E.; Yazyev, O.; Austin, A. J.; Cammi, R.; Pomelli, C.; Ochterski, J. W.; Martin, R. L.; Morokuma, K.; Zakrzewski, V. G.; Voth, G. A.; Salvador, P.; Dannenberg, J. J.; Dapprich, S.; Daniels, A. D.; Farkas, Ö.; Foresman, J. B.; Ortiz, J. V.; Cioslowski, J.; Fox, D. J. Gaussian, Inc., Wallingford CT, 2009.

6. (a) Chimera is developed by the Resource for Biocomputing, Visualization, and Informatics at the University of California, San Francisco, with support from the National Institutes of Health (National Center for Research Resources grant 2P41RR001081, National Institute of General Medical Sciences grant 9P41GM103311). (b) Pettersen, E. F.; Goddard, T. D.; Huang, C. C.; Couch, G. S.; Greenblatt, D. M.; Meng, E. C.; Ferrin, T. E. *J. Comput. Chem.* **2004**, *25*, 1605.
